# Supplementary material for: The widespread increase in inter-individual variability of gene expression in the human brain with age
Source: Aging (Albany NY). 2019 Apr 19;11(8):2253–80. doi: 10.18632/aging.101912 (PMC6520006; doi:10.18632/aging.101912)
Supplement: Supplemental Table 2 [file aging-11-101912-s003.xlsx]

## Sheet: KEGG pathways
ID	Description	N_genes	continuous_regression	continuous_sva	grouped_regression	grouped_sva
hsa00230	Purine metabolism	146	0.0289273	0.0292522	0.0237396	0.0211056
hsa05340	Primary immunodeficiency	30	-0.0150417	0.0177429	-0.083215	0.108973
hsa04514	Cell adhesion molecules (CAMs)	115	0.027537	0.0138044	0.0284659	-0.0198794
hsa05412	Arrhythmogenic right ventricular cardiomyopathy (ARVC)	66	0.023795	-0.0187043	0.0437271	-0.0779673
hsa01521	EGFR tyrosine kinase inhibitor resistance	75	0.0280659	-0.0064073	0.029503	0.0556115
hsa01522	Endocrine resistance	87	0.0388972	0.0215718	0.00629974	0.0810411
hsa01524	Platinum drug resistance	66	0.0213904	0.0264169	0.00901514	0.0563458
hsa04010	MAPK signaling pathway	233	0.0440426	0.00316209	0.0383383	0.0224134
hsa04012	ErbB signaling pathway	75	0.0330905	-0.0064073	0.0161685	0.0556115
hsa04014	Ras signaling pathway	203	0.0405179	0.0208728	0.0620306	0.0361567
hsa04015	Rap1 signaling pathway	196	0.0288196	0.0216058	0.0727814	0.0297826
hsa04022	cGMP-PKG signaling pathway	148	0.0413698	0.0346678	0.0471304	0.0358692
hsa04024	cAMP signaling pathway	178	0.0235249	0.0223783	0.0620943	0.0487112
hsa04062	Chemokine signaling pathway	152	0.0330735	0.0214433	0.000955931	0.0191375
hsa04066	HIF-1 signaling pathway	90	0.0299662	0.025344	0.0710033	0.0322382
hsa04068	FoxO signaling pathway	117	0.0415719	0.00899138	0.00368454	0.0305171
hsa04071	Sphingolipid signaling pathway	104	0.0571349	0.0264169	0.0487284	0.0127518
hsa04072	Phospholipase D signaling pathway	128	0.0516022	0.0279545	0.0402088	0.0259048
hsa04140	Autophagy - animal	116	0.0523521	0.014611	0.00340851	0.0116139
hsa04150	mTOR signaling pathway	133	0.0529849	0.0105139	0.0302371	0.0156529
hsa04151	PI3K-Akt signaling pathway	294	0.0361204	0.0176182	0.0374302	0.0337398
hsa04152	AMPK signaling pathway	109	0.0444242	0.0116246	0.077396	0.0507397
hsa04210	Apoptosis	125	0.0320327	0.0164527	0.0486487	0.00584961
hsa04211	Longevity regulating pathway	80	0.0289311	0.00394601	0.00686348	-0.00251949
hsa04213	Longevity regulating pathway - multiple species	55	0.0429848	0.0246621	0.0769256	0.0860057
hsa04218	Cellular senescence	149	0.0269892	0.0104081	0.0118297	0.017937
hsa04261	Adrenergic signaling in cardiomyocytes	134	0.0424257	0.0223103	0.0432891	0.0454387
hsa04370	VEGF signaling pathway	52	0.0359938	0.0253175	0.0395536	0.0639579
hsa04371	Apelin signaling pathway	123	0.041247	0.0177901	0.0357075	0.00433017
hsa04380	Osteoclast differentiation	109	0.0388972	0.0225767	0.00291304	-0.012547
hsa04510	Focal adhesion	180	0.0286723	-0.000493037	0.00295945	-0.0281187
hsa04550	Signaling pathways regulating pluripotency of stem cells	125	0.032335	0.0133435	0.049567	0.0564528
hsa04611	Platelet activation	109	0.0452931	0.0318174	0.0372512	0.0437425
hsa04620	Toll-like receptor signaling pathway	82	0.0391087	0.0233398	0.0248247	0.0269341
hsa04630	Jak-STAT signaling pathway	123	0.0173292	0.0255499	0.0486487	0.0219774
hsa04660	T cell receptor signaling pathway	90	0.0509449	0.025072	0.0148722	0.090796
hsa04662	B cell receptor signaling pathway	64	0.0509449	0.0293504	0.0233135	0.0758071
hsa04664	Fc epsilon RI signaling pathway	56	0.0428715	0.0293504	0.00958715	0.049677
hsa04666	Fc gamma R-mediated phagocytosis	86	0.050892	0.023761	0.0462062	0.0347378
hsa04668	TNF signaling pathway	95	0.0376505	0.0232189	-0.00667347	-0.0436592
hsa04722	Neurotrophin signaling pathway	114	0.0477865	0.0232284	0.0184054	0.0471698
hsa04725	Cholinergic synapse	100	0.0443581	0.0338707	0.0141537	0.0560322
hsa04728	Dopaminergic synapse	122	0.048187	0.0139234	0.0758364	0.0440228
hsa04910	Insulin signaling pathway	125	0.036128	0.0254176	0.0644828	0.0429947
hsa04914	Progesterone-mediated oocyte maturation	84	0.0423917	0.0328922	0.0377534	0.0861562
hsa04915	Estrogen signaling pathway	92	0.0346093	0.0276258	0.0341029	0.0458841
hsa04917	Prolactin signaling pathway	62	0.0381548	0.0333663	0.00257239	0.0687848
hsa04919	Thyroid hormone signaling pathway	107	0.0456596	0.0225767	0.0335846	0.0363666
hsa04920	Adipocytokine signaling pathway	59	0.0422821	-0.00519838	0.013576	0.00509664
hsa04922	Glucagon signaling pathway	92	0.0393146	-0.00133737	0.0772817	0.0488691
hsa04923	Regulation of lipolysis in adipocytes	47	0.0206046	0.0634232	0.0785823	0.174663
hsa04926	Relaxin signaling pathway	116	0.0420725	0.0269911	-0.0193392	0.0728844
hsa04931	Insulin resistance	94	0.0416494	-0.00128826	0.00358948	0.00577283
hsa04932	Non-alcoholic fatty liver disease (NAFLD)	125	0.0287686	0.00900649	0.0539732	0.0159773
hsa04933	AGE-RAGE signaling pathway in diabetic complications	91	0.0388972	0.0232189	-0.0306116	0.00644903
hsa04973	Carbohydrate digestion and absorption	29	0.0923921	0.0417797	0.107447	0.10992
hsa05142	Chagas disease (American trypanosomiasis)	92	0.0458428	0.0300361	0.00829094	0.0595183
hsa05145	Toxoplasmosis	95	0.0227618	0.0249454	-0.00250108	0.0529712
hsa05152	Tuberculosis	143	0.0196715	0.0246507	0.0538237	0.0528863
hsa05160	Hepatitis C	106	0.0401835	0.0128826	0.0476132	0.0215721
hsa05161	Hepatitis B	128	0.0334721	2.64455e-05	0.00295945	0.020574
hsa05162	Measles	107	0.0232869	0.0134568	-0.00368467	0.0219774
hsa05164	Influenza A	140	0.0115962	0.0138044	-0.018707	0.0421648
hsa05165	Human papillomavirus infection	280	0.0296508	0.01592	0.0588682	0.0215724
hsa05166	HTLV-I infection	225	0.0269779	0.00993207	-0.00368467	0.0539966
hsa05167	Kaposi's sarcoma-associated herpesvirus infection	160	0.040312	0.0127976	0.00295945	0.042958
hsa05169	Epstein-Barr virus infection	176	0.0204308	0.0129109	0.0405712	0.0688292
hsa05200	Pathways in cancer	358	0.0288196	0.0112052	0.0271662	0.0106047
hsa05205	Proteoglycans in cancer	181	0.0353875	0.0162223	0.0317752	0.0361567
hsa05210	Colorectal cancer	71	0.0259239	0.0162903	0.0307126	0.0305171
hsa05211	Renal cell carcinoma	62	0.0334948	0.00154327	0.0271958	0.0524997
hsa05212	Pancreatic cancer	72	0.0429678	0.0208558	0.00829094	0.0780129
hsa05213	Endometrial cancer	55	0.0221876	0.00141293	0.00291304	0.0156529
hsa05214	Glioma	66	0.0305782	0.00164905	0.0184054	0.0333369
hsa05215	Prostate cancer	83	0.0280659	0.00647908	-0.00380906	0.00584961
hsa05218	Melanoma	73	0.0282662	0.00188517	0.0258294	0.0313229
hsa05220	Chronic myeloid leukemia	76	0.038287	0.00659809	0.00295945	0.0262473
hsa05221	Acute myeloid leukemia	61	0.0330905	0.026687	0.0176338	0.0556115
hsa05222	Small cell lung cancer	87	0.0172347	0.0087307	-0.0618105	-0.0507431
hsa05223	Non-small cell lung cancer	63	0.0242805	-0.00497548	-0.0214362	-0.0259533
hsa05224	Breast cancer	137	0.0330905	0.00141293	0.0373167	0.0303712
hsa05230	Central carbon metabolism in cancer	57	0.0612849	0.042267	0.0758402	0.0564528
hsa05231	Choline metabolism in cancer	88	0.0500854	0.0211241	0.0221822	0.0458841
hsa05418	Fluid shear stress and atherosclerosis	123	0.0388972	0.0177788	0.013576	0.000850981
hsa00120	Primary bile acid biosynthesis	11	0.0584553	0.0100567	0.22701	-0.0462948
hsa04146	Peroxisome	74	0.0126049	0.0369421	0.0513706	0.091859
hsa00520	Amino sugar and nucleotide sugar metabolism	43	0.0578697	0.0530982	0.0299398	0.0481324
hsa04974	Protein digestion and absorption	71	0.00652442	0.010325	-0.0181075	0.00760836
hsa04621	NOD-like receptor signaling pathway	137	0.03691	0.0116132	-0.01486	-0.0507431
hsa04622	RIG-I-like receptor signaling pathway	53	0.0464983	0.049343	0.0539732	0.0984637
hsa03013	RNA transport	139	0.0210693	0.00337366	0.0205878	-0.0238918
hsa05034	Alcoholism	148	0.0354687	0.0212223	0.0428271	0.0248725
hsa05203	Viral carcinogenesis	181	0.0295091	0.0164527	0.0285551	0.0281236
hsa04144	Endocytosis	231	0.0395054	0.0138346	0.0658706	0.0119297
hsa03008	Ribosome biogenesis in eukaryotes	72	0.0215925	0.0280376	-0.0395282	0.0200208
hsa03010	Ribosome	121	0.0425919	0.0180734	0.0552704	0.00130252
hsa04215	Apoptosis - multiple species	29	0.0319194	-0.0029052	0.0542059	-0.0618924
hsa05206	MicroRNAs in cancer	155	0.0339103	0.0223538	0.0342158	0.0383115
hsa04742	Taste transduction	65	0.0381416	0.022112	-0.00637279	0.0308126
hsa04310	Wnt signaling pathway	128	0.0312073	0.0139064	0.0299761	0.0406438
hsa00563	Glycosylphosphatidylinositol (GPI)-anchor biosynthesis	23	0.0252401	-0.00769556	0.205133	0.00303497
hsa04670	Leukocyte transendothelial migration	89	0.0334948	0.0118701	0.0144886	-0.0143491
hsa03410	Base excision repair	29	0.00880248	0.0117606	0.0227743	0.0907663
hsa04217	Necroptosis	124	0.0292616	0.000309787	0.0444157	0.00109622
hsa04141	Protein processing in endoplasmic reticulum	151	0.0232869	0.000706465	-0.0749532	0.0575716
hsa05010	Alzheimer's disease	150	0.0324294	0.0210542	0.0718106	0.0174866
hsa05014	Amyotrophic lateral sclerosis (ALS)	47	0.0338537	0.00141293	0.0525761	0.071463
hsa05020	Prion diseases	32	-0.0112808	0.00975451	-0.0162597	-0.0465485
hsa04650	Natural killer cell mediated cytotoxicity	99	0.0205631	0.030684	0.0296182	0.0361567
hsa03460	Fanconi anemia pathway	41	0.0317456	0.0255121	0.03779	0.0504044
hsa00240	Pyrimidine metabolism	83	0.0552819	0.0274086	0.0664881	0.0353638
hsa00760	Nicotinate and nicotinamide metabolism	24	0.0515134	0.0346943	0.0559954	0.0158615
hsa05144	Malaria	41	0.0110125	0.0158596	0.0292743	0.0126197
hsa04142	Lysosome	106	0.0380962	0.018506	0.00733558	0.0731152
hsa00190	Oxidative phosphorylation	103	0.0171856	0.0237214	0.10574	0.0293981
hsa04723	Retrograde endocannabinoid signaling	130	0.0393694	0.0243334	0.0433232	0.0038095
hsa05012	Parkinson's disease	114	0.0203194	0.0164962	0.0425185	0.0160702
hsa05016	Huntington's disease	167	0.0319194	0.0137893	0.0716139	0.0293981
hsa04350	TGF-beta signaling pathway	75	0.0391616	0.00381567	0.0732237	-0.0216985
hsa03420	Nucleotide excision repair	36	0.0293561	0.0138611	-0.0584952	0.0909897
hsa04120	Ubiquitin mediated proteolysis	125	0.0215075	0.0145222	-0.00666688	0.0122358
hsa00970	Aminoacyl-tRNA biosynthesis	40	0.00329999	-0.00517193	-0.0456205	-0.0239851
hsa01523	Antifolate resistance	28	0.0172706	0.0460241	0.00740638	-0.0243594
hsa02010	ABC transporters	39	0.0359806	0.0371971	0.070504	-0.00989313
hsa03320	PPAR signaling pathway	61	0.0543412	0.044564	0.0447704	0.0766409
hsa03040	Spliceosome	120	0.0248925	0.0116378	-0.0325871	0.00522183
hsa00532	Glycosaminoglycan biosynthesis - chondroitin sulfate / dermatan sulfate	20	0.0372953	-0.0128543	-0.0387888	-0.173538
hsa04810	Regulation of actin cytoskeleton	191	0.0452931	0.0179072	0.0929356	0.0282422
hsa05100	Bacterial invasion of epithelial cells	71	0.0445187	0.0334759	0.09767	0.08796
hsa05130	Pathogenic Escherichia coli infection	51	0.03691	0.0117984	0.124415	-0.02006
hsa05131	Shigellosis	62	0.050892	0.0279262	0.116397	0.0460876
hsa05132	Salmonella infection	75	0.0388972	0.0134568	-0.0154593	0.00644903
hsa04530	Tight junction	144	0.0378318	-0.00207217	0.0357663	-0.0299825
hsa04020	Calcium signaling pathway	163	0.0395432	0.0182737	0.0662105	0.0187549
hsa03440	Homologous recombination	32	0.040159	0.0245733	-0.00860683	0.0647101
hsa03450	Non-homologous end-joining	12	0.00576128	0.0153477	-0.00264883	0.0280595
hsa04137	Mitophagy - animal	60	0.0496113	-0.00189272	-0.0662897	-0.0197057
hsa04972	Pancreatic secretion	83	0.036128	0.0409259	0.0421422	0.099196
hsa03018	RNA degradation	69	0.0114583	0.0185532	-0.00601092	-0.0592786
hsa04360	Axon guidance	165	0.0351117	-0.00352477	0.0206423	-0.0284328
hsa00310	Lysine degradation	55	0.0213186	0.00451836	0.000365468	-0.0463645
hsa04614	Renin-angiotensin system	20	0.0264868	0.019951	-0.1322	-0.0176755
hsa04080	Neuroactive ligand-receptor interaction	224	0.0299209	0.0188687	0.0388336	-0.00845435
hsa00564	Glycerophospholipid metabolism	85	0.0317721	0.0047337	0.00906193	0.0356316
hsa04216	Ferroptosis	37	0.0452138	0.0184172	-0.0480416	0.0111427
hsa04520	Adherens junction	68	0.0264075	0.00917461	0.061635	-0.0311222
hsa00533	Glycosaminoglycan biosynthesis - keratan sulfate	13	0.0117001	0.0138195	-0.149479	-0.111367
hsa04110	Cell cycle	118	0.0394204	0.0139971	0.0306318	0.00860414
hsa04114	Oocyte meiosis	106	0.0446906	0.0163583	0.0758364	0.0555425
hsa04115	p53 signaling pathway	62	0.0181943	-0.000153	0.00218629	-0.0144192
hsa05168	Herpes simplex infection	153	0.0328828	0.0144995	-0.0104883	0.0180809
hsa00830	Retinol metabolism	37	0.0271479	0.0487461	0.0149136	0.0959318
hsa03015	mRNA surveillance pathway	80	0.0280659	0.0265869	0.0804913	0.122149
hsa05219	Bladder cancer	38	0.0268778	0.010274	-0.0358351	0.0560322
hsa00510	N-Glycan biosynthesis	43	0.0449002	0.0428979	0.00501172	-0.0429689
hsa03050	Proteasome	37	0.0233549	-0.0312243	0.0593166	-0.102581
hsa04612	Antigen processing and presentation	58	0.0163734	0.0239008	0.0383755	0.0488016
hsa05120	Epithelial cell signaling in Helicobacter pylori infection	59	0.056929	0.0501364	0.0924119	0.126194
hsa05030	Cocaine addiction	46	0.0353403	0.0170761	0.0445409	-0.0309825
hsa04390	Hippo signaling pathway	137	0.0297924	3.78e-06	0.0542059	0.040441
hsa03022	Basal transcription factors	36	0.0184777	0.0172876	0.0790098	0.127819
hsa04130	SNARE interactions in vesicular transport	25	0.0409863	-0.000766912	0.154906	-0.0105068
hsa00130	Ubiquinone and other terpenoid-quinone biosynthesis	10	0.0280452	0.0278997	0.0949229	0.00754823
hsa04270	Vascular smooth muscle contraction	109	0.0314094	0.0375749	0.0502912	0.0091233
hsa04911	Insulin secretion	77	0.0403328	0.0232416	0.0526303	0.0504364
hsa00790	Folate biosynthesis	24	-0.00967895	-0.0197546	-0.0364552	-0.140649
hsa04727	GABAergic synapse	81	0.0409486	0.0192068	-0.0442723	-0.00715388
hsa00360	Phenylalanine metabolism	16	0.0310656	0.0434665	0.0490926	-0.0886571
hsa05202	Transcriptional misregulation in cancer	164	0.0127032	0.0116283	0.026736	0.0395212
hsa04976	Bile secretion	55	0.0432606	0.0232416	0.063545	-0.00710655
hsa04921	Oxytocin signaling pathway	144	0.0413075	0.0217304	0.0358024	0.0485636
hsa05216	Thyroid cancer	36	0.0167757	-0.01143	-0.0237285	-0.00872072
hsa05217	Basal cell carcinoma	56	0.0240557	-0.00689465	0.039035	0.000711986
hsa04623	Cytosolic DNA-sensing pathway	49	0.0110201	0.0413377	0.013576	0.052309
hsa04145	Phagosome	125	0.03691	0.040839	0.0637277	0.049665
hsa04721	Synaptic vesicle cycle	58	0.0594904	0.0287139	0.173687	0.109952
hsa04966	Collecting duct acid secretion	23	0.0592675	0.0532569	0.274031	0.134907
hsa05110	Vibrio cholerae infection	46	0.0580983	0.0245374	0.124129	0.111401
hsa05323	Rheumatoid arthritis	67	0.0314358	0.0263168	0.122335	0.10513
hsa00601	Glycosphingolipid biosynthesis - lacto and neolacto series	23	0.00668309	-0.00986029	-0.0994423	-0.138909
hsa00603	Glycosphingolipid biosynthesis - globo and isoglobo series	12	0.0174784	0.0594432	-0.0799761	0.0807388
hsa04512	ECM-receptor interaction	71	0.0157311	0.00621841	0.0292743	-0.0579252
hsa05146	Amoebiasis	82	0.0326296	0.0227165	0.00993076	-0.0341096
hsa00010	Glycolysis / Gluconeogenesis	57	0.0410014	0.0264868	0.107447	0.0559178
hsa00040	Pentose and glucuronate interconversions	16	-0.0192635	-0.0285344	-0.0471498	-0.0307538
hsa00561	Glycerolipid metabolism	52	0.0296848	0.0293467	0.0969118	0.0860388
hsa00270	Cysteine and methionine metabolism	38	0.0409504	0.0282681	0.0384232	0.0245137
hsa00430	Taurine and hypotaurine metabolism	10	0.0778415	0.0684913	-0.0623935	0.196091
hsa04260	Cardiac muscle contraction	65	0.0436913	0.012807	0.0403328	-0.023291
hsa05410	Hypertrophic cardiomyopathy (HCM)	75	0.024647	-0.0198717	0.0325328	-0.0448834
hsa05414	Dilated cardiomyopathy (DCM)	82	0.023795	-0.00325465	0.0393355	-0.0421115
hsa04540	Gap junction	83	0.0488406	0.0440389	0.0914931	0.0853895
hsa00920	Sulfur metabolism	9	0.0614172	0.0325919	0.30703	0.146848
hsa00440	Phosphonate and phosphinate metabolism	6	0.0400324	-0.00803368	-0.120116	0.0683963
hsa00565	Ether lipid metabolism	38	0.0268551	0.0391881	0.0808738	0.107918
hsa05133	Pertussis	60	0.0391087	0.0244127	0.0499247	0.0139392
hsa04070	Phosphatidylinositol signaling system	91	0.0754105	0.0420819	0.0486487	0.101786
hsa04720	Long-term potentiation	65	0.0608429	0.00983007	0.0720073	0.0556115
hsa04726	Serotonergic synapse	97	0.0420366	0.0284173	0.0527581	0.00433017
hsa04392	Hippo signaling pathway - multiple species	26	0.0421499	0.0314849	-0.0511502	-0.0387858
hsa00562	Inositol phosphate metabolism	67	0.0720293	0.0420819	0.0497402	0.0645675
hsa00062	Fatty acid elongation	19	0.0510884	0.0339028	0.25623	0.0373776
hsa00071	Fatty acid degradation	36	0.0449682	0.0264056	0.0754419	0.0263645
hsa00280	Valine, leucine and isoleucine degradation	43	0.05181	0.0331019	0.0613072	0.0373776
hsa01212	Fatty acid metabolism	39	0.0397623	0.0339028	0.0129702	0.0373776
hsa04064	NF-kappa B signaling pathway	77	0.0229696	0.0251985	-0.0133706	-0.0281122
hsa05140	Leishmaniasis	55	0.0391276	0.0249454	0.0626566	0.0180911
hsa04916	Melanogenesis	93	0.0297924	-0.000736689	0.0421422	-0.0259533
hsa04918	Thyroid hormone synthesis	66	0.0211637	0.0310618	0.0470636	0.064466
hsa04925	Aldosterone synthesis and secretion	78	0.039938	0.0374559	0.0256522	0.0307759
hsa04962	Vasopressin-regulated water reabsorption	43	0.0295091	0.0449267	0.124732	0.110847
hsa05031	Amphetamine addiction	64	0.0469554	-0.0027503	0.0735725	-0.044039
hsa04657	IL-17 signaling pathway	74	0.0408692	0.0417514	0.0175603	0.0555425
hsa04136	Autophagy - other	27	0.0662189	0.0054515	-0.0709856	0.129322
hsa03030	DNA replication	30	0.0149548	0.0236987	0.0378441	0.110521
hsa04610	Complement and coagulation cascades	61	0.0435062	0.028814	0.0441932	0.0577006
hsa04975	Fat digestion and absorption	32	0.0299719	0.0415719	0.0249609	-0.00815277
hsa00600	Sphingolipid metabolism	37	0.0290331	0.0321423	0.0488081	-0.0107362
hsa00100	Steroid biosynthesis	16	-0.00620519	-0.0131622	0.00455333	-0.0694577
hsa04977	Vitamin digestion and absorption	22	0.00335666	0.00616552	0.00402628	-0.0468008
hsa04060	Cytokine-cytokine receptor interaction	199	0.0253685	0.0233776	0.0176338	0.0169017
hsa00514	Other types of O-glycan biosynthesis	20	0.0358748	-0.0202476	0.0256382	-0.137319
hsa00515	Mannose type O-glycan biosynthesis	22	0.0548739	-0.00427657	0.0830823	-0.0478391
hsa00450	Selenocompound metabolism	17	0.030242	0.050858	-0.117022	0.0879798
hsa00670	One carbon pool by folate	17	0.0402874	0.0111788	0.0641045	-0.0287224
hsa03020	RNA polymerase	25	0.0144542	0.048561	0.0913447	0.0898683
hsa00900	Terpenoid backbone biosynthesis	19	0.0411941	-0.00377033	-0.0771813	0.0430219
hsa00983	Drug metabolism - other enzymes	25	0.0545943	0.0312394	0.0469003	0.0124679
hsa04730	Long-term depression	57	0.0589578	0.0409259	0.0977962	0.0808218
hsa04672	Intestinal immune network for IgA production	31	-0.0255612	0.0133057	-0.0311527	0.0169017
hsa04713	Circadian entrainment	86	0.0456294	0.0100039	0.116187	-0.00190885
hsa04724	Glutamatergic synapse	104	0.0498172	0.0133756	0.0887388	-0.0432946
hsa05032	Morphine addiction	84	0.0356557	0.014339	-0.00507325	-0.00123322
hsa04330	Notch signaling pathway	47	0.0517458	0.0284248	0.138044	0.0189434
hsa04658	Th1 and Th2 cell differentiation	76	0.036213	0.0246942	0.0127029	0.0678814
hsa04750	Inflammatory mediator regulation of TRP channels	86	0.0411847	0.0331415	0.0662068	0.0196777
hsa04912	GnRH signaling pathway	81	0.0403328	0.0382549	0.0421422	0.0616628
hsa04913	Ovarian steroidogenesis	43	0.0189159	0.0256897	0.0769256	0.0616628
hsa04970	Salivary secretion	80	0.0549211	0.0400929	0.0715681	0.0861929
hsa04971	Gastric acid secretion	69	0.0431964	0.02388	0.0604685	0.0504364
hsa00590	Arachidonic acid metabolism	49	0.0189159	0.0441938	0.0687989	0.111499
hsa05150	Staphylococcus aureus infection	39	0.0204006	0.0110239	0.0307874	-0.012607
hsa05134	Legionellosis	46	0.0180866	0.0213319	0.0103896	0.000129765
hsa00511	Other glycan degradation	15	0.00937672	-0.00398567	-0.138143	-0.0397577
hsa00340	Histidine metabolism	21	0.0381945	0.0227958	0.132591	0.0120159
hsa00620	Pyruvate metabolism	35	0.0401514	0.00602196	0.0568499	-0.0213959
hsa01200	Carbon metabolism	104	0.0368004	0.0299832	0.0553405	-0.00599632
hsa04740	Olfactory transduction	243	0.019373	0.0182397	0.00256113	0.0147698
hsa00053	Ascorbate and aldarate metabolism	10	-0.0136476	-0.0210221	0.156917	-0.0215544
hsa00140	Steroid hormone biosynthesis	33	0.0210428	0.0207708	0.0773086	0.0759067
hsa00860	Porphyrin and chlorophyll metabolism	21	0.0488406	-0.00319232	0.0792575	-0.0134707
hsa00980	Metabolism of xenobiotics by cytochrome P450	44	0.0266757	0.0194448	0.0644495	0.00912484
hsa00982	Drug metabolism - cytochrome P450	39	0.0301022	0.0322934	0.0391693	0.0120159
hsa05204	Chemical carcinogenesis	48	0.0469611	0.0381472	0.0837619	0.0690372
hsa03060	Protein export	22	0.0247301	-0.017044	-0.159481	-0.0922555
hsa04964	Proximal tubule bicarbonate reclamation	19	0.0491466	0.0177712	0.181795	0.0504364
hsa00260	Glycine, serine and threonine metabolism	34	0.0429338	0.0323029	0.129262	0.0806241
hsa01230	Biosynthesis of amino acids	65	0.0439142	0.0435175	0.0335846	0.0237881
hsa04924	Renin secretion	59	0.0608429	0.0348095	0.0421422	0.0330556
hsa04340	Hedgehog signaling pathway	45	-0.00171138	0.00993207	-0.0828478	-0.0393253
hsa00591	Linoleic acid metabolism	20	0.0219288	0.0708279	0.03091	0.172533
hsa00592	alpha-Linolenic acid metabolism	20	0.0166303	0.0668384	0.0849033	0.172533
hsa00380	Tryptophan metabolism	35	0.0435742	0.0415757	0.111471	0.0879798
hsa04961	Endocrine and other factor-regulated calcium reabsorption	44	0.0585989	0.0350399	0.064778	0.0931953
hsa00512	Mucin type O-glycan biosynthesis	22	0.022384	0.00945228	-0.00588838	0.0435057
hsa00910	Nitrogen metabolism	15	0.0399739	0.0177712	-0.00931874	0.0275087
hsa00330	Arginine and proline metabolism	42	0.0207123	0.037811	0.0966527	0.0731751
hsa00630	Glyoxylate and dicarboxylate metabolism	25	0.0179148	0.023302	0.0641045	0.0625983
hsa00534	Glycosaminoglycan biosynthesis - heparan sulfate / heparin	22	0.0753727	0.0306916	0.0668332	0.062706
hsa04978	Mineral absorption	39	0.00901782	0.0112354	-0.0513919	-0.00680173
hsa01040	Biosynthesis of unsaturated fatty acids	16	0.0424918	0.0424352	0.154517	0.0440867
hsa05033	Nicotine addiction	37	0.0504159	0.022112	0.0732008	-0.0597845
hsa04659	Th17 cell differentiation	87	0.0390974	0.0249454	-0.00968363	0.0801513
hsa00650	Butanoate metabolism	25	0.0424559	0.0336572	-0.0549328	0.0110981
hsa00480	Glutathione metabolism	48	0.0319893	0.0194448	0.0741989	0.022671
hsa05322	Systemic lupus erythematosus	94	0.0241086	0.0183719	0.0322916	0.0254633
hsa00250	Alanine, aspartate and glutamate metabolism	31	0.0377222	0.0217153	-0.0262391	-0.0478404
hsa04930	Type II diabetes mellitus	40	0.0456652	0.0430812	0.0378627	0.0440464
hsa00350	Tyrosine metabolism	31	0.0395696	0.0380131	0.0682518	-0.0410467
hsa04744	Phototransduction	22	0.0222064	0.0136212	-0.0359095	0.00965681
hsa00052	Galactose metabolism	24	0.0533117	0.0551761	-0.00291616	0.0560613
hsa00030	Pentose phosphate pathway	26	0.054753	0.0491825	-0.0349383	-0.0500514
hsa04940	Type I diabetes mellitus	29	-0.00265964	0.0514889	0.0626566	0.0415992
hsa00220	Arginine biosynthesis	17	-0.00218362	0.0280622	-0.060648	-0.0680406
hsa04640	Hematopoietic cell lineage	69	0.0173292	0.02861	-0.00368467	-0.00343424
hsa00531	Glycosaminoglycan degradation	16	0.044309	0.0311317	0.0101698	-0.0260176
hsa04710	Circadian rhythm	23	-0.0236005	-0.0268344	-0.191522	0.0473877
hsa00020	Citrate cycle (TCA cycle)	27	0.0303705	0.00480548	-0.0736204	-0.0347491
hsa01210	2-Oxocarboxylic acid metabolism	16	0.0622785	0.0441012	0.0950906	0.0198903
hsa05320	Autoimmune thyroid disease	32	-0.00677187	0.00872504	0.0107964	0.0269341
hsa05416	Viral myocarditis	49	-0.000596907	0.0032981	0.073119	-0.0448834
hsa00730	Thiamine metabolism	14	0.0313565	0.0491806	0.0725087	0.0220522
hsa00640	Propanoate metabolism	27	0.0419384	0.0313414	0.0218934	0.0373776
hsa04950	Maturity onset diabetes of the young	22	-0.00420479	0.00573106	0.160976	0.0888637
hsa00500	Starch and sucrose metabolism	21	0.0341332	0.00482814	0.10211	0.05998
hsa00410	beta-Alanine metabolism	28	0.0905523	0.0431284	0.121455	0.0441179
hsa00770	Pantothenate and CoA biosynthesis	14	-0.0265397	0.0209238	0.00981201	-0.131152
hsa00051	Fructose and mannose metabolism	28	0.0280754	0.0235986	0.118602	0.00245858
hsa05143	African trypanosomiasis	29	0.0129317	0.0232189	-0.0564403	0.0126197
hsa00061	Fatty acid biosynthesis	10	0.0566192	0.0346017	-0.0280497	0.123627
hsa05310	Asthma	16	-0.0229809	0.0339708	-0.0705463	0.0355311
hsa04960	Aldosterone-regulated sodium reabsorption	33	0.0657504	0.0313565	0.077396	0.099196
hsa00604	Glycosphingolipid biosynthesis - ganglio series	14	0.0187667	0.0410184	-0.209484	0.0109175
hsa03430	Mismatch repair	19	0.0379149	0.0425579	0.0178622	0.0638816
hsa04122	Sulfur relay system	8	-0.00359466	0.0265189	-0.0194347	0.00894217
hsa05321	Inflammatory bowel disease (IBD)	46	0.0309069	0.0259333	-0.0102973	0.0472852
hsa05330	Allograft rejection	23	-0.00626752	0.040839	-0.00250108	0.0415992
hsa05332	Graft-versus-host disease	25	-0.0101587	0.040839	0.0398436	0.0180911
hsa00072	Synthesis and degradation of ketone bodies	9	0.0411941	0.0205555	-0.0765218	-0.0161091
hsa00740	Riboflavin metabolism	5	0.0560374	0.0373596	0.186683	0.139153

## Sheet: GO terms
GO_id	GO_term	N_genes	continuous_regression	continuous_sva	grouped_regression	grouped_sva
GO:0000002	mitochondrial genome maintenance	25	-0.0043748	0.0345866	-0.0178451	0.0519644
GO:0000018	regulation of DNA recombination	82	0.0240312	0.0207916	-0.000963025	-0.035808
GO:0000022	mitotic spindle elongation	10	0.0945511	0.0710734	0.10731	0.141241
GO:0000027	ribosomal large subunit assembly	26	-0.00505482	0.0139347	0.0527036	0.121412
GO:0000028	ribosomal small subunit assembly	15	0.0803897	-0.0191161	-0.132989	-0.0911204
GO:0000038	very long-chain fatty acid metabolic process	21	0.0487423	0.044564	0.214124	0.0428119
GO:0000041	transition metal ion transport	97	0.029324	0.0259239	0.132517	0.0730407
GO:0000045	autophagosome assembly	80	0.0451855	0.0229885	-0.0253878	-0.0326672
GO:0000054	ribosomal subunit export from nucleus	15	-0.012297	-0.0151645	-0.13558	0.00113098
GO:0000055	ribosomal large subunit export from nucleus	10	-0.0158558	-0.00978096	-0.121955	0.03536
GO:0000060	protein import into nucleus, translocation	33	0.0400985	0.0267664	-0.047972	0.0121543
GO:0000070	mitotic sister chromatid segregation	139	0.0433966	0.0308767	0.010035	0.03752
GO:0000075	cell cycle checkpoint	186	0.0265605	0.0153458	-0.0128502	0.00420863
GO:0000076	DNA replication checkpoint	12	0.0715249	0.021075	0.0356772	-0.0186808
GO:0000077	DNA damage checkpoint	126	0.0259768	0.0199284	-0.0128502	0.0392333
GO:0000079	regulation of cyclin-dependent protein serine/threonine kinase activity	76	0.0346848	0.0187742	0.0232036	0.0719084
GO:0000082	G1/S transition of mitotic cell cycle	220	0.0270743	0.0140538	0.00560916	0.0354154
GO:0000083	regulation of transcription involved in G1/S transition of mitotic cell cycle	26	0.0478016	0.00714399	-0.0384396	-0.0273281
GO:0000086	G2/M transition of mitotic cell cycle	172	0.0339916	0.0312224	0.0905556	0.0699334
GO:0000096	sulfur amino acid metabolic process	35	0.0131244	-0.000793357	-0.0112475	-0.0473245
GO:0000097	sulfur amino acid biosynthetic process	14	0.0088346	0.0184361	-0.184015	-0.0327751
GO:0000098	sulfur amino acid catabolic process	13	0.0131244	-0.01643	0.0648462	-0.0271824
GO:0000132	establishment of mitotic spindle orientation	21	0.00176805	0.00252741	0.0210806	0.000740258
GO:0000154	rRNA modification	31	0.042505	0.0204384	-0.0647573	0.0372314
GO:0000183	chromatin silencing at rDNA	31	0.0212053	0.0471103	0.0659906	0.0507397
GO:0000184	nuclear-transcribed mRNA catabolic process, nonsense-mediated decay	108	0.0221347	0.0045958	0.0405054	0.0246397
GO:0000186	activation of MAPKK activity	48	0.024783	-0.00234985	-0.00412452	0.0136724
GO:0000187	activation of MAPK activity	136	0.0352024	0.0239216	0.00297529	-0.0153905
GO:0000188	inactivation of MAPK activity	23	0.0444242	-0.00767667	0.0745257	-0.0405437
GO:0000209	protein polyubiquitination	230	0.0335854	0.0188044	0.0119443	0.0426509
GO:0000212	meiotic spindle organization	10	0.0477998	0.0137213	0.167587	0.200028
GO:0000226	microtubule cytoskeleton organization	456	0.0299454	0.0153042	0.0500798	0.0139498
GO:0000244	spliceosomal tri-snRNP complex assembly	15	0.0157765	0.0156291	-0.0466284	-0.00815904
GO:0000245	spliceosomal complex assembly	59	0.0247867	0.0111637	0.0204968	0.0184676
GO:0000266	mitochondrial fission	30	0.0291238	-0.00115037	0.0430558	0.00179646
GO:0000271	polysaccharide biosynthetic process	63	0.0410014	0.0254176	0.10211	0.05998
GO:0000272	polysaccharide catabolic process	16	0.0406407	0.0378545	0.0354189	0.091516
GO:0000280	nuclear division	343	0.0303516	0.0255121	0.0112143	0.0120264
GO:0000281	mitotic cytokinesis	80	0.00856826	0.0109238	0.0417039	0.063264
GO:0000288	nuclear-transcribed mRNA catabolic process, deadenylation-dependent decay	65	-0.00298831	0.0127315	0.0107012	-0.0238673
GO:0000289	nuclear-transcribed mRNA poly(A) tail shortening	29	0.00936917	0.00572728	0.00168406	0.00776416
GO:0000291	nuclear-transcribed mRNA catabolic process, exonucleolytic	33	-0.0140538	0.0202646	0.0152619	-0.0431412
GO:0000302	response to reactive oxygen species	188	0.0150473	0.00994341	-0.00718262	0.0283801
GO:0000303	response to superoxide	25	0.0394034	0.0252061	-0.00648049	0.0880128
GO:0000305	response to oxygen radical	26	0.0285193	0.0271649	0.0117683	0.0958691
GO:0000375	RNA splicing, via transesterification reactions	309	0.0256934	0.0174841	0.00801248	0.0652791
GO:0000377	RNA splicing, via transesterification reactions with bulged adenosine as nucleophile	306	0.0258294	0.0173953	0.00753841	0.0643136
GO:0000380	alternative mRNA splicing, via spliceosome	71	0.0345564	0.0143069	0.0204968	0.0328353
GO:0000381	regulation of alternative mRNA splicing, via spliceosome	61	0.0380018	0.00506615	0.0241384	0.0472379
GO:0000387	spliceosomal snRNP assembly	36	0.0354612	0.0177504	0.0731898	-0.0154823
GO:0000394	RNA splicing, via endonucleolytic cleavage and ligation	11	-0.00881382	-0.0352553	0.0873822	-0.0355116
GO:0000395	mRNA 5'-splice site recognition	11	0.0345564	0.0377525	0.135029	0.162199
GO:0000398	mRNA splicing, via spliceosome	306	0.0258294	0.0173953	0.00753841	0.0643136
GO:0000413	protein peptidyl-prolyl isomerization	31	0.0272084	0.0283417	0.0965295	0.0507094
GO:0000422	autophagy of mitochondrion	66	0.0434344	0.0120855	-0.0383137	-0.0235477
GO:0000423	mitophagy	18	0.0273519	0.00464114	-0.0659569	-0.116558
GO:0000460	maturation of 5.8S rRNA	23	-0.00477525	0.00755578	-0.0971125	-0.0363713
GO:0000462	maturation of SSU-rRNA from tricistronic rRNA transcript (SSU-rRNA, 5.8S rRNA, LSU-rRNA)	31	0.0388065	0.0107859	0.0439709	-0.0234122
GO:0000463	maturation of LSU-rRNA from tricistronic rRNA transcript (SSU-rRNA, 5.8S rRNA, LSU-rRNA)	12	0.0443033	0.0163809	-0.133717	-0.018769
GO:0000466	maturation of 5.8S rRNA from tricistronic rRNA transcript (SSU-rRNA, 5.8S rRNA, LSU-rRNA)	19	0.0128864	0.0125086	-0.105481	-0.0234122
GO:0000469	cleavage involved in rRNA processing	19	-0.00187006	0.00351344	-0.0823139	-0.0234122
GO:0000470	maturation of LSU-rRNA	18	0.0526789	0.0163809	-0.108263	0.0312116
GO:0000478	endonucleolytic cleavage involved in rRNA processing	10	-0.0125917	-0.00733477	-0.122035	-0.140002
GO:0000479	endonucleolytic cleavage of tricistronic rRNA transcript (SSU-rRNA, 5.8S rRNA, LSU-rRNA)	10	-0.0125917	-0.00733477	-0.122035	-0.140002
GO:0000491	small nucleolar ribonucleoprotein complex assembly	11	0.0517684	0.0816062	0.156772	0.227219
GO:0000578	embryonic axis specification	21	0.0524673	0.0233058	0.0860252	0.0484857
GO:0000712	resolution of meiotic recombination intermediates	14	0.0264943	0.0160107	-0.11137	-0.0265985
GO:0000715	nucleotide-excision repair, DNA damage recognition	21	0.0362224	0.00278431	-0.0429804	0.024278
GO:0000722	telomere maintenance via recombination	12	0.0613813	0.0642336	0.134851	-0.0111769
GO:0000723	telomere maintenance	137	0.0212846	0.0297018	-0.0235638	0.0804992
GO:0000724	double-strand break repair via homologous recombination	107	0.0317456	-0.00100114	-0.0612633	0.0309157
GO:0000725	recombinational repair	108	0.0326447	-0.00105025	-0.0593561	0.0307785
GO:0000726	non-recombinational repair	77	0.0212846	0.00598796	-0.0711318	0.0252083
GO:0000729	DNA double-strand break processing	20	0.0288253	0.00415568	-0.0362118	0.169473
GO:0000731	DNA synthesis involved in DNA repair	42	0.00959206	0.0167153	-0.0535157	0.0442999
GO:0000737	DNA catabolic process, endonucleolytic	30	0.00831136	0.0233455	0.0382631	0.0740129
GO:0000768	syncytium formation by plasma membrane fusion	44	0.0429584	0.0200625	0.0327122	0.0925757
GO:0000819	sister chromatid segregation	161	0.0381265	0.0226182	0.0100974	0.0160537
GO:0000910	cytokinesis	141	0.0232454	0.0137893	0.0278942	0.0516278
GO:0000921	septin ring assembly	15	0.0676658	0.0500495	-0.0252004	0.223989
GO:0000956	nuclear-transcribed mRNA catabolic process	186	0.0168229	0.0106933	0.0295097	0.00729554
GO:0000959	mitochondrial RNA metabolic process	36	0.0114017	0.00803179	0.0312708	-0.0092024
GO:0000963	mitochondrial RNA processing	14	0.00659053	0.00293353	0.0426046	-0.0993642
GO:0000966	RNA 5'-end processing	17	0.0162789	0.0113752	-0.105481	0.0998126
GO:0001101	response to acid chemical	294	0.034613	0.0271574	0.0220858	0.0348109
GO:0001325	formation of extrachromosomal circular DNA	13	0.000857581	0.0170572	-0.0373477	-0.0177889
GO:0001501	skeletal system development	430	0.0301608	0.0238555	0.0276423	0.0372704
GO:0001502	cartilage condensation	16	0.0394034	0.0426675	0.0973673	0.11334
GO:0001503	ossification	324	0.0351552	0.0286421	0.0480047	0.0364881
GO:0001504	neurotransmitter uptake	37	0.0274917	-0.00250852	0.0290872	-0.111599
GO:0001505	regulation of neurotransmitter levels	307	0.0409032	0.0252061	0.0496611	0.00350994
GO:0001508	action potential	114	0.0445319	0.0288574	0.0193345	0.0421712
GO:0001510	RNA methylation	72	0.010903	0.0175049	-0.00772323	-0.0203816
GO:0001516	prostaglandin biosynthetic process	22	0.0284475	0.0394827	0.0552026	0.0687682
GO:0001522	pseudouridine synthesis	13	0.0515002	0.0378885	-0.0980663	0.159305
GO:0001523	retinoid metabolic process	69	0.0232642	0.00486214	0.0309141	0.0369443
GO:0001525	angiogenesis	439	0.0233058	0.0162223	0.0226307	0.00906766
GO:0001539	cilium or flagellum-dependent cell motility	33	0.0194977	-0.0131093	0.0725752	-0.0382782
GO:0001541	ovarian follicle development	50	0.00631474	0.0105894	-0.0235629	-0.00941558
GO:0001556	oocyte maturation	17	0.0299209	0.030344	0.0745257	-0.0480123
GO:0001558	regulation of cell growth	370	0.0295412	0.0194429	0.0295523	0.0177302
GO:0001562	response to protozoan	16	0.0454442	0.0306292	-0.0493346	-0.00557548
GO:0001569	branching involved in blood vessel morphogenesis	27	0.00107292	0.00523993	-0.0235638	-0.0283124
GO:0001570	vasculogenesis	67	0.0238952	0.00340388	-0.00046223	-0.026436
GO:0001573	ganglioside metabolic process	16	-0.01245	0.014118	-0.0946939	-0.0187132
GO:0001578	microtubule bundle formation	76	0.0286666	0.00701554	-0.0185256	-0.0274104
GO:0001580	detection of chemical stimulus involved in sensory perception of bitter taste	27	0.016022	0.000785801	-0.0346555	0.121927
GO:0001649	osteoblast differentiation	181	0.0306765	0.02861	0.0591015	0.0198292
GO:0001654	eye development	312	0.0277373	0.0123235	0.0186288	0.0139767
GO:0001655	urogenital system development	282	0.0267569	0.00646208	0.0354197	-0.00912548
GO:0001656	metanephros development	78	0.0190897	0.000557239	0.0177462	-0.0286956
GO:0001657	ureteric bud development	81	0.0356293	0.0165207	0.0182313	-0.0283124
GO:0001658	branching involved in ureteric bud morphogenesis	50	0.027163	0.0123405	-0.0977885	-0.0286956
GO:0001659	temperature homeostasis	154	0.0182774	0.00825091	0.0194265	-0.00691798
GO:0001662	behavioral fear response	32	0.0176239	0.00164905	-0.14533	0.0301248
GO:0001666	response to hypoxia	273	0.0281755	0.0286137	0.0618387	0.0420629
GO:0001667	ameboidal-type cell migration	339	0.0333777	0.0228525	0.0382231	-0.0158411
GO:0001675	acrosome assembly	10	0.0380962	-0.00190972	-0.0150518	-0.0339873
GO:0001676	long-chain fatty acid metabolic process	85	0.037488	0.0285873	0.0981411	0.070794
GO:0001678	cellular glucose homeostasis	123	0.0578017	0.0290935	0.0486487	-0.00397096
GO:0001696	gastric acid secretion	17	0.0556823	0.0243636	0.149717	0.0581097
GO:0001701	in utero embryonic development	277	0.0342315	0.0209408	0.0307126	0.0210954
GO:0001702	gastrulation with mouth forming second	23	0.00231962	0.00958829	-0.18864	-0.0133385
GO:0001704	formation of primary germ layer	100	0.0204516	0.0167644	0.0013819	0.036523
GO:0001706	endoderm formation	46	0.0183624	0.0203099	0.010955	0.036523
GO:0001707	mesoderm formation	59	0.0216851	0.0091765	-0.0538739	-0.0049319
GO:0001708	cell fate specification	76	0.0241237	0.0195808	0.00183743	0.0460404
GO:0001709	cell fate determination	36	0.0352364	0.0219703	0.0868557	0.0869553
GO:0001710	mesodermal cell fate commitment	17	-0.00359277	0.0091765	-0.102105	-0.0449187
GO:0001711	endodermal cell fate commitment	13	0.0293731	0.0829625	0.0864801	0.0779456
GO:0001732	formation of cytoplasmic translation initiation complex	11	0.0452251	0.00455614	-0.0644617	0.0522271
GO:0001736	establishment of planar polarity	72	0.0423029	0.0376845	0.0918473	0.0633817
GO:0001738	morphogenesis of a polarized epithelium	87	0.0402081	0.0328336	0.0892837	0.0553003
GO:0001754	eye photoreceptor cell differentiation	36	0.0366455	0.0222121	-0.0884229	0.0366949
GO:0001755	neural crest cell migration	52	0.0293523	0.0157292	0.0596421	0.0187314
GO:0001756	somitogenesis	61	0.0342315	0.0343108	0.029551	0.0951221
GO:0001759	organ induction	19	0.0293391	0.0133435	-0.0719686	0.035116
GO:0001763	morphogenesis of a branching structure	168	0.0173235	0.0199019	0.0154394	0.00338115
GO:0001764	neuron migration	133	0.0350853	0.00491504	-0.00814949	0.0182679
GO:0001767	establishment of lymphocyte polarity	11	0.058512	0.0760187	0.115131	0.124752
GO:0001768	establishment of T cell polarity	10	0.0601893	0.0775733	0.0882429	0.111493
GO:0001771	immunological synapse formation	10	0.0248264	0.0454518	0.0194849	-0.00267192
GO:0001773	myeloid dendritic cell activation	26	0.0402534	0.0562698	0.0759486	0.0837429
GO:0001774	microglial cell activation	24	0.0354007	0.0399474	0.103182	0.0706162
GO:0001776	leukocyte homeostasis	77	0.036468	0.0237025	0.00368454	0.0956914
GO:0001779	natural killer cell differentiation	19	0.0245525	0.0369175	0.104128	0.0887261
GO:0001780	neutrophil homeostasis	14	0.0231169	0.0490748	-0.0939575	0.0318371
GO:0001782	B cell homeostasis	29	0.0390974	0.0203779	0.0173081	0.108424
GO:0001783	B cell apoptotic process	22	0.0474597	0.018115	-0.0373223	0.0171703
GO:0001818	negative regulation of cytokine production	218	0.025004	0.017809	-0.00655863	0.0425108
GO:0001819	positive regulation of cytokine production	348	0.0210901	0.0227353	-0.00386679	0.0191708
GO:0001821	histamine secretion	10	0.0233927	0.0123594	0.11969	0.0756435
GO:0001822	kidney development	242	0.0255423	0.00450325	0.0424276	-0.0219892
GO:0001823	mesonephros development	86	0.0333361	0.0149321	0.0186503	-0.018843
GO:0001824	blastocyst development	56	0.0482153	0.0201588	0.0373418	0.0203016
GO:0001825	blastocyst formation	27	0.0353611	0.0144051	0.0540013	-0.0165381
GO:0001829	trophectodermal cell differentiation	13	0.0388065	0.0232	0.104528	-0.0161665
GO:0001832	blastocyst growth	13	0.0428564	0.0199397	0.0693855	0.0100189
GO:0001836	release of cytochrome c from mitochondria	49	0.0194637	0.0144013	0.0244085	-0.0727488
GO:0001837	epithelial to mesenchymal transition	122	0.0399946	0.0235004	0.0724676	0.00957093
GO:0001838	embryonic epithelial tube formation	109	0.0228865	0.01643	0.0797517	-0.00793792
GO:0001841	neural tube formation	92	0.0165812	0.00890449	0.0577188	-0.0303851
GO:0001843	neural tube closure	81	0.0136986	0.00935028	0.029551	-0.0293314
GO:0001844	protein insertion into mitochondrial membrane involved in apoptotic signaling pathway	24	0.00325465	0.033049	0.0412642	0.119712
GO:0001845	phagolysosome assembly	11	0.0725053	0.0337668	-0.0198901	0.129191
GO:0001867	complement activation, lectin pathway	10	-0.00162071	0.0420838	-0.0463818	-0.0478489
GO:0001881	receptor recycling	31	0.029596	0.0281037	-0.0137813	0.0211949
GO:0001885	endothelial cell development	50	0.014951	0.0182	-0.00609235	0.0031834
GO:0001886	endothelial cell morphogenesis	12	0.0508051	0.00763323	0.229863	0.00293911
GO:0001889	liver development	124	0.0302118	0.0237422	0.0352714	0.0539378
GO:0001890	placenta development	130	0.0256349	0.0257161	0.0344138	0.0439606
GO:0001892	embryonic placenta development	76	0.0293712	0.0383909	0.117343	0.0455999
GO:0001893	maternal placenta development	29	0.0252665	0.00621841	-0.0164775	-0.0436592
GO:0001894	tissue homeostasis	184	0.0247131	0.0144221	0.0266219	-0.0225315
GO:0001895	retina homeostasis	57	0.0329054	0.000785801	0.00949745	-0.0537962
GO:0001906	cell killing	118	0.0167568	0.0233266	0.0276627	0.0136696
GO:0001909	leukocyte mediated cytotoxicity	83	0.0304196	0.0325276	0.0307874	0.0326086
GO:0001910	regulation of leukocyte mediated cytotoxicity	61	0.033287	0.0343032	0.0307874	0.0292748
GO:0001911	negative regulation of leukocyte mediated cytotoxicity	14	0.0301967	0.029749	0.137145	-0.0493314
GO:0001912	positive regulation of leukocyte mediated cytotoxicity	42	0.036213	0.0334154	0.0397503	0.0256261
GO:0001913	T cell mediated cytotoxicity	39	0.0350135	0.0510695	0.0396569	-0.0374723
GO:0001914	regulation of T cell mediated cytotoxicity	26	0.0457597	0.0537065	0.0397503	0.0533709
GO:0001916	positive regulation of T cell mediated cytotoxicity	19	0.047167	0.0535856	0.0398436	0.020166
GO:0001919	regulation of receptor recycling	22	0.038678	0.019305	0.0826401	0.0108407
GO:0001921	positive regulation of receptor recycling	13	0.0845379	0.0392296	0.115829	-0.00793792
GO:0001933	negative regulation of protein phosphorylation	359	0.0350135	0.0222556	0.0421422	0.0329246
GO:0001935	endothelial cell proliferation	123	0.0333777	0.00792224	0.0307126	-0.0212174
GO:0001936	regulation of endothelial cell proliferation	110	0.0342315	0.00887804	0.0553205	-0.0186616
GO:0001937	negative regulation of endothelial cell proliferation	35	0.0214962	-0.00169249	0.0288743	-0.0461225
GO:0001938	positive regulation of endothelial cell proliferation	81	0.042471	0.0201475	0.0797517	0.00571138
GO:0001941	postsynaptic membrane organization	36	0.049581	0.0400022	0.0765644	0.0752448
GO:0001942	hair follicle development	67	0.037352	0.0206197	0.0916235	0.035116
GO:0001945	lymph vessel development	24	0.052558	0.0127806	-0.138985	-0.0420329
GO:0001946	lymphangiogenesis	15	0.0687198	0.0201475	-0.0990881	0.00129155
GO:0001947	heart looping	51	0.00981118	0.00012467	0.0258294	-0.0314388
GO:0001952	regulation of cell-matrix adhesion	105	0.0369742	0.0188441	0.0635931	0.0378909
GO:0001953	negative regulation of cell-matrix adhesion	37	0.0115528	0.0105176	-0.00030686	0.0123355
GO:0001954	positive regulation of cell-matrix adhesion	45	0.0690221	0.0376429	0.0613549	0.0649731
GO:0001956	positive regulation of neurotransmitter secretion	22	0.056946	0.034919	0.0852271	0.0663321
GO:0001958	endochondral ossification	24	0.0630662	0.027639	0.112394	0.195707
GO:0001959	regulation of cytokine-mediated signaling pathway	136	0.033746	0.0162752	0.0261606	-0.0230513
GO:0001960	negative regulation of cytokine-mediated signaling pathway	49	0.0165774	-0.00476392	-0.0306384	-0.0146637
GO:0001961	positive regulation of cytokine-mediated signaling pathway	38	0.0505066	0.0130507	0.0729525	-0.119282
GO:0001963	synaptic transmission, dopaminergic	26	0.0133605	0.0283776	0.0186696	-0.0588256
GO:0001964	startle response	24	0.027605	0.0178959	0.0460057	0.0173054
GO:0001967	suckling behavior	10	-0.00147149	-0.0126144	-0.100314	-0.200388
GO:0001973	adenosine receptor signaling pathway	11	0.0407483	0.0203779	0.0502912	0.0845826
GO:0001974	blood vessel remodeling	34	0.0346225	-0.0234191	-0.00472159	0.016385
GO:0001975	response to amphetamine	31	0.0212431	0.0365813	0.0849568	0.0759443
GO:0001976	neurological system process involved in regulation of systemic arterial blood pressure	10	0.0390974	0.00969973	0.0524074	0.0251221
GO:0001977	renal system process involved in regulation of blood volume	12	0.0158879	0.00084247	-0.0355904	-0.0927772
GO:0001990	regulation of systemic arterial blood pressure by hormone	32	0.0109823	0.0120401	-0.0272881	-0.0549552
GO:0001991	regulation of systemic arterial blood pressure by circulatory renin-angiotensin	14	-0.0140443	-0.0263149	-0.0400642	0.0157829
GO:0002002	regulation of angiotensin levels in blood	10	0.00580284	-0.0345904	-0.0400642	0.0157829
GO:0002003	angiotensin maturation	10	0.00580284	-0.0345904	-0.0400642	0.0157829
GO:0002009	morphogenesis of an epithelium	412	0.0221875	0.0146393	0.0194716	0.00904265
GO:0002011	morphogenesis of an epithelial sheet	46	0.0251721	0.00243296	0.02248	-0.0151905
GO:0002021	response to dietary excess	22	0.0225899	0.0319723	0.0657512	0.0102201
GO:0002026	regulation of the force of heart contraction	25	0.0206802	0.00670953	0.0526303	-0.133752
GO:0002027	regulation of heart rate	84	0.035021	0.0194769	0.0658658	0.00794983
GO:0002028	regulation of sodium ion transport	78	0.047235	0.0203496	0.0659571	0.092788
GO:0002029	desensitization of G protein-coupled receptor signaling pathway	15	0.0481719	0.00187006	0.0451314	-0.073992
GO:0002031	G protein-coupled receptor internalization	12	0.0652857	-0.0267116	0.0683123	-0.0707451
GO:0002040	sprouting angiogenesis	109	0.0212582	0.0228525	0.0327254	-0.0449187
GO:0002042	cell migration involved in sprouting angiogenesis	56	0.015563	0.00316398	0.054515	-0.0492942
GO:0002043	blood vessel endothelial cell proliferation involved in sprouting angiogenesis	17	0.0350853	0.00792224	-0.094221	0.0506505
GO:0002052	positive regulation of neuroblast proliferation	18	0.0395677	0.0348284	-0.0812111	-0.034557
GO:0002053	positive regulation of mesenchymal cell proliferation	24	0.0293958	0.02286	-0.10797	0.114597
GO:0002062	chondrocyte differentiation	98	0.0213999	0.0170477	0.0925903	0.042293
GO:0002063	chondrocyte development	36	-0.0152079	-0.0068512	0.0600908	-0.0747933
GO:0002064	epithelial cell development	175	0.014662	0.019135	0.00963822	0.0130103
GO:0002065	columnar/cuboidal epithelial cell differentiation	95	0.0286024	-0.00525882	0.0596039	-0.0284328
GO:0002066	columnar/cuboidal epithelial cell development	52	0.0215038	-1.51116e-05	-0.00941287	-0.0413605
GO:0002067	glandular epithelial cell differentiation	38	0.0355858	-0.00360789	0.0750696	-0.0393324
GO:0002068	glandular epithelial cell development	23	0.0360335	0.000861359	0.109632	-0.0844553
GO:0002070	epithelial cell maturation	12	-0.0228619	0.00999819	0.0696778	0.0245616
GO:0002076	osteoblast development	17	0.0294184	0.0117606	-0.112438	0.113211
GO:0002082	regulation of oxidative phosphorylation	18	0.0347944	0.0356368	0.15752	-0.0318937
GO:0002087	regulation of respiratory gaseous exchange by neurological system process	11	0.0293731	0.0345866	-0.103707	0.0716969
GO:0002088	lens development in camera-type eye	60	0.0355008	0.00291275	0.0879092	0.0368104
GO:0002089	lens morphogenesis in camera-type eye	18	0.0447264	0.0256934	0.0855533	0.100214
GO:0002090	regulation of receptor internalization	44	0.0211996	-0.00211373	-0.0244618	-0.0707451
GO:0002092	positive regulation of receptor internalization	20	0.0187799	0.0199945	0.00743325	-0.0668056
GO:0002093	auditory receptor cell morphogenesis	13	0.0443978	-0.0422481	-0.0222916	-0.202943
GO:0002097	tRNA wobble base modification	19	0.0561092	0.0126635	0.0300615	-0.0311252
GO:0002098	tRNA wobble uridine modification	16	0.0566608	0.00914816	0.0190734	-0.0426613
GO:0002115	store-operated calcium entry	15	0.0648966	0.000642241	0.0208304	-0.104895
GO:0002181	cytoplasmic translation	83	0.0250247	0.0133888	-0.00138866	0.0416638
GO:0002183	cytoplasmic translational initiation	26	0.0405462	0.0133813	-0.100704	0.0401852
GO:0002200	somatic diversification of immune receptors	60	-0.00228562	0.0299757	0.100356	-0.00822952
GO:0002204	somatic recombination of immunoglobulin genes involved in immune response	43	-0.00143182	0.0271026	0.059485	-0.0339409
GO:0002208	somatic diversification of immunoglobulins involved in immune response	43	-0.00143182	0.0271026	0.059485	-0.0339409
GO:0002209	behavioral defense response	32	0.0176239	0.00164905	-0.14533	0.0301248
GO:0002218	activation of innate immune response	204	0.0350305	0.0243825	0.0163899	0.0364924
GO:0002220	innate immune response activating cell surface receptor signaling pathway	56	0.0456407	0.0157519	0.00523642	-0.0489456
GO:0002221	pattern recognition receptor signaling pathway	144	0.0260712	0.0284891	0.030658	0.0449998
GO:0002223	stimulatory C-type lectin receptor signaling pathway	53	0.0456596	0.0215718	0.00629974	-0.0486131
GO:0002224	toll-like receptor signaling pathway	104	0.0231811	0.0252099	0.0457585	0.0272992
GO:0002227	innate immune response in mucosa	16	0.000640352	-0.0127976	-0.174063	-0.0369377
GO:0002228	natural killer cell mediated immunity	49	0.0299738	0.0153307	0.030017	0.0152924
GO:0002230	positive regulation of defense response to virus by host	23	0.0556408	0.0143069	0.0396569	-0.0432295
GO:0002237	response to molecule of bacterial origin	280	0.0226711	0.0163035	0.0111792	-0.0116819
GO:0002244	hematopoietic progenitor cell differentiation	95	0.0169627	0.015478	-0.0194024	-0.0236482
GO:0002250	adaptive immune response	308	0.0180205	0.0163998	-0.0141153	0.00393151
GO:0002251	organ or tissue specific immune response	25	-0.00219873	-0.00476392	-0.221118	-0.0338113
GO:0002253	activation of immune response	444	0.0322009	0.0232265	0.0199458	0.0290324
GO:0002260	lymphocyte homeostasis	57	0.0429622	0.018965	0.029503	0.0956914
GO:0002262	myeloid cell homeostasis	137	0.0191841	0.0165245	-0.014734	0.0259178
GO:0002269	leukocyte activation involved in inflammatory response	24	0.0354007	0.0399474	0.103182	0.0706162
GO:0002275	myeloid cell activation involved in immune response	453	0.0388972	0.0263206	0.0369075	0.0109411
GO:0002279	mast cell activation involved in immune response	39	0.032437	0.0238272	0.045756	-0.0049319
GO:0002283	neutrophil activation involved in immune response	409	0.0388972	0.0268948	0.0398189	0.0144331
GO:0002285	lymphocyte activation involved in immune response	136	0.0245412	0.0233776	-0.014444	0.0266243
GO:0002286	T cell activation involved in immune response	74	0.0257388	0.0233776	-0.0315247	0.0206233
GO:0002287	alpha-beta T cell activation involved in immune response	50	0.0119476	0.0228997	-0.0653519	0.0122059
GO:0002292	T cell differentiation involved in immune response	53	0.0123424	0.0222631	-0.0539518	0.0172729
GO:0002293	alpha-beta T cell differentiation involved in immune response	50	0.0119476	0.0228997	-0.0653519	0.0122059
GO:0002294	CD4-positive, alpha-beta T cell differentiation involved in immune response	49	0.0115528	0.0235363	-0.0547036	0.0172729
GO:0002295	T-helper cell lineage commitment	14	-0.0118229	0.0359051	-0.0527188	0.122973
GO:0002312	B cell activation involved in immune response	63	0.0252779	0.0322707	0.059485	0.0189434
GO:0002313	mature B cell differentiation involved in immune response	16	0.066353	0.0702574	0.102697	0.116554
GO:0002320	lymphoid progenitor cell differentiation	18	0.0134663	0.0120798	-0.0197735	-0.0245269
GO:0002323	natural killer cell activation involved in immune response	15	0.00664909	0.0213224	-0.0422569	0.0298945
GO:0002328	pro-B cell differentiation	11	0.0144542	-0.0158105	0.0176338	-0.00413509
GO:0002335	mature B cell differentiation	19	0.0568761	0.0626374	0.0300282	0.108424
GO:0002347	response to tumor cell	19	0.0224747	0.0343032	0.0440244	0.0415992
GO:0002360	T cell lineage commitment	23	0.00981118	0.0670009	-0.0522949	0.148141
GO:0002363	alpha-beta T cell lineage commitment	17	-0.0132491	0.0500193	-0.0531427	0.147697
GO:0002367	cytokine production involved in immune response	78	0.0346905	0.00555161	-0.034977	-0.0232294
GO:0002369	T cell cytokine production	28	0.0202948	0.0328979	-0.0117046	-0.0725333
GO:0002374	cytokine secretion involved in immune response	15	0.020752	0.0263168	-0.0764442	0.0705831
GO:0002377	immunoglobulin production	84	0.00406501	0.033015	0.0429329	0.00304788
GO:0002381	immunoglobulin production involved in immunoglobulin mediated immune response	46	-0.00228562	0.0178638	-0.0291839	-0.00935487
GO:0002385	mucosal immune response	23	-0.00218362	-0.00476392	-0.222169	-0.0400642
GO:0002407	dendritic cell chemotaxis	19	-0.00530038	0.0419724	-0.0831077	0.0184487
GO:0002418	immune response to tumor cell	15	0.0215038	0.0105176	0.0440244	-0.00231666
GO:0002429	immune response-activating cell surface receptor signaling pathway	262	0.0287214	0.023761	0.00523642	0.0271131
GO:0002431	Fc receptor mediated stimulatory signaling pathway	80	0.0391106	0.0171403	0.0332701	-0.0361433
GO:0002433	immune response-regulating cell surface receptor signaling pathway involved in phagocytosis	75	0.0425126	0.0249454	0.0347714	-0.0246855
GO:0002437	inflammatory response to antigenic stimulus	35	0.00535705	0.0160825	0.0307874	-0.00826655
GO:0002438	acute inflammatory response to antigenic stimulus	18	-0.00697587	0.0135891	0.0284892	-0.0106503
GO:0002440	production of molecular mediator of immune response	156	0.0237554	0.0223821	-0.00911637	-0.00150445
GO:0002444	myeloid leukocyte mediated immunity	460	0.0390823	0.0269024	0.034476	0.0109158
GO:0002446	neutrophil mediated immunity	417	0.0392674	0.0269099	0.0393819	0.0144331
GO:0002448	mast cell mediated immunity	41	0.0329999	0.0210617	0.045756	0.0148191
GO:0002449	lymphocyte mediated immunity	192	0.0256972	0.0198075	0.0271878	-0.00854173
GO:0002455	humoral immune response mediated by circulating immunoglobulin	34	0.0343184	0.0209767	0.0447063	-0.00749645
GO:0002456	T cell mediated immunity	81	0.0269779	0.0320365	0.0184995	-0.0507431
GO:0002460	adaptive immune response based on somatic recombination of immune receptors built from immunoglobulin superfamily domains	208	0.0188876	0.0198075	0.00041419	-0.00889392
GO:0002467	germinal center formation	15	0.0115528	0.018965	0.0357075	0.0536283
GO:0002474	antigen processing and presentation of peptide antigen via MHC class I	42	0.0347339	-0.00275597	-0.00140163	0.0152561
GO:0002475	antigen processing and presentation via MHC class Ib	12	0.0317607	0.0359466	0.0091589	0.0426542
GO:0002478	antigen processing and presentation of exogenous peptide antigen	111	0.0295393	0.00951651	0.014031	0.0144729
GO:0002479	antigen processing and presentation of exogenous peptide antigen via MHC class I, TAP-dependent	23	0.0329999	0.0119192	0.0199771	0.049665
GO:0002483	antigen processing and presentation of endogenous peptide antigen	12	0.0590239	0.061897	0.0299104	0.0426542
GO:0002495	antigen processing and presentation of peptide antigen via MHC class II	89	0.0308238	0.00925205	0.014031	-0.00248082
GO:0002504	antigen processing and presentation of peptide or polysaccharide antigen via MHC class II	90	0.0301816	0.00878359	-0.00277836	0.000825093
GO:0002507	tolerance induction	19	0.0418099	-0.0185797	-0.0133706	-0.0754046
GO:0002521	leukocyte differentiation	417	0.032437	0.0271593	0.0184995	0.0321586
GO:0002526	acute inflammatory response	117	0.0364	0.02861	0.0317689	0.0288295
GO:0002532	production of molecular mediator involved in inflammatory response	49	0.0114357	-0.000766912	-0.0133706	-0.0290852
GO:0002534	cytokine production involved in inflammatory response	33	0.00396301	-0.00139026	-0.0938887	-0.0680406
GO:0002544	chronic inflammatory response	16	0.0349247	0.0435572	0.00503628	0.0994516
GO:0002548	monocyte chemotaxis	42	0.0219382	0.0260731	0.00423832	0.063393
GO:0002551	mast cell chemotaxis	10	0.0496283	0.0798268	-0.0337177	0.123926
GO:0002562	somatic diversification of immune receptors via germline recombination within a single locus	53	-0.00162071	0.0271026	0.126917	-0.0161058
GO:0002566	somatic diversification of immune receptors via somatic mutation	13	-0.0319798	0.0521009	0.142195	-0.0668408
GO:0002573	myeloid leukocyte differentiation	166	0.0360071	0.0378639	0.0376822	0.0528915
GO:0002576	platelet degranulation	107	0.0406765	0.0106121	0.0456208	-0.0212174
GO:0002577	regulation of antigen processing and presentation	15	0.0308238	0.0428639	0.0613549	0.0191711
GO:0002637	regulation of immunoglobulin production	52	0.00883837	0.0273916	0.0698332	-0.0301884
GO:0002638	negative regulation of immunoglobulin production	10	0.0440483	0.0456785	0.0592559	0.0101975
GO:0002639	positive regulation of immunoglobulin production	36	-0.0185664	0.014424	0.0429329	-0.0211191
GO:0002643	regulation of tolerance induction	14	0.0404536	-0.0083208	-0.105702	-0.0966856
GO:0002673	regulation of acute inflammatory response	66	0.0240425	0.0161788	0.0371083	-0.000138657
GO:0002674	negative regulation of acute inflammatory response	10	0.0122385	0.00442958	-0.00056095	-0.0252532
GO:0002675	positive regulation of acute inflammatory response	22	-0.000130337	0.0254479	0.0330832	-0.000908763
GO:0002683	negative regulation of immune system process	359	0.0247074	0.0228525	0.0190692	-0.00672634
GO:0002685	regulation of leukocyte migration	143	0.0215038	0.0238272	-0.0144131	0.0292119
GO:0002686	negative regulation of leukocyte migration	35	0.0200719	0.0203779	-0.0311178	-0.0380017
GO:0002687	positive regulation of leukocyte migration	99	0.0186817	0.0310656	-0.0168241	0.0556115
GO:0002688	regulation of leukocyte chemotaxis	86	0.0322424	0.0414926	-0.0161417	0.0758424
GO:0002689	negative regulation of leukocyte chemotaxis	12	0.0580662	0.0350947	0.00176066	0.0281799
GO:0002690	positive regulation of leukocyte chemotaxis	69	0.0227202	0.0415681	-0.0168241	0.071463
GO:0002691	regulation of cellular extravasation	20	0.0235249	0.00182472	-0.00246341	-0.130434
GO:0002693	positive regulation of cellular extravasation	11	0.0200719	0.0207973	0.028196	-0.15456
GO:0002694	regulation of leukocyte activation	409	0.020752	0.0238272	0.0317689	0.0219774
GO:0002695	negative regulation of leukocyte activation	138	0.0184947	0.0212185	0.0434445	-0.0103636
GO:0002696	positive regulation of leukocyte activation	256	0.0199718	0.0196564	0.012816	0.017682
GO:0002697	regulation of immune effector process	304	0.0310996	0.0213847	0.0110476	0.0150389
GO:0002698	negative regulation of immune effector process	89	0.032437	0.0232416	0.0327254	0.0024654
GO:0002699	positive regulation of immune effector process	170	0.0201532	0.0217115	-0.014444	0.0187194
GO:0002700	regulation of production of molecular mediator of immune response	108	0.0210901	0.0223821	-0.0151597	-0.0123096
GO:0002701	negative regulation of production of molecular mediator of immune response	27	0.0391616	0.0130791	-0.0539518	-0.0374723
GO:0002702	positive regulation of production of molecular mediator of immune response	74	0.011447	0.0263262	-0.0521413	-0.00467659
GO:0002703	regulation of leukocyte mediated immunity	159	0.0224747	0.0158634	0.0244085	-0.0130341
GO:0002704	negative regulation of leukocyte mediated immunity	38	0.0205725	0.00586329	0.0714822	-0.05278
GO:0002705	positive regulation of leukocyte mediated immunity	104	0.01507	0.0207066	0.0242178	-0.0211191
GO:0002706	regulation of lymphocyte mediated immunity	119	0.0215038	0.0223802	0.0244085	-0.00897093
GO:0002707	negative regulation of lymphocyte mediated immunity	29	0.0222442	0.00842847	0.118098	-0.052287
GO:0002708	positive regulation of lymphocyte mediated immunity	83	0.0163545	0.0271026	0.0232803	-0.00231666
GO:0002709	regulation of T cell mediated immunity	53	0.0269779	0.0430982	-0.00165932	-0.00897093
GO:0002710	negative regulation of T cell mediated immunity	14	0.0301967	0.0410279	0.0564948	-0.0453727
GO:0002711	positive regulation of T cell mediated immunity	35	0.0163545	0.0500193	0.0184995	-0.00826655
GO:0002712	regulation of B cell mediated immunity	44	-0.00790335	-0.0146412	0.0275246	-0.0384539
GO:0002714	positive regulation of B cell mediated immunity	31	-0.0200644	-0.0191728	0.0317689	-0.0394355
GO:0002715	regulation of natural killer cell mediated immunity	37	0.032437	0.0158634	0.0440244	0.0120467
GO:0002716	negative regulation of natural killer cell mediated immunity	10	0.0312054	-1.32226e-05	0.0794161	-0.0532907
GO:0002717	positive regulation of natural killer cell mediated immunity	26	0.0299436	0.0239499	0.0469339	0.0256261
GO:0002718	regulation of cytokine production involved in immune response	62	0.0256217	0.00777868	-0.0680221	-0.000324099
GO:0002719	negative regulation of cytokine production involved in immune response	19	0.0390974	-0.0133851	-0.0706607	-0.0723774
GO:0002720	positive regulation of cytokine production involved in immune response	38	0.0228468	0.0331434	-0.0775344	0.0133075
GO:0002724	regulation of T cell cytokine production	20	-0.0107141	0.0389255	-0.034517	-0.0725333
GO:0002726	positive regulation of T cell cytokine production	13	-0.00890071	0.058138	-0.00854911	0.00644903
GO:0002739	regulation of cytokine secretion involved in immune response	13	0.020752	-0.00332454	-0.129052	0.0639902
GO:0002753	cytoplasmic pattern recognition receptor signaling pathway	53	0.0464983	0.0337592	0.0658706	0.0918672
GO:0002755	MyD88-dependent toll-like receptor signaling pathway	32	0.0282907	0.0361487	0.0340504	0.0449998
GO:0002756	MyD88-independent toll-like receptor signaling pathway	22	0.0469176	0.0524957	0.110545	0.00552507
GO:0002757	immune response-activating signal transduction	384	0.0260221	0.0236723	0.0148609	0.0352588
GO:0002758	innate immune response-activating signal transduction	186	0.0304234	0.0232265	0.0163899	0.0292472
GO:0002761	regulation of myeloid leukocyte differentiation	95	0.0350853	0.0337592	0.0144886	-0.0117562
GO:0002762	negative regulation of myeloid leukocyte differentiation	41	0.03691	0.0255348	0.0144886	-0.0462701
GO:0002763	positive regulation of myeloid leukocyte differentiation	42	0.0258483	0.0344052	0.0583149	0.0311565
GO:0002764	immune response-regulating signaling pathway	405	0.0284135	0.0225767	0.0161685	0.0354278
GO:0002768	immune response-regulating cell surface receptor signaling pathway	283	0.0302307	0.0223802	0.0103305	0.027675
GO:0002790	peptide secretion	498	0.0340067	0.0246016	0.0396566	0.0151928
GO:0002791	regulation of peptide secretion	397	0.0320478	0.0235363	0.030005	0.00578439
GO:0002792	negative regulation of peptide secretion	113	0.0283946	0.0235363	0.0190692	0.0572251
GO:0002793	positive regulation of peptide secretion	224	0.0300116	0.0199718	0.0338286	-0.0142046
GO:0002819	regulation of adaptive immune response	132	0.0101229	0.0213791	0.0275246	-0.01457
GO:0002820	negative regulation of adaptive immune response	33	0.00612396	0.0223802	0.0432508	-0.052287
GO:0002821	positive regulation of adaptive immune response	85	0.00849648	0.0271026	0.0232803	-0.00231666
GO:0002822	regulation of adaptive immune response based on somatic recombination of immune receptors built from immunoglobulin superfamily domains	121	0.0115528	0.0223802	0.0232803	-0.00897093
GO:0002823	negative regulation of adaptive immune response based on somatic recombination of immune receptors built from immunoglobulin superfamily domains	32	0.00883837	0.0183303	0.0585233	-0.0448797
GO:0002824	positive regulation of adaptive immune response based on somatic recombination of immune receptors built from immunoglobulin superfamily domains	80	0.00324143	0.0273916	0.0192383	0.00206619
GO:0002825	regulation of T-helper 1 type immune response	22	-0.0220837	0.0245431	0.0115209	-0.018375
GO:0002827	positive regulation of T-helper 1 type immune response	15	-0.0203099	0.02861	0.0327254	0.0852852
GO:0002828	regulation of type 2 immune response	23	0.00612396	0.0024783	-0.0154593	0.00644903
GO:0002829	negative regulation of type 2 immune response	10	0.00496604	0.0108425	-0.0309893	0.0554267
GO:0002830	positive regulation of type 2 immune response	12	-0.0091765	0.0140141	-0.0362936	-0.126802
GO:0002831	regulation of response to biotic stimulus	110	0.023591	0.0300361	0.00965302	0.0494875
GO:0002832	negative regulation of response to biotic stimulus	37	0.0299738	0.0306614	-0.0105357	0.132375
GO:0002833	positive regulation of response to biotic stimulus	35	0.0138913	0.0315038	-0.00250108	0.0296193
GO:0002834	regulation of response to tumor cell	12	0.0262242	0.0387007	0.0469339	0.0196413
GO:0002837	regulation of immune response to tumor cell	12	0.0262242	0.0387007	0.0469339	0.0196413
GO:0002861	regulation of inflammatory response to antigenic stimulus	19	0.0104383	0.0110957	0.0613549	-0.0130341
GO:0002862	negative regulation of inflammatory response to antigenic stimulus	10	0.0123159	-0.00351155	0.072082	-0.0549249
GO:0002864	regulation of acute inflammatory response to antigenic stimulus	12	-0.00697587	0.0135891	0.0275246	-0.0252532
GO:0002886	regulation of myeloid leukocyte mediated immunity	43	0.0313754	-0.000766912	0.0232803	-0.0324163
GO:0002888	positive regulation of myeloid leukocyte mediated immunity	24	0.0225805	-0.00479036	0.0248306	-0.0725054
GO:0002889	regulation of immunoglobulin mediated immune response	44	-0.00790335	-0.0146412	0.0275246	-0.0384539
GO:0002891	positive regulation of immunoglobulin mediated immune response	31	-0.0200644	-0.0191728	0.0317689	-0.0394355
GO:0002902	regulation of B cell apoptotic process	17	0.0308238	0.015852	-0.0590021	0.0437425
GO:0002903	negative regulation of B cell apoptotic process	11	0.0724184	0.0222631	-0.0486237	0.0536283
GO:0002920	regulation of humoral immune response	46	0.0343184	0.0179242	0.0242031	0.00426618
GO:0002922	positive regulation of humoral immune response	13	-0.0214584	0.0130413	-0.0727532	-0.00826655
GO:0002931	response to ischemia	37	0.0274426	0.0317003	-0.0239747	0.0511859
GO:0002934	desmosome organization	10	0.0748702	-0.00642808	0.0463303	-0.14267
GO:0003002	regionalization	286	0.0281245	0.00670198	0.0209779	0.012799
GO:0003007	heart morphogenesis	219	0.0306765	-0.0023234	0.0258294	-0.0213187
GO:0003009	skeletal muscle contraction	33	0.0186666	-0.00636575	0.0250976	-0.0170912
GO:0003012	muscle system process	363	0.0232454	0.0179072	0.0199831	0.00460717
GO:0003013	circulatory system process	425	0.0279828	0.0144844	0.0425948	-0.0113618
GO:0003014	renal system process	101	0.0119684	0.0310958	0.0607441	0.109706
GO:0003015	heart process	214	0.0286534	0.0152891	0.0551236	-0.01007
GO:0003016	respiratory system process	26	0.0373936	0.0376656	-0.013536	0.0623451
GO:0003018	vascular process in circulatory system	139	0.0146204	0.0193579	0.0307874	-0.012607
GO:0003044	regulation of systemic arterial blood pressure mediated by a chemical signal	41	0.0363962	0.0197055	-0.0215424	0.027675
GO:0003071	renal system process involved in regulation of systemic arterial blood pressure	18	0.0244788	0.00525505	-0.068837	-0.0535486
GO:0003073	regulation of systemic arterial blood pressure	77	0.0280659	0.00862492	-0.0215424	-0.0213187
GO:0003081	regulation of systemic arterial blood pressure by renin-angiotensin	21	0.0320818	0.00444658	-0.03565	-0.111845
GO:0003084	positive regulation of systemic arterial blood pressure	13	0.0135248	-0.000200228	0.124732	-0.109674
GO:0003085	negative regulation of systemic arterial blood pressure	14	0.082698	0.0689578	0.0581761	0.0705735
GO:0003091	renal water homeostasis	31	0.00199473	0.0471934	0.0769256	0.179062
GO:0003094	glomerular filtration	16	-0.0207444	0.0085777	-0.068837	-0.0199174
GO:0003128	heart field specification	14	0.0349776	-0.00689465	0.0367625	0.0450796
GO:0003143	embryonic heart tube morphogenesis	57	0.00981118	0.00012467	0.0258294	-0.0314388
GO:0003148	outflow tract septum morphogenesis	25	0.0402194	-0.0261883	-0.0140279	-0.0283124
GO:0003149	membranous septum morphogenesis	10	0.0420026	-0.0269609	0.061457	-0.058939
GO:0003151	outflow tract morphogenesis	70	0.0295828	-0.00766912	-0.0181597	-0.042122
GO:0003156	regulation of animal organ formation	31	0.0274539	0.0197244	-0.0719686	0.0427395
GO:0003158	endothelium development	102	0.014951	0.0223084	-0.00476826	0.00939508
GO:0003159	morphogenesis of an endothelium	13	0.024749	0.0402081	-0.11336	0.127027
GO:0003161	cardiac conduction system development	12	0.0145827	0.0184021	0.0939167	-0.0119754
GO:0003170	heart valve development	48	0.032454	-0.00329432	0.0533639	0.0266194
GO:0003171	atrioventricular valve development	23	0.0524673	-0.00426524	-0.0417832	0.0303467
GO:0003174	mitral valve development	11	0.0754294	0.0228525	-0.0417832	0.108122
GO:0003176	aortic valve development	21	0.0306765	-0.0621576	0.0710203	-0.135973
GO:0003177	pulmonary valve development	18	0.035941	-0.047286	0.11163	-0.0506802
GO:0003179	heart valve morphogenesis	42	0.0500438	-0.00329432	-0.00180301	0.015111
GO:0003180	aortic valve morphogenesis	18	0.0288329	-0.0167814	-0.000474152	-0.0904457
GO:0003181	atrioventricular valve morphogenesis	21	0.066166	-0.00426524	-0.0417832	0.0303712
GO:0003183	mitral valve morphogenesis	10	0.0764286	0.0255839	-0.0947963	0.140047
GO:0003184	pulmonary valve morphogenesis	15	0.0524673	-0.0312394	0.0960215	-0.0449187
GO:0003188	heart valve formation	12	-0.024902	0.021279	-0.0947963	0.0303589
GO:0003197	endocardial cushion development	38	0.032454	-0.0263999	-0.108672	-0.0191702
GO:0003198	epithelial to mesenchymal transition involved in endocardial cushion formation	15	0.0342315	-0.0261883	-0.0926275	-0.0650504
GO:0003203	endocardial cushion morphogenesis	29	0.00456369	-0.0266115	-0.124717	0.022892
GO:0003205	cardiac chamber development	151	0.0388443	-0.00468836	0.0403328	-0.00975481
GO:0003206	cardiac chamber morphogenesis	115	0.0429584	-0.00426524	0.0657688	-0.00975481
GO:0003207	cardiac chamber formation	11	0.0357237	0.018965	0.0357075	-0.0650348
GO:0003208	cardiac ventricle morphogenesis	68	0.0382304	-0.0120024	0.0390751	-0.0449436
GO:0003209	cardiac atrium morphogenesis	27	0.0449418	0.00261052	0.00508784	-0.0103073
GO:0003214	cardiac left ventricle morphogenesis	14	0.0015716	-0.0285967	0.0443277	-0.0650426
GO:0003215	cardiac right ventricle morphogenesis	17	0.066166	-0.0373293	0.122629	0.022892
GO:0003222	ventricular trabecula myocardium morphogenesis	16	0.0443317	-0.0120024	0.0820171	-0.0101676
GO:0003229	ventricular cardiac muscle tissue development	52	0.0382304	-0.0120024	0.0568406	-0.0577913
GO:0003230	cardiac atrium development	31	0.0376165	0.00261052	0.00508784	-0.010028
GO:0003231	cardiac ventricle development	116	0.0382304	-0.0118172	0.0441225	-0.0101676
GO:0003254	regulation of membrane depolarization	38	0.0111391	0.0513056	0.000724891	0.17587
GO:0003264	regulation of cardioblast proliferation	10	0.0277165	0.0437631	-0.137828	0.138837
GO:0003272	endocardial cushion formation	21	0.0342315	-0.0195884	-0.0719686	-0.010028
GO:0003279	cardiac septum development	99	0.0476203	-0.0113526	0.0757186	0.00795661
GO:0003281	ventricular septum development	65	0.0476203	-0.0195884	0.0944109	-0.0393253
GO:0003283	atrial septum development	19	0.066166	-0.0113526	-0.00560278	0.0303467
GO:0003298	physiological muscle hypertrophy	21	0.0567024	0.0375787	-0.00560173	0.136031
GO:0003299	muscle hypertrophy in response to stress	21	0.024647	0.0213791	-0.017306	0.0801513
GO:0003300	cardiac muscle hypertrophy	74	0.013778	0.0177636	-0.00813792	-0.0260009
GO:0003301	physiological cardiac muscle hypertrophy	21	0.0567024	0.0375787	-0.00560173	0.136031
GO:0003309	type B pancreatic cell differentiation	20	0.0355858	-1.51116e-05	0.0573601	-0.064687
GO:0003323	type B pancreatic cell development	18	0.0362564	-1.51116e-05	-5.35794e-05	-0.110114
GO:0003333	amino acid transmembrane transport	73	0.0520669	0.0137477	0.0539212	0.0404033
GO:0003337	mesenchymal to epithelial transition involved in metanephros morphogenesis	13	0.0350135	0.039717	0.00508784	-0.0449187
GO:0003338	metanephros morphogenesis	28	0.0225975	-0.0114999	0.0111745	-0.0507115
GO:0003341	cilium movement	56	0.0192654	0.0209087	0.0643298	0.0331966
GO:0003351	epithelial cilium movement	21	0.0129544	0.0552743	0.0560844	0.158325
GO:0003352	regulation of cilium movement	13	-0.0207595	-0.0349493	0.179728	-0.174145
GO:0003356	regulation of cilium beat frequency	10	0.011889	-0.0416191	0.217132	-0.282542
GO:0003382	epithelial cell morphogenesis	29	0.0445187	0.024715	0.111874	0.0853476
GO:0003401	axis elongation	28	0.0146374	0.0167002	0.0209779	-0.0346331
GO:0003407	neural retina development	55	0.0417608	0.0197659	0.0565205	0.0121543
GO:0003413	chondrocyte differentiation involved in endochondral bone morphogenesis	23	-0.0161656	0.000612018	0.0525922	-0.0850012
GO:0003414	chondrocyte morphogenesis involved in endochondral bone morphogenesis	14	-0.0206613	-0.0177164	0.0194875	-0.144881
GO:0003416	endochondral bone growth	34	-0.00367589	-0.00672087	-0.0140897	-0.105303
GO:0003417	growth plate cartilage development	28	-0.00956751	-0.00672087	-0.00341412	-0.0999264
GO:0003418	growth plate cartilage chondrocyte differentiation	19	-0.0174199	-0.0140538	0.0317752	-0.141006
GO:0003422	growth plate cartilage morphogenesis	15	-0.0174199	-0.0140538	0.00719966	-0.141006
GO:0003429	growth plate cartilage chondrocyte morphogenesis	14	-0.0206613	-0.0177164	0.0194875	-0.144881
GO:0003433	chondrocyte development involved in endochondral bone morphogenesis	17	-0.0174199	-0.0213791	0.0317752	-0.148757
GO:0005513	detection of calcium ion	12	0.0810924	0.00284475	0.168069	-0.0924915
GO:0005975	carbohydrate metabolic process	482	0.0316436	0.0191822	0.0346626	0.0338897
GO:0005976	polysaccharide metabolic process	87	0.0410014	0.0184172	0.0644828	0.0451041
GO:0005977	glycogen metabolic process	57	0.0644697	0.0160825	0.103017	0.00445622
GO:0005978	glycogen biosynthetic process	39	0.0557768	0.0262677	0.119087	0.0429947
GO:0005979	regulation of glycogen biosynthetic process	24	0.0660829	0.0357237	0.284073	0.0809228
GO:0005980	glycogen catabolic process	13	0.0644697	0.015376	0.10211	0.00445622
GO:0005996	monosaccharide metabolic process	240	0.030429	0.0219665	0.0447975	0.0399695
GO:0006000	fructose metabolic process	14	0.018982	0.0369704	0.24319	-0.0713732
GO:0006004	fucose metabolic process	15	0.00668309	-0.0346584	-0.0994423	-0.193646
GO:0006006	glucose metabolic process	177	0.0319685	0.0256065	0.0781147	0.0507397
GO:0006007	glucose catabolic process	29	0.0338726	0.0330225	0.130863	0.0559178
GO:0006012	galactose metabolic process	14	0.0628244	0.0164244	0.00607439	-0.0458791
GO:0006020	inositol metabolic process	10	0.107581	0.0344071	0.079183	0.101021
GO:0006022	aminoglycan metabolic process	144	0.026874	0.0144334	0.0212735	-0.0453983
GO:0006023	aminoglycan biosynthetic process	96	0.0278959	0.00419913	0.0238523	-0.0681441
GO:0006024	glycosaminoglycan biosynthetic process	93	0.0277259	0.00651308	0.0189745	-0.0740963
GO:0006026	aminoglycan catabolic process	56	0.0242446	0.0204705	0.0338188	0.030593
GO:0006027	glycosaminoglycan catabolic process	52	0.026874	0.0167927	0.0400566	0.00781756
GO:0006029	proteoglycan metabolic process	78	0.034358	0.0130526	0.0232917	0.0152197
GO:0006040	amino sugar metabolic process	33	0.0732042	0.0454631	0.0914697	-0.000633218
GO:0006044	N-acetylglucosamine metabolic process	18	0.0764588	0.0249983	0.115252	-0.0263168
GO:0006047	UDP-N-acetylglucosamine metabolic process	13	0.0732042	0.0593582	0.0313163	0.17605
GO:0006048	UDP-N-acetylglucosamine biosynthetic process	10	0.0764588	0.0562282	0.0620949	0.0669194
GO:0006054	N-acetylneuraminate metabolic process	10	0.0687916	0.0520045	0.114555	0.0273773
GO:0006066	alcohol metabolic process	288	0.0290444	0.0231622	0.0481345	0.0240702
GO:0006067	ethanol metabolic process	14	0.100042	0.063563	0.062476	0.0556342
GO:0006071	glycerol metabolic process	19	0.0470196	0.00523993	0.135378	-0.0325555
GO:0006073	cellular glucan metabolic process	57	0.0644697	0.0160825	0.103017	0.00445622
GO:0006081	cellular aldehyde metabolic process	67	0.0128373	0.00629774	0.080598	-0.025635
GO:0006084	acetyl-CoA metabolic process	35	0.0419384	0.0302458	-0.0149656	-0.0347491
GO:0006085	acetyl-CoA biosynthetic process	20	0.0365398	-0.00550816	-0.00892687	-0.129199
GO:0006086	acetyl-CoA biosynthetic process from pyruvate	15	0.0376353	0.00602196	0.0319691	-0.11394
GO:0006089	lactate metabolic process	12	0.0392768	0.0291143	0.0702943	0.0246637
GO:0006090	pyruvate metabolic process	98	0.0407275	0.0236061	0.0603081	0.0156126
GO:0006091	generation of precursor metabolites and energy	390	0.033406	0.0277203	0.0514864	0.0172137
GO:0006094	gluconeogenesis	77	0.0319685	0.0213564	0.0568499	0.117429
GO:0006096	glycolytic process	63	0.0410014	0.0438953	0.107447	0.0469985
GO:0006098	pentose-phosphate shunt	15	0.0597662	0.0548247	-0.0980315	0.0912922
GO:0006099	tricarboxylic acid cycle	29	0.026075	0.023302	-0.104865	0.0237881
GO:0006101	citrate metabolic process	33	0.0282964	0.023302	-0.0736204	0.0237881
GO:0006103	2-oxoglutarate metabolic process	17	0.050586	0.0139177	0.0538312	-0.00219944
GO:0006105	succinate metabolic process	12	0.0466343	0.0310883	0.00238586	0.112343
GO:0006107	oxaloacetate metabolic process	11	0.0374124	0.0524144	0.229946	0.0372483
GO:0006109	regulation of carbohydrate metabolic process	139	0.0354442	0.0330225	0.0797517	0.0864064
GO:0006110	regulation of glycolytic process	36	0.041519	0.0485157	0.0560753	0.0582918
GO:0006111	regulation of gluconeogenesis	38	0.0295091	0.0201872	0.0397461	0.130883
GO:0006112	energy reserve metabolic process	69	0.0557768	0.0184172	0.093569	0.00350994
GO:0006119	oxidative phosphorylation	92	0.0164187	0.0117455	0.0637911	-0.0152676
GO:0006120	mitochondrial electron transport, NADH to ubiquinone	36	0.00507371	0.022469	0.0881907	0.00567506
GO:0006123	mitochondrial electron transport, cytochrome c to oxygen	11	0.0127239	0.000445791	-0.00795736	-0.0547915
GO:0006140	regulation of nucleotide metabolic process	84	0.0360524	0.0320441	0.0533438	0.0194369
GO:0006144	purine nucleobase metabolic process	17	0.063087	0.0312394	0.0780218	0.0189668
GO:0006163	purine nucleotide metabolic process	435	0.026075	0.0216398	0.0469003	0.0091233
GO:0006164	purine nucleotide biosynthetic process	222	0.0285816	0.0302949	0.0504463	0.0113417
GO:0006165	nucleoside diphosphate phosphorylation	78	0.050331	0.0444318	0.102764	0.0379108
GO:0006171	cAMP biosynthetic process	10	-0.00225918	0.0549286	0.0298246	-0.0527878
GO:0006182	cGMP biosynthetic process	10	0.0190708	0.0498606	-0.0145927	0.0818945
GO:0006188	IMP biosynthetic process	10	0.0238914	0.0053306	0.120341	-0.0347474
GO:0006195	purine nucleotide catabolic process	40	0.0331151	-0.0181301	0.0225027	-0.0676103
GO:0006206	pyrimidine nucleobase metabolic process	14	0.0746209	-0.00982251	0.0298679	-0.111544
GO:0006213	pyrimidine nucleoside metabolic process	45	0.0598304	0.0195204	0.0876153	0.0124679
GO:0006216	cytidine catabolic process	10	-0.00300153	0.0134134	0.0463551	-0.105321
GO:0006220	pyrimidine nucleotide metabolic process	56	0.071166	0.0293844	0.132453	0.046949
GO:0006221	pyrimidine nucleotide biosynthetic process	43	0.0709299	0.0274086	0.136902	0.036877
GO:0006222	UMP biosynthetic process	10	0.0371612	-0.0361147	-0.0340636	-0.0574648
GO:0006241	CTP biosynthetic process	12	0.0733817	0.0542977	0.12016	0.0278152
GO:0006244	pyrimidine nucleotide catabolic process	11	0.0763096	0.0648853	0.123824	0.0867346
GO:0006260	DNA replication	235	0.02099	0.0203477	-0.0176018	0.0536302
GO:0006261	DNA-dependent DNA replication	128	0.0217909	0.0247414	-0.0263086	0.0536292
GO:0006264	mitochondrial DNA replication	10	-0.0150209	0.0396338	-0.121736	0.0106313
GO:0006266	DNA ligation	16	0.0461809	0.0292352	0.106901	0.0256106
GO:0006270	DNA replication initiation	28	0.0461186	0.00969029	-0.132822	-0.024075
GO:0006271	DNA strand elongation involved in DNA replication	17	-0.0187912	-0.00729888	-0.0265901	0.0907663
GO:0006275	regulation of DNA replication	96	0.0247074	0.0326542	0.014784	0.0609956
GO:0006278	RNA-dependent DNA biosynthetic process	65	0.0255272	0.0333097	-0.0704995	0.0804992
GO:0006281	DNA repair	445	0.0241369	0.0170572	0.0134121	0.0504044
GO:0006282	regulation of DNA repair	100	0.0372443	0.024851	-0.00727582	0.0942488
GO:0006283	transcription-coupled nucleotide-excision repair	60	0.0373501	0.0136665	0.00939782	0.103403
GO:0006284	base-excision repair	37	0.00370989	0.0344959	0.057826	0.0867346
GO:0006289	nucleotide-excision repair	86	0.0355651	0.0104988	0.00939782	0.0810654
GO:0006293	nucleotide-excision repair, preincision complex stabilization	15	0.0518138	0.0133284	-0.0429804	0.0713323
GO:0006294	nucleotide-excision repair, preincision complex assembly	22	0.052728	0.0138611	0.00512393	0.0775295
GO:0006296	nucleotide-excision repair, DNA incision, 5'-to lesion	28	0.041944	0.0186496	-0.0134704	0.11367
GO:0006297	nucleotide-excision repair, DNA gap filling	19	0.0349077	0.0239707	-0.0696837	0.109662
GO:0006298	mismatch repair	29	0.0238045	0.01643	0.124458	-0.00442564
GO:0006301	postreplication repair	44	0.02827	0.0228203	-0.00301684	0.142172
GO:0006302	double-strand break repair	199	0.0232642	0.0170572	-0.0149361	0.038153
GO:0006303	double-strand break repair via nonhomologous end joining	73	0.0194448	0.0065093	-0.0618293	0.0252083
GO:0006304	DNA modification	89	0.0248699	0.00388745	0.026222	0.0360665
GO:0006305	DNA alkylation	55	0.0278204	0.0144844	-0.0358066	0.103857
GO:0006306	DNA methylation	55	0.0278204	0.0144844	-0.0358066	0.103857
GO:0006307	DNA dealkylation involved in DNA repair	10	0.042624	0.00277486	0.117348	-0.13399
GO:0006308	DNA catabolic process	36	-0.00209484	0.0233455	0.0382631	0.0619607
GO:0006309	apoptotic DNA fragmentation	22	-0.00600307	0.0163998	0.0222457	0.0946212
GO:0006310	DNA recombination	231	0.0232491	0.00795624	0.00699963	0.0281759
GO:0006312	mitotic recombination	21	0.0238045	0.0065093	-0.00724409	-0.0727583
GO:0006323	DNA packaging	166	0.0149	0.0202854	-0.0285012	0.000607152
GO:0006333	chromatin assembly or disassembly	152	0.0203043	0.028729	-0.0285012	-0.0100449
GO:0006334	nucleosome assembly	109	0.0177939	0.0186817	-0.0310142	-0.00831593
GO:0006335	DNA replication-dependent nucleosome assembly	25	0.0154629	0.0314963	0.00818467	0.0294935
GO:0006336	DNA replication-independent nucleosome assembly	44	0.0057405	0.0430604	-0.0174556	0.0090356
GO:0006337	nucleosome disassembly	17	0.0329885	0.0422859	0.0538557	-0.094298
GO:0006338	chromatin remodeling	140	0.0276806	0.0425636	0.0257701	0.0357425
GO:0006342	chromatin silencing	87	0.0299209	0.0218022	0.0250394	0.046775
GO:0006346	methylation-dependent chromatin silencing	16	0.0615041	0.041247	0.0412566	0.0803231
GO:0006349	regulation of gene expression by genetic imprinting	17	0.0506804	0.0144844	0.0770321	0.109706
GO:0006352	DNA-templated transcription, initiation	220	0.0229734	0.00350022	0.0148779	0.00161789
GO:0006353	DNA-templated transcription, termination	62	0.0416871	0.037641	0.0605391	0.134605
GO:0006354	DNA-templated transcription, elongation	84	0.020104	0.015954	-0.0453241	0.0541608
GO:0006356	regulation of transcription by RNA polymerase I	27	0.0342844	-0.00380056	0.0739631	-0.0406526
GO:0006359	regulation of transcription by RNA polymerase III	20	0.0347963	-0.00684365	-0.0112655	-0.0541336
GO:0006360	transcription by RNA polymerase I	53	0.0365435	0.0143938	0.0846615	0.0662087
GO:0006361	transcription initiation from RNA polymerase I promoter	31	0.0578811	0.0143938	0.11321	0.0662087
GO:0006363	termination of RNA polymerase I transcription	24	0.0632287	0.0227826	0.0831226	0.0748682
GO:0006364	rRNA processing	184	0.0384098	0.0122328	-0.00112003	-0.011699
GO:0006367	transcription initiation from RNA polymerase II promoter	167	0.0216435	0.00141293	0.00742722	-0.0161058
GO:0006368	transcription elongation from RNA polymerase II promoter	72	0.021041	0.0174217	-0.0398823	0.0776277
GO:0006369	termination of RNA polymerase II transcription	32	0.0270516	0.0417816	0.0813745	0.150393
GO:0006370	7-methylguanosine mRNA capping	28	0.0114489	0.0141935	0.0880031	0.14696
GO:0006376	mRNA splice site selection	34	0.0310599	0.0281717	0.0817652	0.102357
GO:0006378	mRNA polyadenylation	39	-0.015172	0.0161051	0.00801248	0.11886
GO:0006379	mRNA cleavage	21	-0.00562906	0.0386365	0.0607888	0.125439
GO:0006383	transcription by RNA polymerase III	49	0.0403592	0.0397056	0.0294937	0.0784041
GO:0006384	transcription initiation from RNA polymerase III promoter	11	0.0403592	0.0379829	0.00288848	0.0662087
GO:0006388	tRNA splicing, via endonucleolytic cleavage and ligation	10	-0.0197867	-0.037709	0.164799	-0.0870864
GO:0006390	mitochondrial transcription	12	0.011379	0.0163356	0.023473	0.066886
GO:0006397	mRNA processing	440	0.0256897	0.0156386	-0.00598253	0.0439544
GO:0006399	tRNA metabolic process	164	0.0110503	-0.00102003	-0.00836274	-0.0243704
GO:0006400	tRNA modification	76	0.0213073	0.00681343	-0.0072116	0.0106978
GO:0006401	RNA catabolic process	305	0.0200568	0.0137289	0.00168406	0.0126197
GO:0006402	mRNA catabolic process	275	0.0206726	0.0134568	0.00817822	0.0113483
GO:0006403	RNA localization	211	0.0271668	0.0159616	-0.0164888	0.0417338
GO:0006405	RNA export from nucleus	127	0.024987	0.0120137	0.00817822	0.031464
GO:0006406	mRNA export from nucleus	101	0.0206197	0.0120137	0.0205878	0.0681562
GO:0006413	translational initiation	170	0.0295563	0.00179072	-0.0129202	0.00404595
GO:0006414	translational elongation	122	0.0415681	0.0268079	0.0339827	0.00505318
GO:0006415	translational termination	93	0.0395847	0.0267966	0.10347	0.0139258
GO:0006417	regulation of translation	306	0.0256217	0.0104553	-0.00884477	0.0357602
GO:0006418	tRNA aminoacylation for protein translation	39	0.00675109	-0.0182812	-0.0607546	-0.0441813
GO:0006446	regulation of translational initiation	68	0.0241369	-0.00731966	-0.0278604	-0.0435594
GO:0006448	regulation of translational elongation	16	0.00383645	-0.0173197	-0.0727654	0.0553888
GO:0006450	regulation of translational fidelity	15	0.00388745	-0.0182812	-0.135199	-0.0211041
GO:0006457	protein folding	182	0.0300758	0.0230602	0.0127816	0.082588
GO:0006458	'de novo' protein folding	34	0.0226277	0.00431246	-0.105252	0.0393731
GO:0006465	signal peptide processing	11	0.0378167	0.0450287	-0.0215424	0.102008
GO:0006469	negative regulation of protein kinase activity	198	0.0300267	0.0291219	0.0466767	0.0541079
GO:0006470	protein dephosphorylation	278	0.0429999	0.0153666	0.0546152	0.0331191
GO:0006471	protein ADP-ribosylation	27	0.0195619	0.00192295	0.0481119	-0.00111493
GO:0006473	protein acetylation	178	0.0275163	0.0133605	0.00276284	0.0160267
GO:0006474	N-terminal protein amino acid acetylation	15	0.0318627	-0.0287535	0.122629	-0.149075
GO:0006475	internal protein amino acid acetylation	148	0.0229545	0.0149359	-0.0428038	0.0466235
GO:0006476	protein deacetylation	94	0.0295601	0.0334513	0.0106367	0.0621721
GO:0006479	protein methylation	156	0.0291936	0.00899893	0.0222128	0.0209441
GO:0006482	protein demethylation	29	0.0248585	-0.00993585	-0.100543	0.0714257
GO:0006486	protein glycosylation	209	0.0428337	0.00849648	0.0313163	0.0188231
GO:0006487	protein N-linked glycosylation	64	0.0569158	0.0153666	0.0868783	0.0743348
GO:0006488	dolichol-linked oligosaccharide biosynthetic process	18	0.0507427	0.00580284	0.00952201	-0.0462053
GO:0006490	oligosaccharide-lipid intermediate biosynthetic process	18	0.0507427	0.00580284	0.00952201	-0.0462053
GO:0006491	N-glycan processing	14	0.0439236	0.031228	0.132673	0.0645713
GO:0006493	protein O-linked glycosylation	85	0.0318476	0.00124293	0.035202	0.0188231
GO:0006497	protein lipidation	79	0.0231207	0.00192295	0.0253141	-0.00159358
GO:0006505	GPI anchor metabolic process	28	0.0237044	0.00529471	0.0934559	0.0181658
GO:0006506	GPI anchor biosynthetic process	27	0.0252401	0.00590106	0.0416206	0.0332967
GO:0006509	membrane protein ectodomain proteolysis	37	0.0351268	0.00410279	0.0621869	-0.0723774
GO:0006513	protein monoubiquitination	57	0.0448171	0.00598796	-0.00918896	0.0310153
GO:0006515	protein quality control for misfolded or incompletely synthesized proteins	23	0.0372424	0.0302873	0.00775759	0.106437
GO:0006516	glycoprotein catabolic process	15	0.0268117	0.00592373	-0.0501234	0.0451043
GO:0006517	protein deglycosylation	28	0.0308446	-0.00762567	-0.0234956	-0.0237791
GO:0006520	cellular amino acid metabolic process	280	0.0257331	0.0196828	0.00796281	0.0142302
GO:0006521	regulation of cellular amino acid metabolic process	15	0.00849648	0.012569	-0.00970021	0.00293084
GO:0006525	arginine metabolic process	15	0.0367513	0.0210542	-0.11336	0.000187552
GO:0006527	arginine catabolic process	10	0.0226239	0.0192559	-0.0991286	0.102599
GO:0006531	aspartate metabolic process	10	0.0519762	0.0581304	-0.0331882	-0.0817338
GO:0006534	cysteine metabolic process	15	0.011991	0.0394261	-0.194627	0.0599636
GO:0006536	glutamate metabolic process	35	0.036434	0.00753689	0.0629507	-0.0478404
GO:0006541	glutamine metabolic process	21	0.0377222	-0.0299473	0.0629507	-0.0438242
GO:0006544	glycine metabolic process	15	0.0474314	0.0394261	0.0641045	0.135482
GO:0006555	methionine metabolic process	12	0.0261392	0.0184361	-0.0923258	-0.0420762
GO:0006563	L-serine metabolic process	11	0.0393883	-0.0130262	0.0473065	-0.0438242
GO:0006568	tryptophan metabolic process	10	0.046572	0.0807127	-0.0436067	0.151707
GO:0006575	cellular modified amino acid metabolic process	163	0.0226711	0.024443	0.0437619	0.0219774
GO:0006576	cellular biogenic amine metabolic process	44	0.0413774	0.0362829	-0.0134917	0.0643712
GO:0006577	amino-acid betaine metabolic process	16	0.0363527	0.0348756	0.0210324	0.00266011
GO:0006582	melanin metabolic process	17	0.0429848	0.023268	0.0820505	0.00900408
GO:0006584	catecholamine metabolic process	42	0.0121176	0.0103949	0.00679139	-0.00739175
GO:0006586	indolalkylamine metabolic process	12	0.0430661	0.0807127	-0.0261163	0.151707
GO:0006590	thyroid hormone generation	13	0.0356142	0.00250852	-0.105938	-0.0628365
GO:0006595	polyamine metabolic process	15	0.0329243	-0.00636197	-0.0961067	-0.0536947
GO:0006596	polyamine biosynthetic process	12	0.0110692	-0.00257463	-0.0681607	0.00167535
GO:0006605	protein targeting	363	0.0292333	0.0180772	0.0255021	0.0165367
GO:0006606	protein import into nucleus	136	0.0250871	0.0222801	0.0156428	0.0308928
GO:0006607	NLS-bearing protein import into nucleus	21	0.0266643	0.0209786	0.0795024	-0.0748038
GO:0006611	protein export from nucleus	167	0.0198528	0.00337366	0.0115705	0.000576194
GO:0006612	protein targeting to membrane	167	0.0267626	0.0029052	-0.0323223	-0.0248111
GO:0006613	cotranslational protein targeting to membrane	91	0.0404877	0.00628641	0.029503	-0.0248111
GO:0006614	SRP-dependent cotranslational protein targeting to membrane	87	0.0404877	0.0029052	0.029503	-0.0324267
GO:0006616	SRP-dependent cotranslational protein targeting to membrane, translocation	11	0.018591	-0.0282888	-0.131282	-0.11272
GO:0006620	posttranslational protein targeting to endoplasmic reticulum membrane	10	-0.00641108	-0.0155215	-0.13805	-0.0925737
GO:0006622	protein targeting to lysosome	18	0.00513226	0.00504537	-0.0913028	-0.0123073
GO:0006623	protein targeting to vacuole	25	0.010869	-0.00821691	-0.0827123	-0.0496374
GO:0006625	protein targeting to peroxisome	59	0.0119684	0.0344581	0.133481	0.0903865
GO:0006626	protein targeting to mitochondrion	85	0.0429433	0.0122366	0.0525761	0.0600696
GO:0006631	fatty acid metabolic process	299	0.0308238	0.0184172	0.0657158	0.0246248
GO:0006633	fatty acid biosynthetic process	120	0.0375673	0.0327562	0.0434561	0.0535538
GO:0006635	fatty acid beta-oxidation	63	0.0484892	0.00890449	0.0900586	-0.00397096
GO:0006636	unsaturated fatty acid biosynthetic process	41	0.0410392	0.0471103	0.0687989	0.0803113
GO:0006637	acyl-CoA metabolic process	90	0.0324351	0.0314604	0.0274266	0.00593328
GO:0006638	neutral lipid metabolic process	100	0.0393505	0.0475901	0.0407763	0.094033
GO:0006639	acylglycerol metabolic process	99	0.0445867	0.0471103	0.0398324	0.08628
GO:0006641	triglyceride metabolic process	81	0.0336799	0.033763	0.0661712	0.0753701
GO:0006643	membrane lipid metabolic process	168	0.0287214	0.023166	0.0429873	0.0250032
GO:0006644	phospholipid metabolic process	404	0.0381624	0.0228203	0.0287974	0.0508088
GO:0006646	phosphatidylethanolamine biosynthetic process	12	-0.00921616	-0.0118191	-0.131808	-0.0497695
GO:0006650	glycerophospholipid metabolic process	317	0.0336988	0.0206764	0.0445042	0.0702916
GO:0006654	phosphatidic acid biosynthetic process	31	0.045856	0.0441938	0.132233	0.157381
GO:0006656	phosphatidylcholine biosynthetic process	29	0.00779002	-0.00120515	-0.0442148	-0.0114526
GO:0006658	phosphatidylserine metabolic process	24	0.0282926	0.0421121	0.123921	0.119614
GO:0006661	phosphatidylinositol biosynthetic process	133	0.0418288	0.0225767	0.045275	0.0535002
GO:0006662	glycerol ether metabolic process	11	-0.030106	0.0548739	-0.00618412	0.111309
GO:0006664	glycolipid metabolic process	87	0.0221687	0.00604462	-0.00195761	0.00265184
GO:0006665	sphingolipid metabolic process	127	0.0368874	0.0269099	0.0488081	0.0246248
GO:0006672	ceramide metabolic process	71	0.0290331	0.0216964	0.00570321	0.00183383
GO:0006677	glycosylceramide metabolic process	15	0.000748022	0.0028712	-0.149479	-0.0114386
GO:0006684	sphingomyelin metabolic process	14	0.0728528	0.0439671	0.00976033	-0.0399301
GO:0006687	glycosphingolipid metabolic process	50	0.0252703	0.0123896	-0.0149758	0.000276808
GO:0006688	glycosphingolipid biosynthetic process	20	0.0433702	0.0123896	0.0378588	-0.0169195
GO:0006690	icosanoid metabolic process	86	0.017571	0.0326788	0.0619636	0.0537119
GO:0006691	leukotriene metabolic process	20	0.0161939	0.0482852	0.0918118	0.187019
GO:0006692	prostanoid metabolic process	32	0.0284475	0.0318363	0.0552026	0.0545187
GO:0006693	prostaglandin metabolic process	32	0.0284475	0.0318363	0.0552026	0.0545187
GO:0006694	steroid biosynthetic process	154	0.0135815	-0.00337743	0.0545874	-0.00674975
GO:0006695	cholesterol biosynthetic process	60	0.0234418	-0.00286742	0.0295873	0.019044
GO:0006699	bile acid biosynthetic process	26	0.0306991	-0.00471292	0.0635722	-0.0704257
GO:0006700	C21-steroid hormone biosynthetic process	22	0.000283342	-0.000391012	0.0495697	-0.0476303
GO:0006702	androgen biosynthetic process	11	0.0337932	0.0207708	0.116027	0.0698219
GO:0006703	estrogen biosynthetic process	12	-0.0108482	-0.000190783	-0.00665988	0.010698
GO:0006704	glucocorticoid biosynthetic process	15	0.0489992	0.0329772	0.0769213	0.099196
GO:0006706	steroid catabolic process	20	0.0178354	0.0226976	0.0608269	0.00408693
GO:0006720	isoprenoid metabolic process	98	0.0299662	0.0105082	0.0300942	0.0426013
GO:0006721	terpenoid metabolic process	81	0.0298302	0.00779757	0.0349549	0.0421808
GO:0006730	one-carbon metabolic process	21	0.0583306	0.0111788	0.128154	-0.0240538
GO:0006732	coenzyme metabolic process	304	0.0301551	0.0263848	0.0338422	0.0091283
GO:0006733	oxidoreduction coenzyme metabolic process	138	0.0386384	0.0328488	0.0501312	0.0416825
GO:0006734	NADH metabolic process	34	0.0319062	0.0324634	0.0904226	0.0523329
GO:0006735	NADH regeneration	24	0.0344034	0.0291955	0.156263	0.0520251
GO:0006739	NADP metabolic process	30	0.0343675	0.0488897	0.0606529	-0.03475
GO:0006743	ubiquinone metabolic process	15	0.0443638	0.015342	-0.0118074	0.0260271
GO:0006744	ubiquinone biosynthetic process	14	0.0290142	0.0154119	0.00369251	0.0440621
GO:0006749	glutathione metabolic process	45	0.0428035	0.00488481	0.0608369	-0.00837628
GO:0006750	glutathione biosynthetic process	14	0.0584251	0.0283247	0.0522994	0.0709836
GO:0006754	ATP biosynthetic process	96	0.0344034	0.0213564	0.0533438	0.0352269
GO:0006757	ATP generation from ADP	64	0.041519	0.0384589	0.112687	0.0416825
GO:0006760	folic acid-containing compound metabolic process	24	0.00703065	-0.0109729	0.00219152	-0.0304409
GO:0006766	vitamin metabolic process	111	0.0146922	0.0111788	0.0392196	-0.0109306
GO:0006767	water-soluble vitamin metabolic process	75	0.0146922	0.0216511	0.0193191	0.0622081
GO:0006775	fat-soluble vitamin metabolic process	34	0.0148566	0.00680209	0.0867023	-0.0730695
GO:0006778	porphyrin-containing compound metabolic process	29	0.0202986	0.0373596	0.128916	0.0700193
GO:0006779	porphyrin-containing compound biosynthetic process	21	0.00520971	0.0467476	0.128916	0.0700193
GO:0006783	heme biosynthetic process	18	0.0119381	0.0710489	0.0365167	0.114788
GO:0006790	sulfur compound metabolic process	308	0.034851	0.018098	0.0314416	-0.00817902
GO:0006801	superoxide metabolic process	53	0.042471	0.0290369	0.0732237	0.0580478
GO:0006805	xenobiotic metabolic process	91	0.0260712	0.0207708	0.0372512	0.0173987
GO:0006809	nitric oxide biosynthetic process	57	0.00173027	0.0232189	0.0396947	-0.0160185
GO:0006813	potassium ion transport	204	0.0523408	0.0204573	0.0571972	0.0531235
GO:0006814	sodium ion transport	184	0.0357747	0.022673	0.0309646	0.0443048
GO:0006816	calcium ion transport	356	0.0230942	0.0128278	0.0207363	0.00756303
GO:0006817	phosphate ion transport	22	0.0582097	0.0452553	0.0187128	0.0861873
GO:0006821	chloride transport	91	0.0329621	0.0123008	0.0527674	-0.083806
GO:0006825	copper ion transport	16	0.0150341	0.037828	-0.0522031	0.0673976
GO:0006826	iron ion transport	55	0.0423275	0.0358597	0.170999	0.0730407
GO:0006828	manganese ion transport	11	0.029324	-0.00352477	0.170999	-0.0527502
GO:0006829	zinc ion transport	23	0.0414246	-0.00131848	0.0983019	0.0736616
GO:0006833	water transport	17	0.00573484	0.0526865	0.0913986	0.229499
GO:0006835	dicarboxylic acid transport	79	0.0513982	0.0317003	-0.0464873	0.0227092
GO:0006836	neurotransmitter transport	243	0.0481039	0.0216398	0.0662675	0.0119297
GO:0006837	serotonin transport	12	0.00101247	-0.0113261	0.14514	-0.0555307
GO:0006839	mitochondrial transport	210	0.0252552	0.013319	0.0419296	0.016368
GO:0006851	mitochondrial calcium ion transmembrane transport	18	-0.00590106	0.0186873	-0.0783666	-0.0662089
GO:0006855	drug transmembrane transport	81	0.0408579	-0.00979985	0.0191382	-0.0514866
GO:0006857	oligopeptide transport	10	0.058376	0.0415152	0.0838632	0.0135701
GO:0006862	nucleotide transport	21	0.0285571	0.0278468	0.0332138	0.0157171
GO:0006865	amino acid transport	118	0.0535686	0.0178146	0.0676075	0.0423733
GO:0006869	lipid transport	287	0.0251343	0.0256179	0.0180244	-0.0108678
GO:0006874	cellular calcium ion homeostasis	382	0.022843	0.0254686	0.0107292	0.0171502
GO:0006875	cellular metal ion homeostasis	483	0.0229658	0.0239669	0.0131223	0.00886983
GO:0006878	cellular copper ion homeostasis	12	-0.0169608	0.0242843	-0.150972	-0.0069009
GO:0006879	cellular iron ion homeostasis	56	0.0334551	0.0305537	0.0310987	-0.0196254
GO:0006882	cellular zinc ion homeostasis	28	0.0283077	0.00813002	0.130866	0.0612514
GO:0006883	cellular sodium ion homeostasis	14	0.0754501	0.0334816	0.0485332	0.042931
GO:0006884	cell volume homeostasis	26	0.0626998	0.00235551	-0.0171668	-0.00382086
GO:0006885	regulation of pH	72	0.034307	0.0153647	0.131719	0.0224113
GO:0006888	ER to Golgi vesicle-mediated transport	182	0.0254592	0.0197735	-0.00275929	-0.0175333
GO:0006890	retrograde vesicle-mediated transport, Golgi to ER	77	0.0369818	0.027401	0.063884	0.0588684
GO:0006891	intra-Golgi vesicle-mediated transport	28	0.0468515	0.0219571	-0.0226682	-0.101276
GO:0006892	post-Golgi vesicle-mediated transport	87	0.0573559	0.028984	0.0444059	0.0826165
GO:0006893	Golgi to plasma membrane transport	48	0.0728944	0.0286307	0.0457866	0.0213516
GO:0006895	Golgi to endosome transport	15	0.0632003	0.00811491	0.0710903	0.0767595
GO:0006896	Golgi to vacuole transport	12	0.0330414	-0.0204063	-0.102443	0.0612496
GO:0006898	receptor-mediated endocytosis	250	0.0368835	0.0233039	0.0129912	0.0108577
GO:0006900	vesicle budding from membrane	92	0.0354461	0.00954106	0.0531999	0.00599603
GO:0006901	vesicle coating	65	0.0381265	0.00961095	0.0586686	-0.00379456
GO:0006903	vesicle targeting	86	0.0378016	0.00903482	0.0570911	-0.0134992
GO:0006904	vesicle docking involved in exocytosis	42	0.0257841	0.0126862	-0.134596	0.0232043
GO:0006906	vesicle fusion	73	0.0313754	0.0235363	0.00939983	0.0109815
GO:0006907	pinocytosis	18	0.00706466	-0.0331	-0.000255771	-0.155735
GO:0006909	phagocytosis	216	0.0359258	0.0207803	-0.0118648	-0.0160978
GO:0006910	phagocytosis, recognition	15	-0.00467325	-0.00547039	-0.0930966	-0.145829
GO:0006911	phagocytosis, engulfment	36	0.0357766	0.0317966	-0.093721	-0.0276596
GO:0006913	nucleocytoplasmic transport	319	0.0242578	0.0144013	0.0115705	0.0118394
GO:0006914	autophagy	412	0.038032	0.0158048	0.0264983	0.0130176
GO:0006919	activation of cysteine-type endopeptidase activity involved in apoptotic process	73	0.0194637	0.0492032	0.00864094	0.109866
GO:0006921	cellular component disassembly involved in execution phase of apoptosis	31	0.0127995	0.0124293	-0.00788475	0.0461011
GO:0006925	inflammatory cell apoptotic process	20	0.0417022	0.0372387	-0.0364589	0.0772348
GO:0006929	substrate-dependent cell migration	28	0.0184814	-0.014628	-0.000468138	-0.0284046
GO:0006936	muscle contraction	290	0.0228185	0.0177164	0.0183533	0.00467294
GO:0006937	regulation of muscle contraction	136	0.0141274	0.0170194	-0.0192288	-0.0244192
GO:0006939	smooth muscle contraction	86	0.00351722	0.0211335	0.023557	0.00284453
GO:0006940	regulation of smooth muscle contraction	50	0.00237252	0.0231264	-0.02342	-0.0206893
GO:0006941	striated muscle contraction	143	0.0253648	0.0176541	0.0161913	0.0138047
GO:0006942	regulation of striated muscle contraction	81	0.0206802	0.0150247	0.00209422	0.0173987
GO:0006949	syncytium formation	45	0.0388972	0.0207973	0.0349658	0.0978932
GO:0006953	acute-phase response	36	0.0377203	0.0523653	-0.0214206	0.0335574
GO:0006956	complement activation	47	0.0374956	0.016464	0.0232803	0.00935224
GO:0006957	complement activation, alternative pathway	11	0.0238196	0.0223802	0.118098	-0.0367766
GO:0006958	complement activation, classical pathway	24	0.0399531	0.0179242	0.0845987	0.00426618
GO:0006959	humoral immune response	170	0.0013676	0.0139763	-0.0406725	-0.00545093
GO:0006968	cellular defense response	42	-0.00285797	0.0245808	0.0510698	0.0713897
GO:0006970	response to osmotic stress	65	0.0609185	0.00321498	0.0873229	-0.0264457
GO:0006972	hyperosmotic response	19	0.0417004	0.0237025	0.190663	-0.0170912
GO:0006977	DNA damage response, signal transduction by p53 class mediator resulting in cell cycle arrest	54	0.0131357	0.00691732	-0.0343759	0.00860414
GO:0006978	DNA damage response, signal transduction by p53 class mediator resulting in transcription of p21 class mediator	15	0.0241369	0.0192672	0.0160461	0.168552
GO:0006979	response to oxidative stress	375	0.0193428	0.01371	-0.00242868	0.0172833
GO:0006983	ER overload response	12	0.0663643	-0.00901216	0.0503254	0.0377255
GO:0006984	ER-nucleus signaling pathway	46	0.00489048	-0.00925772	-0.122645	0.00462454
GO:0006986	response to unfolded protein	152	0.0278355	0.0182529	-0.0807767	0.0462731
GO:0006991	response to sterol depletion	11	0.0527922	-0.0090896	0.0948831	-0.0462701
GO:0006997	nucleus organization	107	0.024647	0.013608	0.0115705	-0.0175256
GO:0006998	nuclear envelope organization	45	0.024647	0.0078089	0.0564804	0.0152571
GO:0006999	nuclear pore organization	12	-0.0222971	-0.0193107	0.0851879	-0.0706441
GO:0007004	telomere maintenance via telomerase	63	0.0239292	0.0333097	-0.0838422	0.0972445
GO:0007005	mitochondrion organization	443	0.024647	0.016226	0.0285551	0.0193432
GO:0007006	mitochondrial membrane organization	116	0.0164187	0.0106612	0.0258972	0.0048259
GO:0007007	inner mitochondrial membrane organization	38	0.00437291	0.000980363	-0.0174056	-0.117297
GO:0007009	plasma membrane organization	75	0.0193126	0.00759734	-0.0077503	-0.105077
GO:0007015	actin filament organization	343	0.0343977	0.0154365	0.0616325	-0.0135744
GO:0007016	cytoskeletal anchoring at plasma membrane	10	0.00370044	0.000891582	-0.042105	-0.00581975
GO:0007018	microtubule-based movement	243	0.0366493	0.0268608	0.0203312	0.0375038
GO:0007019	microtubule depolymerization	36	0.0566646	0.018506	0.126035	-0.0363939
GO:0007020	microtubule nucleation	25	0.0191841	0.0378431	-0.0872102	0.0726065
GO:0007026	negative regulation of microtubule depolymerization	22	0.0671444	0.0259031	0.162433	0.0889226
GO:0007029	endoplasmic reticulum organization	43	0.0381265	-0.000661131	0.0501613	0.00571138
GO:0007030	Golgi organization	119	0.0268532	0.0202382	-0.0116337	0.0248232
GO:0007031	peroxisome organization	71	0.0241445	0.0347226	0.10795	0.101415
GO:0007032	endosome organization	68	0.0275975	0.00852103	-0.0372844	-0.00249708
GO:0007033	vacuole organization	133	0.0383758	0.0153798	-0.0198901	-0.0184251
GO:0007034	vacuolar transport	109	0.0283342	0.00923316	-0.0290459	-0.00251333
GO:0007035	vacuolar acidification	19	0.0283342	0.00060824	0.12361	0.0470595
GO:0007039	protein catabolic process in the vacuole	14	0.0137326	-0.00956373	-0.161564	-0.00192545
GO:0007040	lysosome organization	47	0.0378167	0.00349833	-0.0198901	0.0332735
GO:0007041	lysosomal transport	85	0.0193995	0.00515682	-0.0422569	0.0292748
GO:0007043	cell-cell junction assembly	109	0.027299	0.00862492	0.0226307	0.0161062
GO:0007044	cell-substrate junction assembly	88	0.0372122	0.0163413	0.0771906	0.015254
GO:0007045	cell-substrate adherens junction assembly	73	0.0219155	0.0164225	-0.00030686	0.0181724
GO:0007050	cell cycle arrest	219	0.0175785	0.0104345	-0.0455071	0.021928
GO:0007051	spindle organization	139	0.0324445	0.0172801	0.0243571	0.0152924
GO:0007052	mitotic spindle organization	94	0.0359013	0.0242163	0.0670028	0.01048
GO:0007059	chromosome segregation	264	0.0187006	0.0237497	-0.00544419	0.00273287
GO:0007062	sister chromatid cohesion	47	0.0273444	0.0345488	0.0791524	-0.00442564
GO:0007063	regulation of sister chromatid cohesion	20	0.0271668	0.0494866	0.0787647	0.00501924
GO:0007064	mitotic sister chromatid cohesion	20	0.0311128	0.0434816	0.166866	0.0927908
GO:0007076	mitotic chromosome condensation	16	-0.0344676	0.0549437	0.000381757	0.175806
GO:0007077	mitotic nuclear envelope disassembly	12	0.0901197	-0.0189782	0.208609	-0.0772693
GO:0007080	mitotic metaphase plate congression	39	0.0193995	0.0101776	0.0278942	-0.0703909
GO:0007088	regulation of mitotic nuclear division	154	0.0436686	0.0205404	0.0459117	0.0029853
GO:0007091	metaphase/anaphase transition of mitotic cell cycle	49	0.0501175	-0.0079449	-0.0527742	-0.0823315
GO:0007093	mitotic cell cycle checkpoint	145	0.0268117	0.0065093	-0.0278732	-0.00526796
GO:0007094	mitotic spindle assembly checkpoint	30	0.0674108	-0.0135947	-0.0726372	-0.120313
GO:0007095	mitotic G2 DNA damage checkpoint	19	0.0619612	0.0313943	0.0288121	0.0856089
GO:0007096	regulation of exit from mitosis	17	0.0665816	0.0367324	0.213357	0.144227
GO:0007097	nuclear migration	17	0.0420139	0.000283342	0.0733454	-0.105576
GO:0007098	centrosome cycle	103	0.0162525	0.0138346	-0.0305867	0.0277282
GO:0007099	centriole replication	28	0.0377883	0.025225	5.15315e-05	-0.00301783
GO:0007100	mitotic centrosome separation	11	0.00832647	0.0263319	0.0621071	0.0395714
GO:0007127	meiosis I	82	0.00827925	0.000527016	-0.0345195	-0.00629341
GO:0007129	synapsis	30	-0.00490748	-0.0117001	-0.0591113	-0.0323634
GO:0007130	synaptonemal complex assembly	12	-0.0110862	0.0146809	-0.2084	0.0458294
GO:0007131	reciprocal meiotic recombination	38	0.0243013	-0.00017945	-0.0260418	-0.00843298
GO:0007140	male meiotic nuclear division	37	0.0150889	-0.00299964	-0.0750127	0.0504044
GO:0007141	male meiosis I	19	-0.0322896	-0.00804313	-0.129818	-0.0480123
GO:0007143	female meiotic nuclear division	20	-0.00378356	0.0163583	0.00166316	0.0683556
GO:0007156	homophilic cell adhesion via plasma membrane adhesion molecules	139	0.0321952	-0.00710243	0.0125224	-0.053273
GO:0007157	heterophilic cell-cell adhesion via plasma membrane cell adhesion molecules	36	0.042131	0.0529792	0.01577	0.0359227
GO:0007158	neuron cell-cell adhesion	15	0.061334	0.0338046	0.0190078	0.0468951
GO:0007159	leukocyte cell-cell adhesion	272	0.0189537	0.0282322	0.0340106	0.0103019
GO:0007160	cell-matrix adhesion	191	0.0293731	0.0133057	0.0147103	-0.018434
GO:0007162	negative regulation of cell adhesion	235	0.0171516	0.0133435	0.0147103	-0.0238673
GO:0007163	establishment or maintenance of cell polarity	183	0.0349946	0.0207973	0.0250861	-0.0156119
GO:0007164	establishment of tissue polarity	72	0.0423029	0.0376845	0.0918473	0.0633817
GO:0007168	receptor guanylyl cyclase signaling pathway	10	-0.0253138	0.00927472	-0.0501463	-0.0461616
GO:0007171	activation of transmembrane receptor protein tyrosine kinase activity	11	0.0327808	0.0192484	0.128077	0.0943615
GO:0007173	epidermal growth factor receptor signaling pathway	108	0.0319364	0.0290803	0.0181875	0.0357911
GO:0007175	negative regulation of epidermal growth factor-activated receptor activity	14	0.0210258	0.00791468	-0.134049	0.117507
GO:0007176	regulation of epidermal growth factor-activated receptor activity	23	0.0205442	0.00923316	-0.11823	-0.0182341
GO:0007178	transmembrane receptor protein serine/threonine kinase signaling pathway	278	0.0328242	0.0100983	0.0471441	0.0201332
GO:0007179	transforming growth factor beta receptor signaling pathway	164	0.0395356	0.00872504	0.0344947	0.00525346
GO:0007183	SMAD protein complex assembly	13	0.0132717	-0.00670198	0.117652	0.123545
GO:0007187	G protein-coupled receptor signaling pathway, coupled to cyclic nucleotide second messenger	199	0.0234683	0.0251834	-0.00114904	-0.00975481
GO:0007188	adenylate cyclase-modulating G protein-coupled receptor signaling pathway	172	0.0234154	0.0259371	-0.00172077	-0.00223693
GO:0007189	adenylate cyclase-activating G protein-coupled receptor signaling pathway	108	0.0210221	0.0251589	-0.00757295	-0.0406809
GO:0007190	activation of adenylate cyclase activity	24	0.0227693	0.0170383	0.0323356	0.0569387
GO:0007191	adenylate cyclase-activating dopamine receptor signaling pathway	10	0.0566022	0.0870029	0.155687	0.323005
GO:0007193	adenylate cyclase-inhibiting G protein-coupled receptor signaling pathway	67	0.0367135	0.0193579	0.00874796	-0.0153634
GO:0007194	negative regulation of adenylate cyclase activity	15	0.0442089	0.00813002	0.177447	-0.0058367
GO:0007200	phospholipase C-activating G protein-coupled receptor signaling pathway	77	0.0155385	0.0325276	-0.0918188	0.0208225
GO:0007202	activation of phospholipase C activity	24	0.0439954	0.0287271	0.0459167	0.0217352
GO:0007204	positive regulation of cytosolic calcium ion concentration	261	0.0227202	0.0245865	-0.00560173	0.0173987
GO:0007205	protein kinase C-activating G protein-coupled receptor signaling pathway	24	0.0354102	0.0338329	0.0588918	0.0774371
GO:0007210	serotonin receptor signaling pathway	27	0.0179601	0.0284173	-0.00637279	-0.0634519
GO:0007212	dopamine receptor signaling pathway	39	0.0741789	0.0473861	0.14292	0.204281
GO:0007213	G protein-coupled acetylcholine receptor signaling pathway	15	0.0522936	0.0510166	0.0421422	0.178134
GO:0007214	gamma-aminobutyric acid signaling pathway	22	0.045363	0.0178826	-0.0785838	-0.0836748
GO:0007215	glutamate receptor signaling pathway	84	0.050977	0.0311997	0.0745364	0.0468988
GO:0007216	G protein-coupled glutamate receptor signaling pathway	14	0.0572237	0.0338933	0.0582049	-0.0847448
GO:0007218	neuropeptide signaling pathway	82	0.00115037	0.00702121	-0.00409156	-0.0511267
GO:0007219	Notch signaling pathway	164	0.0346584	0.0160749	0.0365098	0.0518378
GO:0007221	positive regulation of transcription of Notch receptor target	17	-0.00626374	-0.0195884	-0.03132	0.041084
GO:0007223	Wnt signaling pathway, calcium modulating pathway	33	0.0704161	0.0392598	0.103019	0.0801513
GO:0007224	smoothened signaling pathway	117	0.0240274	0.00993207	0.0773651	0.0378909
GO:0007229	integrin-mediated signaling pathway	88	0.0332889	0.01337	0.0128619	0.0359692
GO:0007249	I-kappaB kinase/NF-kappaB signaling	221	0.0274161	0.0232794	0.0296182	0.0189856
GO:0007250	activation of NF-kappaB-inducing kinase activity	13	0.0261619	0.0337592	0.00824651	-0.0974673
GO:0007252	I-kappaB phosphorylation	15	0.0175936	0.034239	0.0482601	-0.0603156
GO:0007254	JNK cascade	186	0.0367079	0.0344052	0.0359664	0.032833
GO:0007256	activation of JNKK activity	10	0.0471802	-0.0106801	-0.0999183	0.129826
GO:0007257	activation of JUN kinase activity	36	0.0267361	0.0239216	-0.0582876	-0.035531
GO:0007259	JAK-STAT cascade	112	0.0141765	0.023115	0.0152611	0.03266
GO:0007260	tyrosine phosphorylation of STAT protein	65	0.0144542	0.0332341	-0.00250108	0.0606658
GO:0007263	nitric oxide mediated signal transduction	22	0.0292446	0.00788257	-0.0861654	-0.000315759
GO:0007264	small GTPase mediated signal transduction	471	0.0415719	0.0158596	0.0431178	-0.00526796
GO:0007265	Ras protein signal transduction	373	0.0414019	0.0109445	0.0431178	-0.00354168
GO:0007266	Rho protein signal transduction	168	0.0371348	0.00570839	0.061618	-0.0434032
GO:0007269	neurotransmitter secretion	152	0.0505104	0.0317834	0.0841486	0.0267951
GO:0007271	synaptic transmission, cholinergic	23	0.014628	0.0347264	0.0502912	0.145664
GO:0007272	ensheathment of neurons	100	0.0417948	0.00700232	0.0829333	0.032031
GO:0007274	neuromuscular synaptic transmission	24	0.0690504	0.0688388	0.0320501	0.0779519
GO:0007281	germ cell development	185	0.0185797	0.0199473	-0.0140279	0.0296908
GO:0007283	spermatogenesis	405	0.019033	0.0174576	0.0115431	0.0120467
GO:0007286	spermatid development	106	0.0128977	0.0164244	-0.0353173	-0.0299071
GO:0007288	sperm axoneme assembly	10	0.00119004	-0.0338858	-0.0913876	-0.141659
GO:0007289	spermatid nucleus differentiation	16	0.0109502	0.0231925	-0.0309072	0.0136871
GO:0007292	female gamete generation	103	0.0174841	0.0242276	0.00161882	0.0742106
GO:0007338	single fertilization	105	0.0248056	0.0199473	0.0302928	0.0400369
GO:0007339	binding of sperm to zona pellucida	27	0.053884	0.0134568	-0.0727532	0.0972445
GO:0007340	acrosome reaction	25	0.00395923	0.0199473	-0.0727532	-0.00826655
GO:0007342	fusion of sperm to egg plasma membrane involved in single fertilization	11	0.0249492	0.0360562	0.164993	-0.113436
GO:0007368	determination of left/right symmetry	99	0.0279828	0.0084587	0.00508784	0.00795661
GO:0007369	gastrulation	153	0.0260599	0.0170987	-0.0131165	0.0310153
GO:0007379	segment specification	15	0.025667	0.0884366	0.161836	0.194184
GO:0007389	pattern specification process	368	0.0299341	0.00890449	0.0209779	0.0245949
GO:0007398	ectoderm development	19	0.0455727	0.0142804	0.0948831	0.0321586
GO:0007405	neuroblast proliferation	52	0.0329413	0.00977718	-0.139983	-0.0237061
GO:0007409	axonogenesis	425	0.0353875	0.00884782	-0.00439802	-0.0165381
GO:0007411	axon guidance	244	0.0316115	0.00584251	-0.0184375	-0.0369527
GO:0007413	axonal fasciculation	23	-0.000177561	0.00504348	-0.0636157	-0.0360421
GO:0007416	synapse assembly	146	0.0422973	0.00976962	0.0371924	-0.0194776
GO:0007422	peripheral nervous system development	64	0.043442	-0.0192578	0.0913998	0.0501427
GO:0007423	sensory organ development	471	0.0300796	0.0056555	2.87541e-05	-0.0106429
GO:0007431	salivary gland development	34	0.0428148	-0.0127957	0.166727	0.0560986
GO:0007435	salivary gland morphogenesis	32	0.0563	-0.0127957	0.177438	0.0974189
GO:0007492	endoderm development	67	0.0238952	0.0228525	0.0258294	0.0379299
GO:0007494	midgut development	10	0.0453895	0.0320856	-0.0492102	0.0995905
GO:0007498	mesoderm development	108	0.0227901	-0.000187006	0.000775951	-0.0133152
GO:0007501	mesodermal cell fate specification	13	-0.00495659	0.0170987	-0.145698	-0.159638
GO:0007507	heart development	478	0.0269005	0.00328299	0.0246011	-0.00698695
GO:0007512	adult heart development	10	0.0113035	0.00405368	0.136586	-0.117049
GO:0007517	muscle organ development	340	0.034256	0.00292786	0.0345128	-0.0244102
GO:0007519	skeletal muscle tissue development	146	0.0293731	0.00265208	0.0265502	0.00738343
GO:0007520	myoblast fusion	35	0.0470196	0.0104988	-0.00542902	0.0754281
GO:0007528	neuromuscular junction development	43	0.0418855	0.0109899	0.0135618	-0.0404703
GO:0007530	sex determination	19	0.0283002	-0.0152173	-0.0393135	0.0383782
GO:0007548	sex differentiation	223	0.0291993	0.00740844	0.030562	-0.00575779
GO:0007549	dosage compensation	19	0.0177939	0.0360033	0.0408579	0.0691407
GO:0007565	female pregnancy	170	0.0184399	0.0195185	-0.0109563	-0.0031953
GO:0007566	embryo implantation	47	0.00788068	0.0178694	-0.0196959	-0.112209
GO:0007567	parturition	15	0.0214017	0.031432	-0.0286287	-0.0490966
GO:0007568	aging	265	0.0280622	0.0239632	0.010035	0.0395714
GO:0007569	cell aging	93	0.0145487	0.0263168	-0.0258064	0.0507397
GO:0007584	response to nutrient	190	0.0243069	0.0190897	-0.0058718	-0.00338576
GO:0007585	respiratory gaseous exchange	56	0.017775	0.029171	0.0458	0.0505374
GO:0007586	digestion	106	0.0175653	0.0221214	0.0480446	0.0220791
GO:0007588	excretion	56	0.021381	0.0280376	0.0718641	0.136682
GO:0007589	body fluid secretion	80	0.046043	0.0278072	0.0759843	0.0254035
GO:0007595	lactation	39	0.0374124	0.024443	-0.00306754	-0.0314388
GO:0007596	blood coagulation	279	0.0349833	0.0325276	-0.0190113	0.046775
GO:0007597	blood coagulation, intrinsic pathway	11	0.0216738	0.0095694	-0.0765535	0.117786
GO:0007599	hemostasis	284	0.0344411	0.0310901	-0.0192849	0.0428084
GO:0007601	visual perception	164	0.0223934	0.0206934	0.022382	0.0256378
GO:0007602	phototransduction	43	0.0366078	0.0434722	0.0373156	0.104771
GO:0007603	phototransduction, visible light	25	0.0234683	0.0434722	0.00749693	0.104771
GO:0007605	sensory perception of sound	125	0.0351268	-0.00506237	-0.0123709	-0.0659999
GO:0007606	sensory perception of chemical stimulus	284	0.0173726	0.0173481	0.00765341	0.026824
GO:0007608	sensory perception of smell	231	0.0159843	0.0182397	-0.0183789	-0.00743951
GO:0007611	learning or memory	220	0.042488	0.023336	0.0127841	0.058385
GO:0007612	learning	129	0.0423464	0.0105894	-0.0109862	0.035116
GO:0007613	memory	106	0.030174	0.0256254	-0.00234312	0.0529661
GO:0007616	long-term memory	31	0.0354328	0.0161051	0.0732008	0.124791
GO:0007617	mating behavior	19	0.0212431	0.0380698	-0.0115077	0.143388
GO:0007618	mating	33	0.0450249	0.0473861	-0.00168221	0.166768
GO:0007620	copulation	17	0.0568648	0.0889466	0.0844409	0.213207
GO:0007622	rhythmic behavior	38	0.0119287	0.0210088	0.0133874	-0.0570122
GO:0007623	circadian rhythm	174	0.0390143	0.0281585	0.00112557	0.0473145
GO:0007625	grooming behavior	15	0.0646284	0.0722257	0.115291	0.0523442
GO:0007626	locomotory behavior	167	0.0293391	0.0132944	0.0245748	-0.00575779
GO:0007628	adult walking behavior	25	0.0505671	0.0206197	0.0229817	-0.018859
GO:0007631	feeding behavior	85	0.0155385	0.00354366	-0.0173564	-0.048947
GO:0007632	visual behavior	45	0.0532343	0.0235249	-0.00499922	0.0150929
GO:0007635	chemosensory behavior	13	0.016022	-0.025157	0.197697	0.0550964
GO:0007638	mechanosensory behavior	12	0.0315737	-0.0413868	-0.00397192	-0.122904
GO:0008015	blood circulation	417	0.0277373	0.0144844	0.0425948	-0.00877821
GO:0008016	regulation of heart contraction	183	0.0361393	0.0174576	0.0607441	0.0047387
GO:0008033	tRNA processing	112	0.0189952	0.000321121	-0.0233327	-0.0169109
GO:0008037	cell recognition	121	0.0229582	0.00889693	-0.00815186	0.0143066
GO:0008038	neuron recognition	43	0.0165774	-0.0082698	0.00159959	0.0126424
GO:0008045	motor neuron axon guidance	21	0.0376165	-0.0153533	0.0659628	-0.0507487
GO:0008053	mitochondrial fusion	19	-0.00347566	0.00867026	-0.0260208	0.0193432
GO:0008064	regulation of actin polymerization or depolymerization	151	0.0359277	0.01626	0.0437636	-0.0129694
GO:0008088	axo-dendritic transport	60	0.0497397	0.0254951	0.0268271	-0.0147821
GO:0008089	anterograde axonal transport	41	0.0481945	0.00925205	0.030005	-0.0113384
GO:0008090	retrograde axonal transport	15	0.0283342	0.0263319	0.030005	0.0600696
GO:0008154	actin polymerization or depolymerization	178	0.0360279	0.0158596	0.0484993	-0.0159654
GO:0008156	negative regulation of DNA replication	33	0.0263092	0.033899	-0.0373477	0.0536283
GO:0008202	steroid metabolic process	245	0.0233927	0.0070231	0.0543731	0.0217362
GO:0008203	cholesterol metabolic process	118	0.0290444	0.0111467	0.0305665	0.019044
GO:0008206	bile acid metabolic process	33	0.0118739	0.00348699	0.0705999	-0.0903035
GO:0008207	C21-steroid hormone metabolic process	34	0.00300531	-3.02231e-05	0.0591623	-0.00982919
GO:0008209	androgen metabolic process	25	0.00981118	0.00621841	0.0465777	-0.00467637
GO:0008210	estrogen metabolic process	20	0.0225238	-0.000190783	0.160287	0.0323818
GO:0008211	glucocorticoid metabolic process	21	0.0717384	0.0246243	0.0769213	0.099196
GO:0008213	protein alkylation	156	0.0291936	0.00899893	0.0222128	0.0209441
GO:0008214	protein dealkylation	29	0.0248585	-0.00993585	-0.100543	0.0714257
GO:0008217	regulation of blood pressure	152	0.022418	0.00816402	0.0150691	-0.021268
GO:0008272	sulfate transport	14	0.0192975	0.0260599	-0.056788	0.043116
GO:0008277	regulation of G protein-coupled receptor signaling pathway	122	0.0389406	0.00581228	0.0280521	-0.0142823
GO:0008286	insulin receptor signaling pathway	116	0.0291105	0.0306538	0.078689	0.0341576
GO:0008298	intracellular mRNA localization	11	0.0114583	0.015648	-0.0744304	0.0669946
GO:0008299	isoprenoid biosynthetic process	28	0.0276258	0.00523427	0.030166	0.0694769
GO:0008306	associative learning	68	0.0572842	0.0253723	-0.0109818	0.0467676
GO:0008333	endosome to lysosome transport	46	0.0104666	0.00898193	-0.0345776	-0.0228552
GO:0008334	histone mRNA metabolic process	24	-0.0134606	0.0397963	0.0678286	0.134605
GO:0008340	determination of adult lifespan	10	0.0389935	0.0376882	0.125073	0.0754324
GO:0008344	adult locomotory behavior	67	0.0440426	0.0157085	0.0539212	0.0651619
GO:0008347	glial cell migration	40	0.037199	0.0361695	-0.0426856	-0.0483351
GO:0008356	asymmetric cell division	18	0.0718668	0.0575902	0.144637	0.0346623
GO:0008360	regulation of cell shape	135	0.0326788	0.00813002	0.0246951	0.0123279
GO:0008361	regulation of cell size	162	0.0295412	0.0139234	-0.000266036	0.0042384
GO:0008366	axon ensheathment	100	0.0417948	0.00700232	0.0829333	0.032031
GO:0008380	RNA splicing	385	0.0281264	0.0122593	0.00291869	0.0345059
GO:0008406	gonad development	180	0.0273991	0.0108067	0.0299181	-0.00245656
GO:0008535	respiratory chain complex IV assembly	16	0.0142861	0.0301079	0.0720778	0.0943782
GO:0008542	visual learning	40	0.0633344	0.0245431	-0.00469862	0.0025999
GO:0008543	fibroblast growth factor receptor signaling pathway	93	0.0293731	0.0183492	0.045275	0.0361567
GO:0008544	epidermis development	330	0.0241067	0.0149019	0.0356031	0.0151468
GO:0008584	male gonad development	114	0.0224237	0.0109275	0.0249313	-0.00245656
GO:0008585	female gonad development	85	0.0283002	0.0168267	0.030562	0.00350994
GO:0008589	regulation of smoothened signaling pathway	69	0.018319	0.00993207	0.0624311	-0.0243475
GO:0008593	regulation of Notch signaling pathway	82	0.0338046	0.00231774	0.0365098	0.0473562
GO:0008608	attachment of spindle microtubules to kinetochore	27	0.0662037	0.0137137	-0.0190683	-0.033332
GO:0008625	extrinsic apoptotic signaling pathway via death domain receptors	68	0.0205517	0.023523	0.0175577	0.00117823
GO:0008630	intrinsic apoptotic signaling pathway in response to DNA damage	97	0.0241369	0.0182057	-0.0260208	-0.0436141
GO:0008631	intrinsic apoptotic signaling pathway in response to oxidative stress	39	0.03691	0.0231131	0.00417311	-0.0462701
GO:0008637	apoptotic mitochondrial changes	103	0.0194637	0.0215378	0.0244085	0.0193432
GO:0008643	carbohydrate transport	116	0.0277675	0.0192521	0.0036866	0.0151918
GO:0008645	hexose transmembrane transport	91	0.033899	0.0180243	0.00852224	-0.00266257
GO:0008652	cellular amino acid biosynthetic process	72	0.0393392	0.0213847	-0.0539702	-0.0327751
GO:0008654	phospholipid biosynthetic process	250	0.0368118	0.0137345	0.0260579	0.0457538
GO:0008655	pyrimidine-containing compound salvage	12	0.0416361	0.0450343	0.120476	0.0498931
GO:0009048	dosage compensation by inactivation of X chromosome	17	0.0433966	0.0360033	0.0408579	0.0691407
GO:0009060	aerobic respiration	63	0.0271819	0.00709488	0.000365468	-0.0190691
GO:0009062	fatty acid catabolic process	89	0.0397623	0.00890449	0.0844409	-0.0276022
GO:0009063	cellular amino acid catabolic process	103	0.0381945	0.0217153	0.0687869	0.0189668
GO:0009064	glutamine family amino acid metabolic process	65	0.0381945	0.0210542	0.0538312	0.0189668
GO:0009065	glutamine family amino acid catabolic process	24	0.0277524	0.0183322	0.0583909	-0.0263611
GO:0009066	aspartate family amino acid metabolic process	42	0.0468534	0.0289424	-0.00544101	-0.0317357
GO:0009067	aspartate family amino acid biosynthetic process	19	0.011991	0.049037	-0.0212888	-0.0463645
GO:0009068	aspartate family amino acid catabolic process	17	0.0658864	0.0316021	0.117607	0.0528111
GO:0009069	serine family amino acid metabolic process	40	0.0220421	0.0369421	0.0557055	0.0766476
GO:0009070	serine family amino acid biosynthetic process	17	0.0242352	0.0189235	-0.0535327	0.0599636
GO:0009071	serine family amino acid catabolic process	12	0.0404385	0.0369421	0.0557055	-0.010053
GO:0009072	aromatic amino acid family metabolic process	32	0.0168173	0.030174	5.81098e-05	-0.00524647
GO:0009074	aromatic amino acid family catabolic process	22	0.0419346	0.0369289	0.054949	0.0851226
GO:0009081	branched-chain amino acid metabolic process	21	0.040805	0.0313414	0.0802043	0.0407009
GO:0009083	branched-chain amino acid catabolic process	18	0.0274596	0.0322216	0.0748906	0.130123
GO:0009084	glutamine family amino acid biosynthetic process	15	0.0392901	0.0210542	-0.131815	-0.0478404
GO:0009100	glycoprotein metabolic process	337	0.0324899	0.0144693	0.0233782	0.0121714
GO:0009101	glycoprotein biosynthetic process	280	0.032318	0.0140141	0.0249127	0.00415676
GO:0009108	coenzyme biosynthetic process	187	0.0314396	0.0281755	0.0551045	0.0260271
GO:0009109	coenzyme catabolic process	12	0.0130281	-0.0341937	0.130162	-0.201838
GO:0009110	vitamin biosynthetic process	20	0.00917461	0.0126295	0.029206	-0.100541
GO:0009111	vitamin catabolic process	10	0.00452402	-0.0194788	0.164207	-0.156501
GO:0009112	nucleobase metabolic process	30	0.063597	0.0251532	0.0722549	-0.0308644
GO:0009116	nucleoside metabolic process	108	0.0500665	0.0204119	0.0559682	0.0143216
GO:0009119	ribonucleoside metabolic process	85	0.0311034	0.0117455	0.0384374	0.00548397
GO:0009123	nucleoside monophosphate metabolic process	265	0.0311034	0.0208917	0.0780218	0.00350994
GO:0009124	nucleoside monophosphate biosynthetic process	144	0.0306897	0.0259239	0.0570478	0.0196048
GO:0009125	nucleoside monophosphate catabolic process	10	0.0974828	0.0372387	0.222278	0.000304852
GO:0009126	purine nucleoside monophosphate metabolic process	234	0.0297811	0.0206348	0.0748178	0.00291435
GO:0009127	purine nucleoside monophosphate biosynthetic process	120	0.0306897	0.027452	0.0570478	0.0196048
GO:0009129	pyrimidine nucleoside monophosphate metabolic process	17	0.064107	-0.0245374	-0.0333956	-0.0378023
GO:0009130	pyrimidine nucleoside monophosphate biosynthetic process	16	0.0593507	-0.0295091	-0.0340636	-0.0732962
GO:0009132	nucleoside diphosphate metabolic process	102	0.0499286	0.0324634	0.0948626	0.0192535
GO:0009135	purine nucleoside diphosphate metabolic process	85	0.0384136	0.0319043	0.10211	0.0202427
GO:0009141	nucleoside triphosphate metabolic process	250	0.0344034	0.0206688	0.0689444	0.0161693
GO:0009142	nucleoside triphosphate biosynthetic process	122	0.0403025	0.0269477	0.0570478	0.0248204
GO:0009144	purine nucleoside triphosphate metabolic process	232	0.0286799	0.0212979	0.0689444	0.0188038
GO:0009145	purine nucleoside triphosphate biosynthetic process	106	0.0375315	0.0297414	0.0533438	0.0358652
GO:0009147	pyrimidine nucleoside triphosphate metabolic process	20	0.0733817	0.0200908	0.12016	0.0278152
GO:0009148	pyrimidine nucleoside triphosphate biosynthetic process	17	0.0744622	0.0274086	0.103418	0.0161754
GO:0009150	purine ribonucleotide metabolic process	408	0.0274955	0.0248869	0.0514864	0.0120295
GO:0009151	purine deoxyribonucleotide metabolic process	11	-0.00231962	0.0203779	0.141425	0.108424
GO:0009152	purine ribonucleotide biosynthetic process	207	0.029426	0.030344	0.0506014	0.00972251
GO:0009154	purine ribonucleotide catabolic process	28	0.00461847	-0.0221403	0.0640999	-0.010311
GO:0009156	ribonucleoside monophosphate biosynthetic process	133	0.0314396	0.0203779	0.0543163	0.0182643
GO:0009157	deoxyribonucleoside monophosphate biosynthetic process	10	0.0498039	0.0416286	0.124125	0.0924481
GO:0009161	ribonucleoside monophosphate metabolic process	246	0.0305216	0.0178732	0.0748178	0.00291435
GO:0009162	deoxyribonucleoside monophosphate metabolic process	13	0.0709299	0.043204	0.1442	0.0514248
GO:0009163	nucleoside biosynthetic process	38	0.0513944	0.0263848	0.0566942	0.0508316
GO:0009164	nucleoside catabolic process	29	0.0597662	0.0353837	0.109641	0.0220529
GO:0009165	nucleotide biosynthetic process	295	0.030242	0.0281755	0.0543163	0.0157171
GO:0009166	nucleotide catabolic process	120	0.0405141	0.0203704	0.0792435	0.0229696
GO:0009167	purine ribonucleoside monophosphate metabolic process	233	0.0299398	0.0208917	0.0780218	0.00350994
GO:0009168	purine ribonucleoside monophosphate biosynthetic process	120	0.0306897	0.027452	0.0570478	0.0196048
GO:0009173	pyrimidine ribonucleoside monophosphate metabolic process	10	0.0371612	-0.0361147	-0.0340636	-0.0574648
GO:0009174	pyrimidine ribonucleoside monophosphate biosynthetic process	10	0.0371612	-0.0361147	-0.0340636	-0.0574648
GO:0009179	purine ribonucleoside diphosphate metabolic process	85	0.0384136	0.0319043	0.10211	0.0202427
GO:0009185	ribonucleoside diphosphate metabolic process	87	0.0404536	0.0319043	0.10211	0.0182643
GO:0009187	cyclic nucleotide metabolic process	38	-0.0192295	0.0243202	-0.0262789	0.0183991
GO:0009190	cyclic nucleotide biosynthetic process	21	-0.00106914	0.0453347	0.00749693	-0.00710655
GO:0009199	ribonucleoside triphosphate metabolic process	231	0.0338726	0.0208917	0.0716139	0.0129609
GO:0009200	deoxyribonucleoside triphosphate metabolic process	16	0.0365511	0.0188649	0.0823685	0.0801943
GO:0009201	ribonucleoside triphosphate biosynthetic process	111	0.0404536	0.0264868	0.0543163	0.0293981
GO:0009205	purine ribonucleoside triphosphate metabolic process	225	0.0314396	0.0213791	0.0716139	0.0161631
GO:0009206	purine ribonucleoside triphosphate biosynthetic process	105	0.0384023	0.0284173	0.0543163	0.0353638
GO:0009208	pyrimidine ribonucleoside triphosphate metabolic process	14	0.0697757	0.00428979	0.0955169	0.0278152
GO:0009209	pyrimidine ribonucleoside triphosphate biosynthetic process	13	0.0723013	0.0274086	0.103418	0.0161754
GO:0009214	cyclic nucleotide catabolic process	14	-0.0257482	-0.0221403	-0.0372523	0.0966179
GO:0009218	pyrimidine ribonucleotide metabolic process	22	0.0596453	0.000345677	0.0955169	0.0108297
GO:0009219	pyrimidine deoxyribonucleotide metabolic process	18	0.0736197	0.030208	0.0135627	0.0244661
GO:0009220	pyrimidine ribonucleotide biosynthetic process	20	0.0596453	-0.00250852	0.0955169	0.0108297
GO:0009223	pyrimidine deoxyribonucleotide catabolic process	10	0.0644281	0.042624	0.0916543	0.103653
GO:0009225	nucleotide-sugar metabolic process	32	0.0429981	0.0297547	0.0306281	0.0669194
GO:0009226	nucleotide-sugar biosynthetic process	20	0.0429981	0.0431737	0.0188142	0.0971038
GO:0009235	cobalamin metabolic process	21	-0.0199208	0.00796757	0.0193191	-0.0287224
GO:0009247	glycolipid biosynthetic process	54	0.0271366	0.00850781	-0.0204672	0.0028434
GO:0009250	glucan biosynthetic process	39	0.0557768	0.0262677	0.119087	0.0429947
GO:0009251	glucan catabolic process	13	0.0644697	0.015376	0.10211	0.00445622
GO:0009259	ribonucleotide metabolic process	423	0.0277373	0.0216398	0.0506014	0.0085341
GO:0009260	ribonucleotide biosynthetic process	220	0.0295242	0.027792	0.0485957	0.00700903
GO:0009261	ribonucleotide catabolic process	29	0.0278166	-0.0213149	0.106507	-0.0339773
GO:0009262	deoxyribonucleotide metabolic process	32	0.0354744	0.0302156	0.0413985	0.0693495
GO:0009263	deoxyribonucleotide biosynthetic process	14	0.0318231	0.0413112	-0.0412252	-0.0210052
GO:0009264	deoxyribonucleotide catabolic process	17	0.0503933	0.0451307	0.123824	0.142243
GO:0009265	2'-deoxyribonucleotide biosynthetic process	12	0.0684478	0.0413112	-0.0341124	-0.0210052
GO:0009266	response to temperature stimulus	174	0.0266927	0.0128259	0.0192237	0.0126851
GO:0009267	cellular response to starvation	131	0.029596	0.0182057	-0.00648049	0.00343203
GO:0009268	response to pH	38	0.0243674	0.0352723	0.0909125	0.0311565
GO:0009299	mRNA transcription	23	0.00691732	0.00130715	-0.0785001	-0.0164482
GO:0009301	snRNA transcription	68	0.01058	0.0121856	0.00891086	0.059337
GO:0009303	rRNA transcription	27	0.0301929	0.0397056	0.0353631	0.0843644
GO:0009306	protein secretion	469	0.033899	0.0248547	0.0401735	0.0221133
GO:0009308	amine metabolic process	77	0.0398076	0.0365813	0.0393819	0.0765153
GO:0009309	amine biosynthetic process	19	0.02082	0.0158747	-0.00970021	0.0570454
GO:0009310	amine catabolic process	20	0.046572	0.0382039	-0.00012545	0.16458
GO:0009311	oligosaccharide metabolic process	41	0.00664153	0.0138195	-0.06051	-0.0584487
GO:0009312	oligosaccharide biosynthetic process	16	0.0129922	-0.0213319	-0.131755	-0.16892
GO:0009313	oligosaccharide catabolic process	11	0.00664153	0.0213149	-0.0816951	-0.0584487
GO:0009314	response to radiation	384	0.0264925	0.0210372	-0.00727911	0.0141057
GO:0009394	2'-deoxyribonucleotide metabolic process	29	0.0503933	0.0203779	0.059485	0.0867346
GO:0009395	phospholipid catabolic process	32	0.0721728	0.0513264	0.0118638	0.185086
GO:0009404	toxin metabolic process	21	0.0268117	0.00348699	0.0327116	-0.100382
GO:0009408	response to heat	119	0.0253761	0.0238272	-0.00251036	0.0191711
GO:0009409	response to cold	43	0.0460638	0.0128033	0.101407	0.0665627
GO:0009410	response to xenobiotic stimulus	240	0.023319	0.0172423	0.0317495	-0.00824836
GO:0009411	response to UV	122	0.0126314	0.0205725	-0.0313344	0.00420863
GO:0009415	response to water	12	0.0565777	0.0347377	0.0928514	0.154177
GO:0009416	response to light stimulus	262	0.0326466	0.022826	-0.00835327	0.0185093
GO:0009435	NAD biosynthetic process	45	0.0349342	0.0256897	0.107447	0.0559178
GO:0009437	carnitine metabolic process	13	0.0341143	0.0396036	-0.0479938	0.00509664
GO:0009451	RNA modification	140	0.0228732	0.0143692	-0.00514342	0.0152452
GO:0009452	7-methylguanosine RNA capping	29	0.0123801	0.0139933	0.0913447	0.114005
GO:0009566	fertilization	130	0.023642	0.0134436	0.00271005	0.00100675
GO:0009581	detection of external stimulus	100	0.0348416	0.0210372	0.0267014	0.0305066
GO:0009582	detection of abiotic stimulus	103	0.0361129	0.0259919	0.0373156	0.0365165
GO:0009583	detection of light stimulus	54	0.0273047	0.0397453	0.033155	0.0567116
GO:0009584	detection of visible light	43	0.0234683	0.0402308	0.0421422	0.074982
GO:0009593	detection of chemical stimulus	270	0.0231585	0.0213035	0.031286	0.0331293
GO:0009595	detection of biotic stimulus	13	0.03691	0.0263168	0.0529926	0.0568478
GO:0009612	response to mechanical stimulus	177	0.0361393	0.02184	0.0657431	0.0354256
GO:0009615	response to virus	264	0.0143749	0.0207916	-0.00037094	0.0295532
GO:0009617	response to bacterium	473	0.0196715	0.0160825	0.013339	0.0120159
GO:0009620	response to fungus	39	-0.00774845	-0.00781268	0.0253121	-0.00898339
GO:0009635	response to herbicide	11	0.00173027	0.0358748	-0.00788475	-0.00351225
GO:0009636	response to toxic substance	435	0.0199246	0.0191766	0.0180268	0.0124208
GO:0009642	response to light intensity	11	-0.00500948	0.0166227	-0.164275	-0.118624
GO:0009648	photoperiodism	23	0.0358673	0.03861	-0.114092	0.118946
GO:0009649	entrainment of circadian clock	23	0.0358673	0.0573975	-0.114092	0.118946
GO:0009650	UV protection	12	0.0728642	0.0344865	-0.00650253	-0.085296
GO:0009651	response to salt stress	18	0.00488292	0.0278487	0.107784	-0.0369216
GO:0009712	catechol-containing compound metabolic process	42	0.0121176	0.0103949	0.00679139	-0.00739175
GO:0009713	catechol-containing compound biosynthetic process	16	-0.0041349	-0.0107084	-0.0644245	0.0134202
GO:0009743	response to carbohydrate	198	0.0478621	0.0233341	0.0368483	-0.0118548
GO:0009746	response to hexose	177	0.042471	0.0232189	0.0504931	-0.0138273
GO:0009749	response to glucose	172	0.0443808	0.0231452	0.0453333	-0.0193573
GO:0009755	hormone-mediated signaling pathway	207	0.0225238	0.022554	0.00307534	-0.000236762
GO:0009791	post-embryonic development	81	0.0252665	0.0183605	0.0218934	0.0130103
GO:0009798	axis specification	65	0.027537	0.015478	0.029551	0.0181724
GO:0009799	specification of symmetry	107	0.0293731	0.0166189	0.029551	0.0192589
GO:0009855	determination of bilateral symmetry	106	0.0289878	0.0125388	0.0276902	0.0210754
GO:0009880	embryonic pattern specification	45	0.0300796	0.0233058	0.0732237	0.112884
GO:0009886	post-embryonic animal morphogenesis	12	0.0588935	0.0277014	0.0436547	0.0256609
GO:0009895	negative regulation of catabolic process	255	0.0233549	0.0174576	-0.0376137	0.0363539
GO:0009896	positive regulation of catabolic process	361	0.0268117	0.0193315	0.0432508	0.0040472
GO:0009913	epidermal cell differentiation	243	0.0184437	0.0144164	0.0327254	0.0228349
GO:0009914	hormone transport	282	0.0330188	0.025548	0.0389129	0.00356444
GO:0009948	anterior/posterior axis specification	32	0.00631097	-0.0156254	-0.0386978	-0.0232535
GO:0009950	dorsal/ventral axis specification	10	0.043765	0.0726016	0.124305	0.306112
GO:0009952	anterior/posterior pattern specification	168	0.0272461	0.00472614	0.0176103	0.0216537
GO:0009953	dorsal/ventral pattern formation	79	0.0350626	0.00993207	0.0565205	0.022892
GO:0009954	proximal/distal pattern formation	28	0.047864	0.0466532	0.159604	0.0925296
GO:0009972	cytidine deamination	10	-0.00300153	0.0134134	0.0463551	-0.105321
GO:0009988	cell-cell recognition	54	0.0301192	0.0136231	-0.0368643	0.0225474
GO:0009991	response to extracellular stimulus	462	0.022945	0.0183454	0.00271345	0.00273535
GO:0009994	oocyte differentiation	34	0.0108199	-0.00486214	-0.0633717	-0.0183497
GO:0010001	glial cell differentiation	178	0.0413169	0.00750289	0.0230136	0.0517535
GO:0010002	cardioblast differentiation	16	0.010648	-0.00326032	-0.0564755	-0.0662054
GO:0010035	response to inorganic substance	470	0.0283342	0.0220818	0.013811	0.0175054
GO:0010038	response to metal ion	313	0.0320554	0.0232189	0.027384	0.00844915
GO:0010039	response to iron ion	28	-0.00713833	0.0494828	-0.0603531	0.00837432
GO:0010042	response to manganese ion	17	-0.0021874	0.0213073	-0.167354	0.0488413
GO:0010043	response to zinc ion	45	0.0229205	0.0184172	-0.0349493	-0.0134707
GO:0010092	specification of animal organ identity	31	0.0282662	-0.0023234	-0.0122757	0.0484857
GO:0010107	potassium ion import	39	0.0670651	0.0239632	0.044436	0.0680641
GO:0010155	regulation of proton transport	15	0.00942206	-0.0351344	-0.0136307	-0.0560281
GO:0010165	response to X-ray	28	-0.0161769	0.026653	-0.0742372	0.00184885
GO:0010171	body morphogenesis	46	0.0329904	0.0286364	0.0582192	0.0331203
GO:0010172	embryonic body morphogenesis	11	0.0850328	0.0462943	0.11813	0.0186072
GO:0010212	response to ionizing radiation	135	0.0114357	0.0171554	-0.0260208	0.00584961
GO:0010224	response to UV-B	17	0.00590484	0.0283946	-0.00250108	-0.0655421
GO:0010225	response to UV-C	12	0.0196186	-0.0243617	-0.0182783	-0.0522641
GO:0010226	response to lithium ion	22	0.00836425	-0.0191955	-0.0188898	-0.0579032
GO:0010248	establishment or maintenance of transmembrane electrochemical gradient	11	0.0489992	0.0417797	0.0526303	0.099196
GO:0010256	endomembrane system organization	350	0.0268325	0.0113847	0.00530735	-0.0153365
GO:0010257	NADH dehydrogenase complex assembly	53	0.0231887	0.0147187	0.0304088	0.0159773
GO:0010259	multicellular organism aging	22	0.033457	0.0367154	0.11524	0.0754324
GO:0010273	detoxification of copper ion	10	-0.0229601	0.00537972	0.0334678	-0.037868
GO:0010288	response to lead ion	19	0.0811113	0.0640466	0.0373167	0.109907
GO:0010310	regulation of hydrogen peroxide metabolic process	14	0.0458334	0.0711358	0.168944	-0.0202043
GO:0010324	membrane invagination	50	0.0181471	0.0128543	-0.0822266	-0.00291312
GO:0010332	response to gamma radiation	48	-0.000800913	0.0187856	-0.130518	0.0301822
GO:0010389	regulation of G2/M transition of mitotic cell cycle	130	0.0344222	0.0282926	0.109098	0.0728029
GO:0010390	histone monoubiquitination	25	0.0448171	0.0133284	-0.0711318	0.00772625
GO:0010421	hydrogen peroxide-mediated programmed cell death	11	0.0333777	0.026789	-0.0373282	-0.0673385
GO:0010447	response to acidic pH	21	0.00982629	0.0368647	0.164401	0.0208225
GO:0010452	histone H3-K36 methylation	12	0.0196205	0.0116359	0.0538386	0.0995201
GO:0010453	regulation of cell fate commitment	27	0.0357237	0.0468496	0.0378175	0.0550432
GO:0010454	negative regulation of cell fate commitment	11	0.0485308	0.0209937	-0.0312056	-0.0337462
GO:0010457	centriole-centriole cohesion	13	0.00193428	0.0272688	-0.108137	0.126993
GO:0010458	exit from mitosis	27	0.0665816	0.0462943	0.186604	0.174149
GO:0010460	positive regulation of heart rate	21	0.0569101	0.0203779	0.0657688	0.0853895
GO:0010463	mesenchymal cell proliferation	40	0.0330395	0.0534307	-0.0405483	0.126242
GO:0010464	regulation of mesenchymal cell proliferation	32	0.0299341	0.0501798	-0.0439686	0.114597
GO:0010466	negative regulation of peptidase activity	201	0.0266643	0.0202079	0.000957329	0.018496
GO:0010469	regulation of signaling receptor activity	437	0.0250663	0.0251834	0.018355	0.0166839
GO:0010470	regulation of gastrulation	36	0.0266303	0.0152211	0.0624833	0.0457474
GO:0010498	proteasomal protein catabolic process	405	0.0200228	0.00918783	-0.0220733	-0.00708569
GO:0010499	proteasomal ubiquitin-independent protein catabolic process	17	0.0243183	-0.0440653	-0.0581898	-0.190112
GO:0010506	regulation of autophagy	269	0.0379376	0.0189083	0.0432508	0.0354278
GO:0010507	negative regulation of autophagy	64	0.0288933	0.0348775	0.0783268	0.0929297
GO:0010508	positive regulation of autophagy	97	0.0278506	0.0189083	0.0411704	-0.0314388
GO:0010517	regulation of phospholipase activity	59	0.0420366	0.0235363	0.0251024	0.0190748
GO:0010518	positive regulation of phospholipase activity	50	0.0432587	0.0223254	-0.0870247	-0.00513406
GO:0010522	regulation of calcium ion transport into cytosol	89	0.0204988	-0.000959584	0.00629974	-0.00812044
GO:0010523	negative regulation of calcium ion transport into cytosol	16	0.0626223	0.00489615	0.0355911	-0.11987
GO:0010524	positive regulation of calcium ion transport into cytosol	48	0.0133605	-8.50025e-05	-0.0134996	-0.013582
GO:0010528	regulation of transposition	18	-2.07784e-05	0.000850025	0.0184616	-0.0608532
GO:0010529	negative regulation of transposition	17	-0.00562906	-0.00168116	0.0107012	-0.0639853
GO:0010543	regulation of platelet activation	23	0.0280659	-0.00807713	-0.0100188	-0.053273
GO:0010544	negative regulation of platelet activation	14	0.0290199	9.63362e-05	0.0349581	-0.0496977
GO:0010559	regulation of glycoprotein biosynthetic process	33	0.0257539	0.0428639	0.115131	0.0248232
GO:0010560	positive regulation of glycoprotein biosynthetic process	17	0.0293731	0.0428639	0.0613549	0.0248232
GO:0010561	negative regulation of glycoprotein biosynthetic process	10	0.0186458	0.0439652	0.118921	0.00134119
GO:0010563	negative regulation of phosphorus metabolic process	495	0.0351382	0.0223613	0.0408531	0.0329246
GO:0010565	regulation of cellular ketone metabolic process	102	0.0275767	0.00190972	0.0314416	-0.00964147
GO:0010566	regulation of ketone biosynthetic process	11	0.0115301	-0.0192597	0.153231	-0.155901
GO:0010569	regulation of double-strand break repair via homologous recombination	35	0.0476468	0.0170572	-0.0373477	0.0905573
GO:0010573	vascular endothelial growth factor production	29	0.00269741	-0.0206122	-0.0492635	-0.0314388
GO:0010574	regulation of vascular endothelial growth factor production	27	0.0138989	-0.0123575	-0.0154593	0.00644903
GO:0010575	positive regulation of vascular endothelial growth factor production	23	0.0322027	-0.00659997	0.00303754	0.0427395
GO:0010586	miRNA metabolic process	26	0.0128977	0.03759	-0.0803877	0.0224826
GO:0010591	regulation of lamellipodium assembly	25	0.0686783	0.0393089	0.0140987	0.0444989
GO:0010592	positive regulation of lamellipodium assembly	14	0.0802953	0.0377373	0.133693	0.0384993
GO:0010594	regulation of endothelial cell migration	140	0.0264868	0.0186571	0.0394792	-0.033881
GO:0010595	positive regulation of endothelial cell migration	89	0.0225238	0.0201475	0.0347361	-0.0331742
GO:0010596	negative regulation of endothelial cell migration	49	0.0268117	0.0138497	0.0750761	-0.0400702
GO:0010608	posttranscriptional regulation of gene expression	487	0.0225162	0.015648	-0.0106741	0.0303898
GO:0010611	regulation of cardiac muscle hypertrophy	52	0.00107481	0.0177636	-0.00813792	0.00134706
GO:0010613	positive regulation of cardiac muscle hypertrophy	28	0.0238423	-0.018591	0.0109586	-0.0294401
GO:0010614	negative regulation of cardiac muscle hypertrophy	25	-0.0113526	0.0291238	-0.0583763	0.133674
GO:0010623	programmed cell death involved in cell development	10	0.00456936	0.0538368	0.0259373	0.142295
GO:0010631	epithelial cell migration	246	0.0339047	0.0231944	0.0478627	-0.0195375
GO:0010632	regulation of epithelial cell migration	194	0.0307634	0.0225578	0.0449143	-0.0179853
GO:0010633	negative regulation of epithelial cell migration	63	0.0261619	-0.00154894	0.0659628	-0.0510435
GO:0010634	positive regulation of epithelial cell migration	127	0.0315529	0.0251834	0.0347361	0.0191711
GO:0010639	negative regulation of organelle organization	330	0.0352307	0.0166737	0.0324733	0.00361844
GO:0010640	regulation of platelet-derived growth factor receptor signaling pathway	23	0.0205442	0.042709	0.10741	-0.0202607
GO:0010642	negative regulation of platelet-derived growth factor receptor signaling pathway	13	0.0439709	0.0561923	0.115829	0.089962
GO:0010644	cell communication by electrical coupling	27	0.0762454	0.0150247	0.138346	0.027675
GO:0010649	regulation of cell communication by electrical coupling	11	0.0403328	-0.0322178	0.0206423	-0.150071
GO:0010656	negative regulation of muscle cell apoptotic process	33	0.0157765	0.0310467	0.0432508	0.0990903
GO:0010657	muscle cell apoptotic process	59	0.0253761	0.0263168	0.013339	0.0507397
GO:0010658	striated muscle cell apoptotic process	35	0.0157765	0.0263168	0.0206423	0.0912922
GO:0010659	cardiac muscle cell apoptotic process	33	0.0100945	0.0251834	-0.00788475	0.0354256
GO:0010660	regulation of muscle cell apoptotic process	56	0.0235098	0.0257501	0.0103831	0.0461249
GO:0010661	positive regulation of muscle cell apoptotic process	22	0.0309881	-0.0110012	-0.166438	-0.0087358
GO:0010662	regulation of striated muscle cell apoptotic process	33	0.0100945	0.0251834	-0.00788475	0.0354256
GO:0010663	positive regulation of striated muscle cell apoptotic process	11	-0.00773334	-0.0333625	-0.195022	-0.0918941
GO:0010664	negative regulation of striated muscle cell apoptotic process	23	0.0157765	0.0286137	0.0364565	0.0990903
GO:0010665	regulation of cardiac muscle cell apoptotic process	31	0.00983763	-0.000226673	-0.0407297	0.0303467
GO:0010666	positive regulation of cardiac muscle cell apoptotic process	11	-0.00773334	-0.0333625	-0.195022	-0.0918941
GO:0010667	negative regulation of cardiac muscle cell apoptotic process	20	0.00996607	0.0141935	0.0296716	0.0647185
GO:0010669	epithelial structure maintenance	21	0.03691	-0.00229696	0.0586047	-0.0673761
GO:0010675	regulation of cellular carbohydrate metabolic process	115	0.0287686	0.0326107	0.117928	0.0910367
GO:0010676	positive regulation of cellular carbohydrate metabolic process	55	0.0184928	0.0369175	0.125911	0.0912922
GO:0010677	negative regulation of cellular carbohydrate metabolic process	33	0.0129695	0.0242918	0.117928	0.0912922
GO:0010712	regulation of collagen metabolic process	37	0.0353384	0.0180696	0.00742722	0.00644903
GO:0010713	negative regulation of collagen metabolic process	11	0.00363811	0.00101247	-0.107618	0.00644903
GO:0010714	positive regulation of collagen metabolic process	23	0.0391616	0.0240538	0.0358431	0.0140334
GO:0010715	regulation of extracellular matrix disassembly	15	0.0767252	0.0109445	0.0635931	0.0324996
GO:0010717	regulation of epithelial to mesenchymal transition	79	0.0520669	0.0249719	0.102042	-0.00959887
GO:0010718	positive regulation of epithelial to mesenchymal transition	46	0.0498436	0.0324049	0.109498	0.00496034
GO:0010719	negative regulation of epithelial to mesenchymal transition	25	0.041587	-0.0100983	0.0977962	-0.0650348
GO:0010720	positive regulation of cell development	462	0.0383966	0.025225	0.0358024	0.00202179
GO:0010721	negative regulation of cell development	300	0.0304101	0.00466947	0.0334742	0.0122411
GO:0010737	protein kinase A signaling	28	0.0220119	0.0466532	0.000349004	0.127087
GO:0010738	regulation of protein kinase A signaling	19	0.0382171	0.0492524	-0.0060818	0.12325
GO:0010742	macrophage derived foam cell differentiation	31	0.0456218	0.0162223	0.00742722	0.0354256
GO:0010743	regulation of macrophage derived foam cell differentiation	26	0.0487801	0.0297018	0.00824457	0.0257324
GO:0010744	positive regulation of macrophage derived foam cell differentiation	14	0.0398756	0.0378941	-0.121212	-0.0112862
GO:0010745	negative regulation of macrophage derived foam cell differentiation	12	0.052796	0.00274086	0.155361	0.0821881
GO:0010752	regulation of cGMP-mediated signaling	15	0.0067322	0.0310958	0.0848557	0.129342
GO:0010755	regulation of plasminogen activation	12	0.0426203	0.0303837	0.0943349	-0.0632495
GO:0010758	regulation of macrophage chemotaxis	17	0.0388972	0.0415681	-0.112669	0.0556115
GO:0010759	positive regulation of macrophage chemotaxis	12	0.0011957	0.0121799	-0.113077	-0.0576179
GO:0010761	fibroblast migration	35	0.0498644	0.00725355	0.0638735	0.0191711
GO:0010762	regulation of fibroblast migration	26	0.0626941	-0.0172328	0.0510483	0.00552532
GO:0010763	positive regulation of fibroblast migration	11	0.0950517	-0.0242843	-0.0100188	-0.00812044
GO:0010765	positive regulation of sodium ion transport	33	0.0234418	0.00515304	0.0537267	-0.030768
GO:0010766	negative regulation of sodium ion transport	18	0.0922901	0.0237044	-0.0140219	0.0409344
GO:0010769	regulation of cell morphogenesis involved in differentiation	268	0.0433853	0.00873637	0.0135057	0.0128632
GO:0010770	positive regulation of cell morphogenesis involved in differentiation	131	0.0451269	0.0139933	0.00291304	0.014259
GO:0010771	negative regulation of cell morphogenesis involved in differentiation	89	0.0295016	0.00729888	0.0166113	0.0123279
GO:0010799	regulation of peptidyl-threonine phosphorylation	38	0.0279224	0.0510034	0.0518357	0.0793105
GO:0010800	positive regulation of peptidyl-threonine phosphorylation	25	0.0232454	0.0392598	0.0732237	0.0680641
GO:0010801	negative regulation of peptidyl-threonine phosphorylation	16	0.0362942	0.0379961	0.124357	0.0468863
GO:0010803	regulation of tumor necrosis factor-mediated signaling pathway	49	0.0191841	0.00424635	0.0304476	0.106234
GO:0010804	negative regulation of tumor necrosis factor-mediated signaling pathway	17	0.0139971	0.025123	-0.0659425	0.117086
GO:0010810	regulation of cell-substrate adhesion	179	0.0335439	0.0228525	0.0342158	0.0191711
GO:0010811	positive regulation of cell-substrate adhesion	100	0.0515512	0.0299379	0.0266425	0.0280794
GO:0010812	negative regulation of cell-substrate adhesion	58	0.0147659	0.0140273	-0.00762852	0.0131761
GO:0010817	regulation of hormone levels	438	0.0313149	0.0194807	0.0389129	0.00705691
GO:0010818	T cell chemotaxis	19	0.0393392	0.0213149	-0.0168241	-0.0509263
GO:0010819	regulation of T cell chemotaxis	13	0.0393392	0.0468081	-0.0144131	-0.0264457
GO:0010820	positive regulation of T cell chemotaxis	12	0.0438519	0.0340615	-0.00448701	-0.0501184
GO:0010821	regulation of mitochondrion organization	158	0.0235608	0.0012637	0.035536	0.00465455
GO:0010822	positive regulation of mitochondrion organization	100	0.0144202	0.013319	-0.00408323	0.00567826
GO:0010823	negative regulation of mitochondrion organization	47	0.0253761	-0.00949006	0.0502942	0.0193432
GO:0010824	regulation of centrosome duplication	37	0.0256443	0.0149113	0.000312983	0.0277282
GO:0010826	negative regulation of centrosome duplication	11	0.0653991	0.0723995	-0.00020992	0.197766
GO:0010827	regulation of glucose transmembrane transport	62	0.0313338	0.0211751	0.0359645	-0.017409
GO:0010828	positive regulation of glucose transmembrane transport	35	0.0500306	-0.0111334	0.0232803	-0.0342302
GO:0010829	negative regulation of glucose transmembrane transport	14	0.0122139	0.0570178	-0.0467253	0.0758252
GO:0010830	regulation of myotube differentiation	47	0.0125502	0.0255499	0.0147385	0.0872583
GO:0010831	positive regulation of myotube differentiation	29	0.0191803	0.0323501	0.0147103	0.0872583
GO:0010832	negative regulation of myotube differentiation	13	0.00530038	0.0228525	0.0364565	0.048772
GO:0010833	telomere maintenance via telomere lengthening	72	0.0247282	0.0308843	-0.0771709	0.0541047
GO:0010837	regulation of keratinocyte proliferation	26	0.0403384	-0.00453725	-0.00168384	-0.0330668
GO:0010839	negative regulation of keratinocyte proliferation	12	0.0171686	-0.0264433	-0.121299	-0.150141
GO:0010842	retina layer formation	21	0.0417608	0.0184739	0.141575	-0.0133385
GO:0010862	positive regulation of pathway-restricted SMAD protein phosphorylation	40	0.0434306	0.022996	-0.0114468	-0.0333086
GO:0010863	positive regulation of phospholipase C activity	36	0.0439954	0.024885	0.0381264	0.0217352
GO:0010866	regulation of triglyceride biosynthetic process	15	0.0527922	-0.0314283	0.0465777	-0.0600072
GO:0010867	positive regulation of triglyceride biosynthetic process	11	0.0593544	-0.0326712	0.0465777	-0.149284
GO:0010869	regulation of receptor biosynthetic process	18	0.00235551	0.025208	0.0696778	-0.0076998
GO:0010870	positive regulation of receptor biosynthetic process	11	0.00107292	0.0185608	0.0797517	-0.0944989
GO:0010874	regulation of cholesterol efflux	21	0.014628	-0.00169249	0.137108	-0.032358
GO:0010875	positive regulation of cholesterol efflux	13	0.0599022	0.00935028	0.15433	-0.0322653
GO:0010876	lipid localization	315	0.0274917	0.0256179	0.0218736	-0.00781203
GO:0010878	cholesterol storage	15	0.056283	-0.0326712	0.00742722	-0.163279
GO:0010880	regulation of release of sequestered calcium ion into cytosol by sarcoplasmic reticulum	24	0.0582891	0.00740089	0.102057	-0.0263955
GO:0010881	regulation of cardiac muscle contraction by regulation of the release of sequestered calcium ion	18	0.0317891	0.0208294	0.191637	-0.0741043
GO:0010882	regulation of cardiac muscle contraction by calcium ion signaling	23	0.0403328	0.02388	0.185481	-0.030768
GO:0010883	regulation of lipid storage	38	0.0523653	0.0120552	0.0332656	-0.00199767
GO:0010884	positive regulation of lipid storage	17	0.0500306	-0.00803179	-0.00852372	-0.0104444
GO:0010885	regulation of cholesterol storage	15	0.056283	-0.0326712	0.00742722	-0.163279
GO:0010888	negative regulation of lipid storage	17	0.0170421	-0.0123575	0.162013	-0.0322653
GO:0010889	regulation of sequestering of triglyceride	10	0.0475769	0.00185117	0.0847203	0.0218702
GO:0010893	positive regulation of steroid biosynthetic process	11	-0.010801	0.0122366	0.0302189	-0.0284328
GO:0010894	negative regulation of steroid biosynthetic process	21	-0.0289462	-0.019951	0.0526303	-0.216487
GO:0010906	regulation of glucose metabolic process	94	0.0379036	0.0314283	0.135192	0.0911644
GO:0010907	positive regulation of glucose metabolic process	37	0.0287686	0.0430982	0.237444	0.136711
GO:0010919	regulation of inositol phosphate biosynthetic process	13	-0.0501175	-0.0115188	0.0539212	-0.0504973
GO:0010921	regulation of phosphatase activity	150	0.0436932	0.0131225	0.0698275	0.0302555
GO:0010922	positive regulation of phosphatase activity	29	0.0169816	0.01371	-0.0231712	0.00339948
GO:0010923	negative regulation of phosphatase activity	89	0.0519838	0.00501704	0.0708999	0.0106317
GO:0010927	cellular component assembly involved in morphogenesis	87	0.0381302	0.0155536	0.0388596	-0.0650504
GO:0010934	macrophage cytokine production	13	0.0607107	0.0210617	0.163147	0.0507397
GO:0010935	regulation of macrophage cytokine production	11	0.0418099	-0.0229771	0.163147	0.0496046
GO:0010939	regulation of necrotic cell death	20	0.0382776	-0.0106178	0.115573	-0.0307625
GO:0010948	negative regulation of cell cycle process	252	0.033559	0.0174633	0.0091904	0.0291227
GO:0010950	positive regulation of endopeptidase activity	146	0.0285911	0.0337366	0.0157638	0.0609395
GO:0010951	negative regulation of endopeptidase activity	192	0.0267248	0.0198906	0.00229408	0.0113799
GO:0010952	positive regulation of peptidase activity	162	0.0319874	0.0360977	0.00809618	0.0609395
GO:0010954	positive regulation of protein processing	25	0.0407483	0.0129695	0.0398189	-0.01246
GO:0010955	negative regulation of protein processing	32	-0.00748589	0.0240822	-0.00345245	0.0488376
GO:0010959	regulation of metal ion transport	326	0.0330792	0.0175559	0.0207363	0.0201354
GO:0010960	magnesium ion homeostasis	11	-0.00423124	-0.015512	-0.105993	-0.0662963
GO:0010962	regulation of glucan biosynthetic process	24	0.0660829	0.0357237	0.284073	0.0809228
GO:0010965	regulation of mitotic sister chromatid separation	51	0.0501175	-0.00777112	-0.0349876	-0.0703909
GO:0010970	transport along microtubule	137	0.0458523	0.0279224	0.0236492	0.0589581
GO:0010971	positive regulation of G2/M transition of mitotic cell cycle	26	0.0308049	-0.00102192	0.00420999	-0.015436
GO:0010972	negative regulation of G2/M transition of mitotic cell cycle	37	0.0448662	0.0291238	0.0172357	0.0831334
GO:0010975	regulation of neuron projection development	433	0.0419232	0.0162223	0.0357075	0.0123279
GO:0010976	positive regulation of neuron projection development	241	0.0456596	0.0290935	0.0290872	0.014259
GO:0010977	negative regulation of neuron projection development	138	0.0324653	0.00716099	0.0620576	-0.00527039
GO:0010984	regulation of lipoprotein particle clearance	22	0.0132037	0.0244127	-0.0806034	0.0806949
GO:0010985	negative regulation of lipoprotein particle clearance	12	0.0132037	0.0472784	-0.182334	0.102764
GO:0010988	regulation of low-density lipoprotein particle clearance	15	0.0100945	0.0232642	-0.113927	0.118319
GO:0010996	response to auditory stimulus	20	0.0315737	-0.0337857	-0.130982	-0.0906559
GO:0010998	regulation of translational initiation by eIF2 alpha phosphorylation	10	-0.00827169	-0.0126635	-0.128304	-0.144035
GO:0014002	astrocyte development	29	0.0811113	0.0354442	0.0640244	0.143388
GO:0014003	oligodendrocyte development	38	0.0776187	-0.00196073	0.00464131	0.0309222
GO:0014009	glial cell proliferation	39	0.0304498	0.00813758	-0.00667347	-0.0459214
GO:0014013	regulation of gliogenesis	102	0.0344619	0.0195638	0.0703007	0.0116754
GO:0014014	negative regulation of gliogenesis	38	0.0340331	0.0153137	0.102721	0.0580079
GO:0014015	positive regulation of gliogenesis	59	0.0339103	0.0228525	0.0859689	0.0169017
GO:0014020	primary neural tube formation	86	0.0136779	0.00890449	0.039559	-0.0341334
GO:0014029	neural crest formation	11	0.0300796	0.043612	-0.0567576	0.121072
GO:0014031	mesenchymal cell development	77	0.0293391	0.0228525	0.0568614	0.044632
GO:0014032	neural crest cell development	73	0.0293655	0.0236571	0.0624227	0.0556115
GO:0014033	neural crest cell differentiation	81	0.0293731	0.0236571	0.0190692	0.0640036
GO:0014037	Schwann cell differentiation	32	0.0327298	-0.027129	0.015417	-0.0404704
GO:0014044	Schwann cell development	24	0.038712	-0.0177844	0.104082	-0.0404704
GO:0014046	dopamine secretion	33	0.0588558	0.0383343	0.166994	0.108912
GO:0014047	glutamate secretion	31	0.0588558	0.0548134	0.107856	0.110847
GO:0014048	regulation of glutamate secretion	16	0.0524843	0.0824109	0.0521062	0.185017
GO:0014049	positive regulation of glutamate secretion	10	0.0267078	0.102745	0.0298455	0.185017
GO:0014059	regulation of dopamine secretion	33	0.0588558	0.0383343	0.166994	0.108912
GO:0014061	regulation of norepinephrine secretion	14	0.0575788	0.0235363	0.0541242	0.0726465
GO:0014065	phosphatidylinositol 3-kinase signaling	118	0.0334117	0.0246186	0.0369715	0.0830149
GO:0014066	regulation of phosphatidylinositol 3-kinase signaling	92	0.0334117	0.0160409	0.020506	0.0648872
GO:0014067	negative regulation of phosphatidylinositol 3-kinase signaling	13	0.0252779	-0.0101059	-0.0136307	-0.111635
GO:0014068	positive regulation of phosphatidylinositol 3-kinase signaling	59	0.0249643	0.0139933	-0.0311256	0.0652068
GO:0014072	response to isoquinoline alkaloid	29	0.00261808	-0.000173783	0.0775692	-0.0245096
GO:0014074	response to purine-containing compound	135	0.0238952	0.0206197	-0.0306116	0.0493879
GO:0014075	response to amine	43	0.0212431	0.0392598	0.0502912	0.0679434
GO:0014706	striated muscle tissue development	320	0.0269005	0.00292786	0.028545	-0.0101676
GO:0014733	regulation of skeletal muscle adaptation	10	0.032046	0.0167342	-0.0477167	-0.15855
GO:0014741	negative regulation of muscle hypertrophy	27	-0.0113526	0.0228525	-0.112669	0.0271943
GO:0014742	positive regulation of muscle hypertrophy	28	0.0238423	-0.018591	0.0109586	-0.0294401
GO:0014743	regulation of muscle hypertrophy	54	-0.000281453	0.0177636	-0.0157212	-0.0260009
GO:0014808	release of sequestered calcium ion into cytosol by sarcoplasmic reticulum	28	0.0404102	-0.00287875	0.0842963	-0.0741043
GO:0014812	muscle cell migration	79	0.0401212	0.00726866	0.028196	-0.0342302
GO:0014819	regulation of skeletal muscle contraction	12	0.0479395	0.0195789	0.0318304	0.0841647
GO:0014821	phasic smooth muscle contraction	15	0.00721577	0.00491504	0.0914931	0.0888081
GO:0014823	response to activity	62	0.00414246	0.0121214	-0.0386654	-0.0462102
GO:0014829	vascular smooth muscle contraction	20	0.035225	0.0268004	0.117702	-0.0116195
GO:0014831	gastro-intestinal system smooth muscle contraction	11	-0.0219533	-0.0231849	0.0935965	-0.136306
GO:0014841	skeletal muscle satellite cell proliferation	13	0.0233171	-0.000226673	0.0506014	-0.0449183
GO:0014842	regulation of skeletal muscle satellite cell proliferation	12	0.0158709	-0.0086797	-0.0310337	-0.0768521
GO:0014850	response to muscle activity	22	0.0139801	0.0384759	-0.00959546	-0.0180576
GO:0014854	response to inactivity	13	0.0300304	0.00491504	0.123538	-0.00790761
GO:0014855	striated muscle cell proliferation	60	0.0382568	-0.00398567	0.0512198	-0.0110132
GO:0014856	skeletal muscle cell proliferation	15	0.00981118	-0.000226673	0.0506014	-0.0449183
GO:0014857	regulation of skeletal muscle cell proliferation	14	0.00911794	-0.0086797	-0.0310337	-0.0768521
GO:0014866	skeletal myofibril assembly	11	0.0343977	-0.0485006	0.1478	-0.21627
GO:0014870	response to muscle inactivity	10	0.0325125	-0.00333588	0.127533	0.0337602
GO:0014874	response to stimulus involved in regulation of muscle adaptation	14	0.0396565	0.0194467	0.107208	0.0872592
GO:0014887	cardiac muscle adaptation	21	0.024647	0.0213791	-0.017306	0.0801513
GO:0014888	striated muscle adaptation	38	0.0295223	0.0211902	0.0454671	0.0437842
GO:0014896	muscle hypertrophy	77	0.0120892	0.0174576	-0.0106741	-0.0281122
GO:0014897	striated muscle hypertrophy	75	0.0120892	0.0180696	-0.0106741	-0.0275017
GO:0014898	cardiac muscle hypertrophy in response to stress	21	0.024647	0.0213791	-0.017306	0.0801513
GO:0014902	myotube differentiation	92	0.0357785	0.00697399	0.0353366	0.0390096
GO:0014904	myotube cell development	32	0.0416909	-0.00692676	0.0977726	-0.00642684
GO:0014909	smooth muscle cell migration	67	0.0339103	0.00801668	0.028196	-0.0335318
GO:0014910	regulation of smooth muscle cell migration	61	0.0247074	0.00801668	-0.0376137	-0.0212174
GO:0014911	positive regulation of smooth muscle cell migration	37	0.00849648	0.0206197	-0.11336	-0.0486131
GO:0014912	negative regulation of smooth muscle cell migration	24	0.0443732	0.0163262	0.0654593	0.0299806
GO:0015012	heparan sulfate proteoglycan biosynthetic process	22	0.0322726	0.0389425	0.0668332	0.062706
GO:0015669	gas transport	17	0.0129317	0.0177712	0.105975	0.0410805
GO:0015671	oxygen transport	13	0.0129317	0.000982251	-0.063126	0.0848999
GO:0015672	monovalent inorganic cation transport	442	0.0405953	0.0236213	0.0460726	0.0478858
GO:0015682	ferric iron transport	34	0.0497246	0.0366682	0.217845	0.126912
GO:0015693	magnesium ion transport	13	0.0588066	0.0384363	0.0536537	-0.026367
GO:0015695	organic cation transport	32	0.0278449	-0.0129638	0.0532223	0.0139553
GO:0015696	ammonium transport	94	0.0372972	0.02827	0.104796	0.0468292
GO:0015697	quaternary ammonium group transport	11	-0.00778245	0.0849232	0.0558371	0.0972063
GO:0015698	inorganic anion transport	151	0.0379149	0.0231811	0.0271507	-0.00530474
GO:0015701	bicarbonate transport	38	0.0199813	-0.00894793	0.0204077	0.0274361
GO:0015711	organic anion transport	391	0.0312545	0.0221044	0.0227055	0.0227092
GO:0015718	monocarboxylic acid transport	130	0.013438	0.022129	0.00824457	-0.0410055
GO:0015721	bile acid and bile salt transport	20	0.0418307	-0.0226636	0.000605094	-0.0829555
GO:0015732	prostaglandin transport	14	-0.000281453	0.0492354	-0.180858	-0.0224525
GO:0015740	C4-dicarboxylate transport	20	0.046128	0.00981685	-0.159899	-0.0644381
GO:0015748	organophosphate ester transport	87	0.0295167	0.0311676	0.0373156	0.0276306
GO:0015749	monosaccharide transmembrane transport	92	0.0313338	0.0170534	0.0036866	-0.00252296
GO:0015800	acidic amino acid transport	53	0.0725053	0.0454971	0.0502912	0.110847
GO:0015802	basic amino acid transport	13	0.0423275	0.0137289	0.170999	0.00293084
GO:0015804	neutral amino acid transport	31	0.0243485	-0.00965629	0.106107	0.0488526
GO:0015807	L-amino acid transport	57	0.0510242	-0.00893093	0.106107	0.0354256
GO:0015812	gamma-aminobutyric acid transport	13	0.0186514	0.0167058	0.0539212	-0.048947
GO:0015813	L-glutamate transmembrane transport	21	0.0938655	0.0206197	0.0539212	-0.0263402
GO:0015816	glycine transport	11	0.000328676	-0.0182245	0.14292	0.136031
GO:0015837	amine transport	89	0.0502422	0.0286289	0.0662675	0.0607104
GO:0015844	monoamine transport	76	0.0352175	0.0249076	0.0592128	0.0120552
GO:0015849	organic acid transport	266	0.0306141	0.0228203	0.00923088	0.00863963
GO:0015850	organic hydroxy compound transport	205	0.0300796	0.0153533	0.0506678	-0.038516
GO:0015865	purine nucleotide transport	16	0.00307898	0.0208823	-0.0272978	-0.0151994
GO:0015868	purine ribonucleotide transport	15	-0.0174841	0.000846247	0.0332138	-0.0461159
GO:0015872	dopamine transport	44	0.0400815	0.0325919	0.070139	0.0217087
GO:0015874	norepinephrine transport	19	0.0493695	0.0218891	0.0579571	0.0607104
GO:0015893	drug transport	193	0.0328828	0.0137289	0.034811	0.0217362
GO:0015908	fatty acid transport	78	0.0124878	0.0345507	0.00709774	-0.01543
GO:0015909	long-chain fatty acid transport	57	0.014628	0.0392863	-0.00583907	-0.00397096
GO:0015914	phospholipid transport	62	0.0335477	0.0339557	0.0324466	0.014819
GO:0015918	sterol transport	83	0.0193995	0.0136911	0.0413375	-0.0322653
GO:0015919	peroxisomal membrane transport	16	0.000980363	0.00421801	0.0513706	-0.0751447
GO:0015931	nucleobase-containing compound transport	213	0.021704	0.0148169	-0.00306754	0.0157171
GO:0015936	coenzyme A metabolic process	15	-0.0364189	-0.0262148	0.0173196	-0.126703
GO:0015937	coenzyme A biosynthetic process	10	-0.0347113	-0.0153685	0.00981201	-0.141659
GO:0015949	nucleobase-containing small molecule interconversion	23	0.0585195	-0.0136911	0.143002	-0.0378023
GO:0015980	energy derivation by oxidation of organic compounds	215	0.0367967	0.0207255	0.045275	-0.00219944
GO:0015985	energy coupled proton transport, down electrochemical gradient	19	0.00552328	-0.0271933	-0.0305477	-0.0491355
GO:0015986	ATP synthesis coupled proton transport	19	0.00552328	-0.0271933	-0.0305477	-0.0491355
GO:0015988	energy coupled proton transmembrane transport, against electrochemical gradient	26	0.0541334	0.0504027	0.305027	0.116006
GO:0015991	ATP hydrolysis coupled proton transport	26	0.0541334	0.0504027	0.305027	0.116006
GO:0016024	CDP-diacylglycerol biosynthetic process	12	0.0586291	0.0351552	0.232375	0.176374
GO:0016042	lipid catabolic process	259	0.0298302	0.0263432	0.0465777	0.0244565
GO:0016048	detection of temperature stimulus	15	0.0084247	0.0284173	0.0244085	-0.0858799
GO:0016049	cell growth	430	0.0317286	0.0194429	0.0268237	0.0202829
GO:0016050	vesicle organization	277	0.0381265	0.00961095	0.0172357	0.00783969
GO:0016051	carbohydrate biosynthetic process	185	0.030718	0.0150738	0.0497402	0.0487481
GO:0016052	carbohydrate catabolic process	128	0.0375315	0.0387838	0.053738	0.0475654
GO:0016053	organic acid biosynthetic process	339	0.0376467	0.0280622	0.0384374	0.0226813
GO:0016054	organic acid catabolic process	225	0.0397623	0.0192068	0.0895371	-0.00397096
GO:0016055	Wnt signaling pathway	405	0.0307369	0.0233058	0.0216799	0.0427395
GO:0016056	rhodopsin mediated signaling pathway	22	0.00511337	0.041366	-0.0275907	0.0718865
GO:0016064	immunoglobulin mediated immune response	90	0.0181754	0.0209767	0.0262503	-0.0045215
GO:0016072	rRNA metabolic process	215	0.0360033	0.0126522	0.00915003	-0.00230754
GO:0016073	snRNA metabolic process	84	0.00898193	0.0100662	-0.000199203	0.0425804
GO:0016074	snoRNA metabolic process	16	0.0211959	0.0362186	0.0373136	0.0977963
GO:0016075	rRNA catabolic process	17	-0.0167436	-0.0416097	0.0152619	-0.0436442
GO:0016079	synaptic vesicle exocytosis	114	0.0559732	0.0382058	0.0810869	0.0257465
GO:0016081	synaptic vesicle docking	11	0.0650137	-0.0066642	-0.0499693	0.0271977
GO:0016082	synaptic vesicle priming	17	0.0409032	-0.0177296	0.0777328	0.101188
GO:0016101	diterpenoid metabolic process	74	0.0251683	0.00632986	0.0391891	0.0194759
GO:0016102	diterpenoid biosynthetic process	10	0.0262526	0.021959	0.1234	0.130639
GO:0016114	terpenoid biosynthetic process	15	0.0384778	0.0303893	0.0687989	0.0959318
GO:0016125	sterol metabolic process	129	0.0284928	0.00436346	0.0302189	0.0221133
GO:0016126	sterol biosynthetic process	63	0.0208048	-0.00377033	0.0289558	0.0159746
GO:0016137	glycoside metabolic process	18	0.0131282	-0.0145845	0.139533	0.0129055
GO:0016180	snRNA processing	24	-0.027197	-0.0403856	-0.0599616	-0.0641058
GO:0016188	synaptic vesicle maturation	12	0.0498663	-0.00293542	-0.0371615	0.0744431
GO:0016197	endosomal transport	178	0.026347	0.00942206	4.81342e-05	0.00499282
GO:0016202	regulation of striated muscle tissue development	119	0.0401212	0.0220629	0.0357075	0.035116
GO:0016226	iron-sulfur cluster assembly	18	0.0605482	0.0353573	0.153101	-0.0172367
GO:0016233	telomere capping	47	0.021874	0.0313414	0.00818467	0.0556115
GO:0016236	macroautophagy	246	0.0394997	0.0258785	0.00868284	0.0342787
GO:0016239	positive regulation of macroautophagy	56	0.049207	0.0239197	0.0433585	0.0168332
GO:0016241	regulation of macroautophagy	143	0.0395054	0.0277562	0.0278942	0.0506505
GO:0016242	negative regulation of macroautophagy	26	0.028593	0.0443562	0.0667598	0.0946131
GO:0016246	RNA interference	13	0.0123159	0.000676242	0.0873822	-0.146256
GO:0016254	preassembly of GPI anchor in ER membrane	13	0.0252401	0.00468836	0.215986	0.00303497
GO:0016264	gap junction assembly	11	0.023642	-0.000857581	0.0504931	-0.111845
GO:0016266	O-glycan processing	45	0.0225767	0.00537216	0.0484348	0.0278501
GO:0016311	dephosphorylation	416	0.0450343	0.0184361	0.0460812	0.0239135
GO:0016322	neuron remodeling	10	0.0570103	0.0357313	0.0485029	-0.0143066
GO:0016331	morphogenesis of embryonic epithelium	131	0.0228865	0.0105894	0.0732237	-0.00793792
GO:0016338	calcium-independent cell-cell adhesion via plasma membrane cell-adhesion molecules	16	0.036247	-0.0159559	0.0886727	-0.147168
GO:0016339	calcium-dependent cell-cell adhesion via plasma membrane cell adhesion molecules	42	0.0311752	-0.0105176	-0.0207186	-0.0263563
GO:0016358	dendrite development	197	0.0506048	0.0231698	0.0437636	0.0244966
GO:0016441	posttranscriptional gene silencing	140	0.0125879	0.0251702	3.80075e-06	0.0450528
GO:0016444	somatic cell DNA recombination	53	-0.00162071	0.0271026	0.126917	-0.0161058
GO:0016445	somatic diversification of immunoglobulins	53	-0.00143182	0.0322707	0.0737957	-0.026436
GO:0016446	somatic hypermutation of immunoglobulin genes	13	-0.0319798	0.0521009	0.142195	-0.0668408
GO:0016447	somatic recombination of immunoglobulin gene segments	46	0.00506048	0.0273916	0.100356	-0.0301884
GO:0016458	gene silencing	231	0.0210806	0.0211713	-0.00290544	0.0391562
GO:0016482	cytosolic transport	129	0.0275484	0.027775	-0.0137813	0.0292748
GO:0016485	protein processing	212	0.0292333	0.022044	0.0273612	0.0538538
GO:0016486	peptide hormone processing	28	0.00381756	0.00670198	-0.0106309	0.0692994
GO:0016525	negative regulation of angiogenesis	98	0.0264755	0.0247735	0.0463178	0.00819883
GO:0016540	protein autoprocessing	12	0.0451382	0.012433	0.11046	-0.0160211
GO:0016553	base conversion or substitution editing	15	0.0364113	0.0234456	0.026222	-0.0639853
GO:0016554	cytidine to uridine editing	10	0.00209862	-0.00162071	0.0174752	-0.110931
GO:0016556	mRNA modification	20	0.0286194	0.0302269	-0.0115218	-0.0463156
GO:0016558	protein import into peroxisome matrix	12	0.0341238	0.024596	0.188194	0.108292
GO:0016569	covalent chromatin modification	420	0.0274407	0.0177655	5.15315e-05	0.0463723
GO:0016570	histone modification	410	0.0265113	0.0174047	-0.00724482	0.0463723
GO:0016571	histone methylation	123	0.0273444	0.0070231	0.0477475	0.0271943
GO:0016572	histone phosphorylation	33	0.0204837	-0.000226673	0.120191	-0.00526796
GO:0016573	histone acetylation	138	0.0249681	0.0149359	-0.0555663	0.0262004
GO:0016574	histone ubiquitination	39	0.0386176	0.0174274	-0.0308249	0.0825735
GO:0016575	histone deacetylation	80	0.0276088	0.0446018	-0.00937989	0.0621721
GO:0016577	histone demethylation	28	0.0240614	-0.00770312	-0.102362	0.0777281
GO:0016578	histone deubiquitination	18	0.0751441	0.0532853	-0.0597627	0.168546
GO:0016579	protein deubiquitination	229	0.0252892	0.00947117	-0.00854911	0.00256766
GO:0016584	nucleosome positioning	12	0.0316549	-0.0472652	0.0662548	-0.112938
GO:0016601	Rac protein signal transduction	31	0.0682514	0.0343146	0.0178543	0.0306546
GO:0016925	protein sumoylation	46	0.0246545	0.0108973	0.02427	-0.0859287
GO:0016973	poly(A)+ mRNA export from nucleus	11	0.00590862	-0.010053	-0.0475393	-0.0842574
GO:0016999	antibiotic metabolic process	127	0.0282964	0.0290369	0.0565446	0.0349887
GO:0017000	antibiotic biosynthetic process	16	0.0308427	0.023914	-0.0366478	-0.109666
GO:0017001	antibiotic catabolic process	47	0.0407483	0.0387234	0.044354	0.0457882
GO:0017004	cytochrome complex assembly	23	0.040363	-0.00190406	0.126125	0.0742939
GO:0017014	protein nitrosylation	13	0.00573106	-0.01337	0.0640244	0.00587244
GO:0017015	regulation of transforming growth factor beta receptor signaling pathway	102	0.0409391	0.00709677	0.0674321	-0.00240166
GO:0017038	protein import	187	0.0253761	0.0209786	0.0432508	0.0303216
GO:0017085	response to insecticide	13	0.00173027	0.0358748	-0.0172833	-0.0937027
GO:0017121	phospholipid scrambling	10	0.0704293	0.0319931	-0.0739598	0.0688874
GO:0017145	stem cell division	38	0.0554103	0.0233436	-0.0171659	-0.028261
GO:0017148	negative regulation of translation	123	0.0250247	0.0127315	-0.0533489	0.0528111
GO:0017156	calcium ion regulated exocytosis	141	0.0569101	0.0286289	0.0838563	0.0109815
GO:0017157	regulation of exocytosis	184	0.0445224	0.0234399	0.0618748	-0.00854173
GO:0017158	regulation of calcium ion-dependent exocytosis	97	0.0522936	0.0241407	0.0751287	-0.0119957
GO:0018022	peptidyl-lysine methylation	113	0.0253912	0.00393656	0.00273362	0.0271943
GO:0018023	peptidyl-lysine trimethylation	39	0.0291993	0.00684176	-0.063133	0.0271943
GO:0018027	peptidyl-lysine dimethylation	13	0.0252665	-0.00993585	0.11321	0.132744
GO:0018065	protein-cofactor linkage	10	0.0435515	0.0183247	-0.00911506	0.0717993
GO:0018105	peptidyl-serine phosphorylation	243	0.0336761	0.0249454	0.00417311	-0.00873447
GO:0018107	peptidyl-threonine phosphorylation	100	0.0362942	0.0255725	0.00231027	-0.0551731
GO:0018108	peptidyl-tyrosine phosphorylation	329	0.0365058	0.0192484	0.0236788	0.0354256
GO:0018119	peptidyl-cysteine S-nitrosylation	13	0.00573106	-0.01337	0.0640244	0.00587244
GO:0018126	protein hydroxylation	23	0.0505708	0.0534156	0.092181	0.0338536
GO:0018146	keratan sulfate biosynthetic process	23	0.0276844	0.0125426	0.0914697	-0.0520004
GO:0018149	peptide cross-linking	48	0.023234	0.0152495	-0.0110499	0.0187195
GO:0018158	protein oxidation	14	0.0160957	0.0260202	-0.0647466	0.0174998
GO:0018195	peptidyl-arginine modification	25	0.0272462	0.00192295	0.134261	0.000187552
GO:0018196	peptidyl-asparagine modification	21	0.0419724	0.0153571	0.0798925	0.123818
GO:0018198	peptidyl-cysteine modification	43	0.0303365	0.015886	0.000471619	-0.0448834
GO:0018200	peptidyl-glutamic acid modification	19	0.0155158	0.00734422	0.0547422	-0.0129694
GO:0018205	peptidyl-lysine modification	323	0.027537	0.00928228	-0.00684983	-0.00265562
GO:0018206	peptidyl-methionine modification	10	0.00283153	-0.0108161	-0.0706824	-0.00858466
GO:0018208	peptidyl-proline modification	44	0.0302741	0.0463547	0.0868583	0.134585
GO:0018209	peptidyl-serine modification	259	0.0333777	0.0237025	0.00170749	-0.00873447
GO:0018210	peptidyl-threonine modification	106	0.0286043	0.0237913	-0.00535352	-0.0496254
GO:0018212	peptidyl-tyrosine modification	332	0.0365568	0.0195071	0.0240436	0.0366582
GO:0018216	peptidyl-arginine methylation	15	0.0390861	0.0319496	0.15518	0.0458539
GO:0018230	peptidyl-L-cysteine S-palmitoylation	20	0.0357955	-0.00364189	0.0579425	-0.0889343
GO:0018231	peptidyl-S-diacylglycerol-L-cysteine biosynthetic process from peptidyl-cysteine	20	0.0357955	-0.00364189	0.0579425	-0.0889343
GO:0018279	protein N-linked glycosylation via asparagine	20	0.0402912	0.0163356	0.068712	0.127731
GO:0018345	protein palmitoylation	30	0.0357955	0.000462792	0.131372	-0.0817018
GO:0018393	internal peptidyl-lysine acetylation	143	0.0229356	0.0144844	-0.0539518	0.0427634
GO:0018394	peptidyl-lysine acetylation	151	0.0229734	0.0119419	-0.0479938	0.0181724
GO:0018410	C-terminal protein amino acid modification	12	0.0110862	-0.0310524	-0.0554077	-0.0162838
GO:0018904	ether metabolic process	15	-0.030106	0.0548739	-0.134226	0.111309
GO:0018958	phenol-containing compound metabolic process	80	0.0253836	0.0140859	0.00679139	-0.00739175
GO:0019042	viral latency	11	-0.00548927	-0.0101776	0.0965295	0.0191706
GO:0019048	modulation by virus of host morphology or physiology	34	0.0244505	0.00959584	-0.0115998	-0.0101077
GO:0019054	modulation by virus of host process	22	0.0147904	0.00959584	0.048612	-0.0477821
GO:0019058	viral life cycle	257	0.03031	0.015138	0.0180244	0.00460717
GO:0019068	virion assembly	33	0.0202117	0.0101776	0.0477311	0.065312
GO:0019076	viral release from host cell	32	0.0187006	0.0063563	0.0673093	-0.114027
GO:0019079	viral genome replication	105	0.0169892	0.0144995	-0.00983988	-0.00597354
GO:0019080	viral gene expression	60	0.0367381	-0.00496415	-0.0242069	-0.0126054
GO:0019081	viral translation	13	0.0515795	-0.0116661	-0.0480416	0.0215368
GO:0019083	viral transcription	47	0.0312998	-0.00288253	-0.0178023	-0.0772589
GO:0019098	reproductive behavior	25	0.033967	0.0380698	-0.0230139	0.143388
GO:0019184	nonribosomal peptide biosynthetic process	16	0.0493204	0.0283247	0.0522994	0.0709836
GO:0019216	regulation of lipid metabolic process	328	0.0359901	0.0116113	0.0366116	-0.00169088
GO:0019217	regulation of fatty acid metabolic process	71	0.0299738	0.0115415	0.0309141	-0.00238336
GO:0019218	regulation of steroid metabolic process	92	0.0154705	-0.00293353	0.0161101	-0.00340785
GO:0019226	transmission of nerve impulse	62	0.0228449	0.0242522	-0.0676673	-0.00447376
GO:0019228	neuronal action potential	28	0.0238007	0.00364944	-0.115818	-0.00519722
GO:0019229	regulation of vasoconstriction	51	0.0065093	0.0218891	0.0579571	-0.0909962
GO:0019233	sensory perception of pain	86	0.0318382	0.0317891	0.0695614	0.0157404
GO:0019318	hexose metabolic process	214	0.0290935	0.0234343	0.0544679	0.0366555
GO:0019319	hexose biosynthetic process	80	0.0309542	0.0156102	0.0553405	0.114054
GO:0019320	hexose catabolic process	50	0.0344034	0.0344487	0.104778	0.0520251
GO:0019321	pentose metabolic process	14	0.0742412	0.0202193	-0.058022	-0.0271613
GO:0019359	nicotinamide nucleotide biosynthetic process	88	0.039428	0.0307841	0.0783131	0.0475654
GO:0019362	pyridine nucleotide metabolic process	123	0.0384023	0.0393127	0.0584504	0.0469985
GO:0019363	pyridine nucleotide biosynthetic process	88	0.039428	0.0307841	0.0783131	0.0475654
GO:0019369	arachidonic acid metabolic process	41	0.016226	0.0318174	0.0657158	-0.0202853
GO:0019370	leukotriene biosynthetic process	14	0.00688898	0.0778888	0.0638823	0.187019
GO:0019371	cyclooxygenase pathway	11	0.0376467	-0.00971673	0.0657158	-0.234644
GO:0019372	lipoxygenase pathway	11	0.0137666	0.0327959	0.170579	-0.0436592
GO:0019373	epoxygenase P450 pathway	14	0.00880437	-0.00120326	-0.0247466	-0.0221979
GO:0019377	glycolipid catabolic process	11	0.00937672	-0.00398567	-0.138143	-0.0663514
GO:0019388	galactose catabolic process	10	0.073922	0.0614002	0.0133827	-0.0145037
GO:0019395	fatty acid oxidation	84	0.0387442	0.00852859	0.0672418	0.00135664
GO:0019400	alditol metabolic process	22	0.0278771	-0.00915572	0.130964	-0.0409646
GO:0019430	removal of superoxide radicals	20	0.0464322	0.0221913	-0.0117703	0.0822492
GO:0019432	triglyceride biosynthetic process	32	0.0404593	-0.01939	0.145899	-0.0332205
GO:0019433	triglyceride catabolic process	25	0.0166114	0.0600345	0.162013	0.204113
GO:0019471	4-hydroxyproline metabolic process	13	0.0163696	0.0510809	0.0538312	0.177316
GO:0019511	peptidyl-proline hydroxylation	13	0.0429584	0.0762718	0.0714781	0.245522
GO:0019627	urea metabolic process	10	0.0195222	-0.0223859	-0.21971	-0.0791991
GO:0019646	aerobic electron transport chain	11	0.0127239	0.000445791	-0.00795736	-0.0547915
GO:0019674	NAD metabolic process	60	0.0319062	0.0337252	0.0722493	0.0720035
GO:0019682	glyceraldehyde-3-phosphate metabolic process	21	0.0248887	0.0548247	0.100297	-0.025635
GO:0019692	deoxyribose phosphate metabolic process	31	0.0525467	0.0400532	0.0769935	0.108424
GO:0019693	ribose phosphate metabolic process	442	0.0300909	0.0235835	0.0514864	0.0094229
GO:0019722	calcium-mediated signaling	183	0.0403328	0.0150247	0.0172611	0.027675
GO:0019724	B cell mediated immunity	90	0.0181754	0.0209767	0.0262503	-0.0045215
GO:0019730	antimicrobial humoral response	80	-0.00666042	0.0020325	-0.0545032	-0.0160224
GO:0019731	antibacterial humoral response	32	0.0215718	-0.000732911	-0.10172	0.0253818
GO:0019748	secondary metabolic process	52	0.0255064	0.0133926	0.0754247	-0.0243374
GO:0019751	polyol metabolic process	103	0.0384174	0.0230602	0.0539212	-0.0107362
GO:0019827	stem cell population maintenance	133	0.0342315	0.0230716	0.0567082	0.0550432
GO:0019835	cytolysis	24	0.0172158	0.0214244	-0.025834	-0.028402
GO:0019852	L-ascorbic acid metabolic process	10	0.0147432	0.0199756	0.13258	0.289395
GO:0019882	antigen processing and presentation	151	0.0349833	0.0232189	0.014031	0.0180911
GO:0019883	antigen processing and presentation of endogenous antigen	15	0.0497057	0.0535856	0.0199771	0.020166
GO:0019884	antigen processing and presentation of exogenous antigen	115	0.0295393	0.0119192	0.013576	0.0160392
GO:0019886	antigen processing and presentation of exogenous peptide antigen via MHC class II	86	0.0301816	0.012246	0.0228999	0.000825093
GO:0019896	axonal transport of mitochondrion	11	0.0505671	0.0358748	-0.0239747	0.0600696
GO:0019915	lipid storage	55	0.0456218	0.00759734	0.0232803	-0.032358
GO:0019932	second-messenger-mediated signaling	364	0.0329602	0.0235533	0.0126114	0.0145087
GO:0019933	cAMP-mediated signaling	151	0.0232454	0.0261354	0.015662	-0.00450124
GO:0019934	cGMP-mediated signaling	32	0.0270365	0.0329526	0.0412865	0.0987545
GO:0019935	cyclic-nucleotide-mediated signaling	178	0.0227127	0.0273746	0.010833	0.00700428
GO:0019985	translesion synthesis	34	0.00959206	0.00653386	-0.0458785	0.0508709
GO:0020027	hemoglobin metabolic process	13	0.00231962	0.015478	-0.0975928	-0.0117562
GO:0021510	spinal cord development	94	0.0294203	0.0203836	0.073947	-0.00900745
GO:0021511	spinal cord patterning	23	0.0558297	0.000521349	0.109632	-0.115218
GO:0021513	spinal cord dorsal/ventral patterning	21	0.0582588	-0.0113526	0.109632	-0.128788
GO:0021514	ventral spinal cord interneuron differentiation	16	0.0315341	0.0535497	0.127915	-0.00911593
GO:0021515	cell differentiation in spinal cord	48	0.0135966	0.00391012	0.00532241	-0.0177394
GO:0021516	dorsal spinal cord development	19	0.00170383	0.0201475	-0.0632238	-0.0505478
GO:0021517	ventral spinal cord development	42	0.0277373	0.014985	0.0315136	0.0188601
GO:0021520	spinal cord motor neuron cell fate specification	11	-0.00278053	0.000861359	0.0509693	0.0500069
GO:0021521	ventral spinal cord interneuron specification	10	0.0309523	0.031432	0.221913	-0.00911593
GO:0021522	spinal cord motor neuron differentiation	30	0.0247527	0.00510582	0.0803008	0.0364495
GO:0021527	spinal cord association neuron differentiation	13	-0.0289424	-0.00435213	-0.106135	-0.0682388
GO:0021532	neural tube patterning	38	0.0343845	0.00964118	-0.0102671	0.0484145
GO:0021533	cell differentiation in hindbrain	18	0.0352364	0.0178128	-0.0228117	-0.0358104
GO:0021535	cell migration in hindbrain	14	0.0236477	-0.00791846	0.077547	-0.0911795
GO:0021536	diencephalon development	65	0.0210428	0.0289575	0.0659628	0.0640036
GO:0021537	telencephalon development	227	0.0327808	0.000188895	0.000312983	-0.00467637
GO:0021542	dentate gyrus development	16	0.0380226	-0.00619763	-0.0283613	-0.0639595
GO:0021543	pallium development	154	0.032352	0.000829247	0.00358865	-0.0240007
GO:0021544	subpallium development	25	0.0423464	0.00491504	0.0258294	-0.0283124
GO:0021545	cranial nerve development	43	0.0156518	0.0273104	0.0180268	0.0640036
GO:0021548	pons development	10	0.017775	0.0206405	-0.0321766	0.00235226
GO:0021549	cerebellum development	88	0.0403668	0.0155082	0.0153211	0.00134568
GO:0021554	optic nerve development	11	-0.00278053	0.0480397	0.0552704	0.0500069
GO:0021561	facial nerve development	10	0.00789957	0.00693621	-0.079804	-0.0337548
GO:0021575	hindbrain morphogenesis	38	0.0319893	-0.00109559	0.0124763	-0.0100701
GO:0021587	cerebellum morphogenesis	34	0.0367456	-0.00120515	0.0124763	-0.0235131
GO:0021591	ventricular system development	26	0.0342409	0.0144391	-0.0675198	-0.0873205
GO:0021602	cranial nerve morphogenesis	24	0.00774656	0.0293221	-0.146191	0.0570053
GO:0021604	cranial nerve structural organization	10	0.00253119	-0.00665098	-0.093292	0.0916735
GO:0021610	facial nerve morphogenesis	10	0.00789957	0.00693621	-0.079804	-0.0337548
GO:0021670	lateral ventricle development	12	0.0363187	0.00395545	-0.0612835	-0.126823
GO:0021675	nerve development	67	0.0272197	0.0220629	0.0219904	0.0500069
GO:0021680	cerebellar Purkinje cell layer development	22	0	0.00159616	-0.0301793	-0.0160988
GO:0021681	cerebellar granular layer development	12	0.0551232	0.00992074	0.0443624	-0.0358104
GO:0021692	cerebellar Purkinje cell layer morphogenesis	12	0.00515682	-0.000857581	-0.0104592	-0.0172057
GO:0021695	cerebellar cortex development	44	0.0406614	-0.000840581	0.0185063	-0.019966
GO:0021696	cerebellar cortex morphogenesis	28	0.0448133	-0.000857581	0.0185063	-0.0235131
GO:0021697	cerebellar cortex formation	20	0.0406614	0.007586	0.00691734	-0.0382505
GO:0021700	developmental maturation	230	0.0339859	0.0193844	0.0100505	0.0224113
GO:0021756	striatum development	19	0.0423464	0.00491504	0.0587266	-0.073992
GO:0021761	limbic system development	96	0.0361771	0.00648097	0.0473292	0.0317566
GO:0021762	substantia nigra development	39	0.0391956	0.02388	0.153605	0.0476046
GO:0021766	hippocampus development	73	0.0420781	0.00804691	0.0166113	0.0391215
GO:0021772	olfactory bulb development	26	0.0146752	-0.00302798	-0.0951068	0.0722615
GO:0021781	glial cell fate commitment	12	0.0131546	0.00562528	0.0541097	0.157499
GO:0021782	glial cell development	88	0.0629491	-0.00135626	0.0694262	0.0475041
GO:0021783	preganglionic parasympathetic fiber development	16	0.00980174	0.0169419	0.0171005	0.0916735
GO:0021794	thalamus development	13	0.0304498	0.0343599	0.00508784	0.113383
GO:0021795	cerebral cortex cell migration	39	0.0293731	0.0105403	-0.022393	-0.0364069
GO:0021799	cerebral cortex radially oriented cell migration	25	0.0355386	0.0263319	-0.022393	-0.117396
GO:0021801	cerebral cortex radial glia guided migration	18	0.0510714	0.0386478	-0.0462866	-0.102825
GO:0021819	layer formation in cerebral cortex	12	0.039989	0.0620141	-0.0462866	0.0313247
GO:0021846	cell proliferation in forebrain	23	-0.0114659	0.000283342	-0.0853012	-0.105576
GO:0021854	hypothalamus development	17	0.0210428	0.0354442	0.100307	0.0383782
GO:0021871	forebrain regionalization	20	-0.003827	-0.021109	-0.100714	-0.0229757
GO:0021872	forebrain generation of neurons	57	0.00804313	0.0201475	0.0258294	0.0612131
GO:0021877	forebrain neuron fate commitment	10	0.0585951	0.0376675	0.161615	0.101954
GO:0021879	forebrain neuron differentiation	46	0.0155158	0.0159465	0.0299447	0.0626084
GO:0021884	forebrain neuron development	26	0.0218985	0.00176994	-0.0680752	-0.017557
GO:0021885	forebrain cell migration	54	0.0317588	-0.00802235	-0.0365897	-0.0518915
GO:0021889	olfactory bulb interneuron differentiation	10	0.00773712	0.00231774	-0.0951068	0.143227
GO:0021892	cerebral cortex GABAergic interneuron differentiation	11	0.00707977	0.00491504	-0.0641818	0.0784711
GO:0021895	cerebral cortex neuron differentiation	23	0.041383	-0.00241785	-0.00141299	0.0148282
GO:0021903	rostrocaudal neural tube patterning	11	0.0300796	0.0753954	-0.025622	0.0779456
GO:0021904	dorsal/ventral neural tube patterning	23	0.0582588	0.00993207	-0.141744	0.0500069
GO:0021915	neural tube development	145	0.0200342	0.00340388	0.0244424	-0.0283124
GO:0021932	hindbrain radial glia guided cell migration	10	0.0340029	-0.000681909	0.077547	-0.0911795
GO:0021952	central nervous system projection neuron axonogenesis	25	0.0295016	0.0480397	0.0960215	0.025135
GO:0021953	central nervous system neuron differentiation	159	0.0295016	0.0175483	0.0229817	0.0181724
GO:0021954	central nervous system neuron development	68	0.0294373	0.0288329	0.00830688	-0.0323597
GO:0021955	central nervous system neuron axonogenesis	33	0.0293731	0.0323879	0.0960215	-0.0507487
GO:0021978	telencephalon regionalization	11	-0.0236874	-0.0305707	-0.118245	-0.0449187
GO:0021983	pituitary gland development	36	0.0114073	0.0316587	0.0601568	0.0252663
GO:0021984	adenohypophysis development	10	0.0114073	0.0287573	0.00270546	-0.0283726
GO:0021987	cerebral cortex development	99	0.0293731	0.00132982	-0.0420615	-0.0275198
GO:0021988	olfactory lobe development	27	0.0165774	-0.00241785	-0.0719686	0.0726547
GO:0022010	central nervous system myelination	16	0.0776187	0.0111183	0.0269301	0.000377168
GO:0022011	myelination in peripheral nervous system	21	0.0355386	-0.0124066	0.107856	0.0270946
GO:0022029	telencephalon cell migration	51	0.0327808	-0.00137515	-0.0311178	-0.0364069
GO:0022030	telencephalon glial cell migration	18	0.0510714	0.0386478	-0.0462866	-0.102825
GO:0022037	metencephalon development	97	0.033899	0.015478	0.00508784	-0.00575779
GO:0022038	corpus callosum development	16	0.0310807	0.0278393	0.0587646	-0.048501
GO:0022400	regulation of rhodopsin mediated signaling pathway	19	0.0112317	0.0434722	0.00749693	0.074982
GO:0022401	negative adaptation of signaling pathway	15	0.0481719	0.00187006	0.0451314	-0.073992
GO:0022404	molting cycle process	69	0.037352	0.0206197	0.0916235	0.0181724
GO:0022405	hair cycle process	69	0.037352	0.0206197	0.0916235	0.0181724
GO:0022406	membrane docking	156	0.0279073	0.0197451	0.0689223	0.0346639
GO:0022407	regulation of cell-cell adhesion	326	0.0197584	0.0233776	0.03894	-0.00622103
GO:0022408	negative regulation of cell-cell adhesion	145	0.0193428	0.0142804	0.0502912	-0.0293314
GO:0022409	positive regulation of cell-cell adhesion	208	0.0205309	0.0253742	0.0284892	0.0193446
GO:0022410	circadian sleep/wake cycle process	21	0.0210428	0.0246318	0.0565446	0.0480816
GO:0022411	cellular component disassembly	468	0.0344034	0.021109	0.0434233	0.00239056
GO:0022412	cellular process involved in reproduction in multicellular organism	262	0.0205517	0.0215491	0.00227508	0.0440875
GO:0022600	digestive system process	80	0.0306821	0.0206235	0.0987512	0.0303662
GO:0022602	ovulation cycle process	41	0.0185381	0.0168267	0.0733795	0.0453871
GO:0022604	regulation of cell morphogenesis	426	0.0413717	0.0186911	0.0215279	0.0174978
GO:0022612	gland morphogenesis	103	0.0304498	0.0228525	0.0258294	0.048772
GO:0022613	ribonucleoprotein complex biogenesis	409	0.0327656	0.011957	0.00976837	-0.00230754
GO:0022616	DNA strand elongation	24	-0.00470914	-0.00110126	-0.0617781	0.0689925
GO:0022617	extracellular matrix disassembly	67	0.0298378	0.0241445	0.0369075	0.0726065
GO:0022618	ribonucleoprotein complex assembly	222	0.0303402	0.00774656	0.0137835	0.000853588
GO:0022898	regulation of transmembrane transporter activity	220	0.0317891	0.0239235	0.0363075	0.0263052
GO:0022900	electron transport chain	150	0.0267286	0.0236213	0.0647795	-0.00387049
GO:0022904	respiratory electron transport chain	81	0.0211184	0.0144844	0.0314739	-0.00462721
GO:0023019	signal transduction involved in regulation of gene expression	18	0.0547926	0.0555917	0.0318235	0.12093
GO:0023058	adaptation of signaling pathway	16	0.0357747	-0.0109634	0.0347699	-0.0874395
GO:0023061	signal release	409	0.0400683	0.0260108	0.050426	0.00578439
GO:0030004	cellular monovalent inorganic cation homeostasis	79	0.0378167	0.0153798	0.1151	0.0227092
GO:0030007	cellular potassium ion homeostasis	11	0.0880173	0.0520518	0.044436	0.10992
GO:0030010	establishment of cell polarity	116	0.0258955	0.026602	0.0123179	0.0198769
GO:0030011	maintenance of cell polarity	13	0.0792752	0.0309334	0.3321	0.0527419
GO:0030031	cell projection assembly	499	0.0286024	0.0178316	0.0289594	0.0184487
GO:0030032	lamellipodium assembly	54	0.0684648	0.00941261	-0.0151028	-0.0105754
GO:0030033	microvillus assembly	16	0.012535	0.0210447	0.032143	0.00480579
GO:0030038	contractile actin filament bundle assembly	82	0.0375447	0.0266984	0.143079	0.047964
GO:0030041	actin filament polymerization	152	0.0360279	0.0140764	0.05407	-0.021002
GO:0030042	actin filament depolymerization	48	0.0222329	0.0247055	0.0193367	-0.0396651
GO:0030048	actin filament-based movement	117	0.0451949	-0.000200228	0.0403328	-0.0212649
GO:0030049	muscle filament sliding	29	0.0203062	-0.025293	0.0358871	-0.13273
GO:0030071	regulation of mitotic metaphase/anaphase transition	46	0.0458523	-0.00850781	-0.0726372	-0.120313
GO:0030072	peptide hormone secretion	221	0.0320478	0.0252061	0.0401735	-0.00989313
GO:0030073	insulin secretion	184	0.0317929	0.0253704	0.0389129	-0.00900678
GO:0030098	lymphocyte differentiation	285	0.0302156	0.0251985	0.0184995	0.048772
GO:0030099	myeloid cell differentiation	350	0.0311317	0.0267985	0.0265909	0.0325084
GO:0030100	regulation of endocytosis	228	0.0307841	0.0235136	0.0301101	0.0189348
GO:0030101	natural killer cell activation	60	0.0194278	0.0329526	0.0467403	0.0838352
GO:0030104	water homeostasis	55	0.00370989	0.0361053	0.00994522	0.0860057
GO:0030111	regulation of Wnt signaling pathway	271	0.0259239	0.0234418	0.0294937	0.0550432
GO:0030148	sphingolipid biosynthetic process	82	0.0474975	0.0358918	0.0828408	0.0250032
GO:0030149	sphingolipid catabolic process	21	0.0162638	0.0363055	-0.027994	0.0246248
GO:0030150	protein import into mitochondrial matrix	15	0.0278506	0.0356557	0.0411704	0.0761571
GO:0030157	pancreatic juice secretion	13	0.0660224	0.0338046	0.110179	0.0581097
GO:0030166	proteoglycan biosynthetic process	57	0.0351722	0.0094825	-0.00659385	-0.0445367
GO:0030168	platelet activation	133	0.036468	0.0228562	-0.031383	-0.012607
GO:0030177	positive regulation of Wnt signaling pathway	107	0.0320818	0.0178694	0.0564263	-0.00959887
GO:0030178	negative regulation of Wnt signaling pathway	143	0.0182057	0.030174	0.0118297	0.090658
GO:0030183	B cell differentiation	100	0.0293164	0.0144315	0.0245487	0.041027
GO:0030193	regulation of blood coagulation	59	0.0219155	0.0202079	0.0317689	-0.0461225
GO:0030194	positive regulation of blood coagulation	19	0.00182094	0.0109445	-0.0530887	-0.0535274
GO:0030195	negative regulation of blood coagulation	37	0.0458825	0.0337101	0.0750761	-0.0212174
GO:0030198	extracellular matrix organization	297	0.0295167	0.0204573	0.0307874	0.0191711
GO:0030199	collagen fibril organization	42	0.0529887	0.0304177	0.0310232	-0.0420545
GO:0030201	heparan sulfate proteoglycan metabolic process	27	0.0351722	0.0094825	0.0935965	0.0485922
GO:0030203	glycosaminoglycan metabolic process	136	0.0274369	0.0110126	0.0212735	-0.0570962
GO:0030204	chondroitin sulfate metabolic process	36	0.034358	0.0130526	-0.0292367	-0.0161826
GO:0030205	dermatan sulfate metabolic process	13	0.0682249	0.000188895	-0.0561234	-0.103092
GO:0030206	chondroitin sulfate biosynthetic process	25	0.0394185	0.000188895	-0.0561234	-0.093877
GO:0030207	chondroitin sulfate catabolic process	13	0.0682249	0.0556899	0.0512187	0.146846
GO:0030208	dermatan sulfate biosynthetic process	12	0.0701082	-0.00119759	-0.0595077	-0.109358
GO:0030212	hyaluronan metabolic process	32	0.0247301	0.0398567	0.115913	-0.0259927
GO:0030213	hyaluronan biosynthetic process	12	0.0429414	0.0636272	0.149022	0.139589
GO:0030214	hyaluronan catabolic process	15	0.00199473	-0.0117492	0.107748	-0.030768
GO:0030216	keratinocyte differentiation	195	0.0177939	0.0163205	0.0341601	0.0501287
GO:0030217	T cell differentiation	196	0.0292333	0.0267985	0.00157783	0.0350247
GO:0030218	erythrocyte differentiation	105	0.0144353	0.0175483	-0.014734	0.0219774
GO:0030219	megakaryocyte differentiation	80	0.0303138	0.0197338	-0.0048088	0.0318609
GO:0030220	platelet formation	18	0.0459429	0.0191161	0.0498045	0.192651
GO:0030224	monocyte differentiation	30	0.02235	0.0335514	0.000621546	0.0144465
GO:0030225	macrophage differentiation	35	0.0350853	0.0382511	0.128322	0.0507397
GO:0030238	male sex determination	12	0.0404102	0.00431246	0.060265	0.0468142
GO:0030239	myofibril assembly	55	0.0402761	0.00269364	0.0661712	-0.0933631
GO:0030252	growth hormone secretion	16	0.0488821	0.0264887	-0.117231	-0.0753509
GO:0030258	lipid modification	247	0.0388972	0.0225767	0.0357405	0.0535002
GO:0030260	entry into host cell	118	0.034868	0.0162487	0.0388368	0.00259168
GO:0030261	chromosome condensation	39	0.00223273	0.0101776	0.00161882	0.0626827
GO:0030262	apoptotic nuclear changes	29	0.000585573	0.0124293	0.00183806	0.0461011
GO:0030277	maintenance of gastrointestinal epithelium	15	0.03691	-0.0229771	0.173836	-0.104291
GO:0030278	regulation of ossification	158	0.0411242	0.0232548	0.0437666	0.00554148
GO:0030279	negative regulation of ossification	60	0.0363773	-0.00190217	-0.0174107	0.00587995
GO:0030282	bone mineralization	88	0.0584364	0.0194524	0.0480047	0.00279663
GO:0030299	intestinal cholesterol absorption	12	0.00257463	0.0360713	-0.029163	0.061768
GO:0030301	cholesterol transport	73	0.0180885	0.0232642	0.0218736	-0.0202607
GO:0030307	positive regulation of cell growth	141	0.0381038	0.0280546	0.0373495	0.0188101
GO:0030308	negative regulation of cell growth	165	0.0314018	0.0130791	0.00742722	0.0132524
GO:0030316	osteoclast differentiation	75	0.0489086	0.0337592	0.0409773	-0.0161665
GO:0030317	flagellated sperm motility	73	0.0235703	0.0174576	-0.000374037	0.0129609
GO:0030318	melanocyte differentiation	22	0.0539332	0.0606616	0.0811899	0.232086
GO:0030323	respiratory tube development	151	0.0350135	0.0133435	0.0308397	-0.00911888
GO:0030324	lung development	148	0.034732	0.0148282	0.0333414	-0.00796031
GO:0030325	adrenal gland development	22	0.0706031	0.0554613	0.124001	0.0373422
GO:0030326	embryonic limb morphogenesis	111	0.0356142	0.00985652	0.103019	0.00463392
GO:0030330	DNA damage response, signal transduction by p53 class mediator	96	0.0237006	0.0136514	-0.0440448	0.0161417
GO:0030335	positive regulation of cell migration	417	0.0239896	0.0235363	0.0215445	0.0191711
GO:0030336	negative regulation of cell migration	238	0.0287649	0.00486026	0.0354198	-0.011135
GO:0030397	membrane disassembly	16	0.04766	-0.0189782	0.174465	-0.0772693
GO:0030431	sleep	28	0.0440502	0.0242522	0.034159	-0.00721559
GO:0030433	ubiquitin-dependent ERAD pathway	61	-0.00890449	0.000706465	-0.123151	-0.056169
GO:0030449	regulation of complement activation	32	0.0487178	0.0179242	0.0845987	0.00426618
GO:0030488	tRNA methylation	35	-0.00558373	0.00772956	-0.00463179	-0.0519046
GO:0030490	maturation of SSU-rRNA	41	0.0360033	0.00351344	-0.0823139	0.000576194
GO:0030497	fatty acid elongation	11	0.0510884	0.0470725	0.256234	0.0428119
GO:0030500	regulation of bone mineralization	57	0.0508353	0.0245714	0.0456208	0.0647843
GO:0030501	positive regulation of bone mineralization	28	0.0721218	0.0443978	0.174574	0.0641047
GO:0030502	negative regulation of bone mineralization	15	0.0462263	0.041961	0.0456208	0.114054
GO:0030509	BMP signaling pathway	118	0.035924	0.00345299	0.0382808	0.0382224
GO:0030510	regulation of BMP signaling pathway	71	0.0448171	0.00958451	0.0463758	-0.0165381
GO:0030511	positive regulation of transforming growth factor beta receptor signaling pathway	28	0.0269647	-0.015682	0.00932711	-0.0385231
GO:0030512	negative regulation of transforming growth factor beta receptor signaling pathway	66	0.0483003	0.00858714	0.0896901	-0.00240166
GO:0030513	positive regulation of BMP signaling pathway	26	0.0475013	0.042624	0.097729	0.042293
GO:0030514	negative regulation of BMP signaling pathway	40	0.0486422	-0.0109181	0.0209779	-0.0335038
GO:0030516	regulation of axon extension	87	0.0182812	0.01626	0.0140987	0.0303898
GO:0030517	negative regulation of axon extension	39	0.0136571	0.011821	0.00159959	0.0357369
GO:0030518	intracellular steroid hormone receptor signaling pathway	130	0.018948	0.0324294	-0.017702	0.0608861
GO:0030520	intracellular estrogen receptor signaling pathway	50	0.0256708	0.0299832	-0.01275	0.0815078
GO:0030521	androgen receptor signaling pathway	67	0.0233851	0.035686	-0.0373282	0.0389382
GO:0030522	intracellular receptor signaling pathway	256	0.0234135	0.0242616	0.00278152	0.0212179
GO:0030534	adult behavior	120	0.0421915	0.00935595	0.0474492	-0.0376436
GO:0030539	male genitalia development	16	0.0284135	0.0275654	0.0879394	0.025532
GO:0030540	female genitalia development	16	-0.0136004	-0.0166643	0.102793	-0.018843
GO:0030574	collagen catabolic process	34	-0.000814135	0.0185608	-0.0143112	0.0725672
GO:0030575	nuclear body organization	10	0.0725922	0.0764154	-0.109631	0.0255794
GO:0030593	neutrophil chemotaxis	70	0.00262563	0.019203	-0.0662956	-0.0422943
GO:0030595	leukocyte chemotaxis	163	0.0274161	0.0213149	-0.0154593	0.0119297
GO:0030641	regulation of cellular pH	64	0.0294827	0.00403101	0.124171	0.0192616
GO:0030705	cytoskeleton-dependent intracellular transport	155	0.0444204	0.0263319	0.0455483	0.0288147
GO:0030728	ovulation	18	0.00492826	0.0137912	0.00581129	-0.0480812
GO:0030730	sequestering of triglyceride	11	0.0195128	0.0124293	0.0635319	0.00829921
GO:0030808	regulation of nucleotide biosynthetic process	62	0.0351892	0.0306557	0.0533438	0.0358652
GO:0030809	negative regulation of nucleotide biosynthetic process	16	0.012705	0.0442731	0.0135188	0.0863128
GO:0030810	positive regulation of nucleotide biosynthetic process	32	0.0357974	0.0297414	0.0533438	0.0194369
GO:0030811	regulation of nucleotide catabolic process	37	0.0420366	0.0457351	0.0523714	0.0606658
GO:0030812	negative regulation of nucleotide catabolic process	12	0.012705	0.0582551	-0.0305887	0.114002
GO:0030813	positive regulation of nucleotide catabolic process	17	0.0685574	0.0457351	0.119087	0.0353638
GO:0030832	regulation of actin filament length	151	0.0359277	0.01626	0.0437636	-0.0129694
GO:0030833	regulation of actin filament polymerization	133	0.0359277	0.0158596	0.0532349	-0.0160898
GO:0030834	regulation of actin filament depolymerization	45	0.0219155	0.0202835	0.014031	-0.0510028
GO:0030835	negative regulation of actin filament depolymerization	36	0.0218872	0.0176767	0.0140648	-0.0548587
GO:0030836	positive regulation of actin filament depolymerization	11	0.0225011	0.0309334	-0.0216657	0.0527419
GO:0030837	negative regulation of actin filament polymerization	51	0.0219647	0.0183983	0.0616925	-0.0510028
GO:0030838	positive regulation of actin filament polymerization	83	0.0371102	0.00243296	0.0532349	-0.02006
GO:0030850	prostate gland development	39	0.0293731	0.0228525	-0.0286343	0.0391166
GO:0030851	granulocyte differentiation	30	0.0359938	0.0535421	-0.010106	0.0361427
GO:0030852	regulation of granulocyte differentiation	14	0.0383097	0.029477	-0.0210639	-0.0367515
GO:0030856	regulation of epithelial cell differentiation	124	0.0204327	0.0162544	0.00183743	-0.014351
GO:0030857	negative regulation of epithelial cell differentiation	35	0.00804313	0.00759734	0.00508784	-0.0153634
GO:0030858	positive regulation of epithelial cell differentiation	54	0.0233493	0.0185438	0.0212771	-0.0145704
GO:0030859	polarized epithelial cell differentiation	16	0.0209068	-0.0154421	0.0189608	0.0007296
GO:0030865	cortical cytoskeleton organization	41	0.0342692	-0.00450325	0.072362	-0.0158411
GO:0030866	cortical actin cytoskeleton organization	36	0.0283965	-0.0048527	0.0580628	0.000931271
GO:0030878	thyroid gland development	23	0.00981118	0.0030072	-0.0407297	-0.0259533
GO:0030879	mammary gland development	118	0.0202665	0.0227731	-0.00462583	-0.00445143
GO:0030888	regulation of B cell proliferation	52	0.0171667	0.0273916	-0.106733	0.0486854
GO:0030889	negative regulation of B cell proliferation	15	-0.0125917	0.0224331	-0.0943455	-0.0224534
GO:0030890	positive regulation of B cell proliferation	34	0.0260599	0.0293731	-0.132975	0.025097
GO:0030900	forebrain development	337	0.0300796	0.0133435	0.0180268	0.0187549
GO:0030901	midbrain development	83	0.0232454	0.02388	0.144183	0.055915
GO:0030902	hindbrain development	133	0.027299	0.0144844	0.0109216	0.0181724
GO:0030903	notochord development	16	0.0681078	0.066421	0.148822	0.364449
GO:0030947	regulation of vascular endothelial growth factor receptor signaling pathway	29	0.0365058	0.0375522	0.10741	-0.00575779
GO:0030948	negative regulation of vascular endothelial growth factor receptor signaling pathway	10	0.0507616	0.0489633	-0.00062908	-0.000401075
GO:0030949	positive regulation of vascular endothelial growth factor receptor signaling pathway	15	0.024749	0.0512962	0.192881	0.178913
GO:0030950	establishment or maintenance of actin cytoskeleton polarity	10	0.00178694	-0.000173783	0.148608	-0.048183
GO:0030952	establishment or maintenance of cytoskeleton polarity	14	0.0145657	0.00239707	0.148608	-0.048183
GO:0030968	endoplasmic reticulum unfolded protein response	107	0.0295091	0.0160825	-0.0594753	0.0271943
GO:0030970	retrograde protein transport, ER to cytosol	26	-0.0272291	0.022724	-0.105004	-0.0489251
GO:0031000	response to caffeine	16	-0.00188139	-0.032743	0.0288592	-0.147386
GO:0031016	pancreas development	69	0.00921427	0.0230716	0.0816423	0.0383115
GO:0031018	endocrine pancreas development	40	0.00566872	0.00573106	0.11116	0.0248437
GO:0031023	microtubule organizing center organization	115	0.0208615	0.0149113	-0.0305867	0.0277282
GO:0031032	actomyosin structure organization	161	0.0402761	0.0201475	0.122055	0.0143463
GO:0031047	gene silencing by RNA	161	0.0100945	0.0229205	0.00291304	0.0391562
GO:0031050	dsRNA processing	45	0.0177448	0.0290369	0.0107012	0.0876831
GO:0031054	pre-miRNA processing	12	0.0247206	0.0164603	-0.043656	0.0809887
GO:0031055	chromatin remodeling at centromere	38	0.00421801	0.0453932	-0.00657316	0.0211264
GO:0031056	regulation of histone modification	130	0.0336931	0.0143428	0.01561	0.0331934
GO:0031057	negative regulation of histone modification	38	0.0312696	0.00146582	-0.00792792	0.0659776
GO:0031058	positive regulation of histone modification	82	0.0370554	0.0144448	-0.0361803	0.0296764
[truncated: 3,920 more rows]
